# Supplementary material for: cis-Enals in N-heterocyclic carbene-catalyzed reactions: distinct stereoselectivity and reactivity
Source: Royal Society of Chemistry journal article supplement (doi:10.1039/c3sc50666e), 2013-01-01
Supplement: c3sc50666e.pdf [file c3sc50666e.pdf]

## Supplementary Information

### ***Cis*-Enals in *N*-Heterocyclic Carbene-Catalyzed Reactions: Distinct Stereo-Selectivity and Reactivity**

Xingkuan Chen,<sup>†</sup> Xinqiang Fang,<sup>†</sup> and Yonggui Robin Chi\*

*Division of Chemistry & Biological Chemistry, School of Physical & Mathematical Sciences, Nanyang Technological University, Singapore 637371, Singapore*

[robinchi@ntu.edu.sg](mailto:robinchi@ntu.edu.sg)

### **Table of Contents**

|     |                                                                                                                                                                                  |    |
|-----|----------------------------------------------------------------------------------------------------------------------------------------------------------------------------------|----|
| I   | General information<br>Summary of the reaction condition optimizations                                                                                                           | 1  |
| II  | General procedure for the catalytic synthesis of products <b>3</b><br>Synthetic transformations of <b>3a</b><br>Stereochemistry determination by X-ray crystallographic analysis | 5  |
| III | Characterizations of products                                                                                                                                                    | 9  |
| IV  | <sup>1</sup> H, <sup>13</sup> C NMR and HPLC spectra                                                                                                                             | 17 |

#### **I. General information:**

Commercially available materials purchased from Alfa Aesar or Sigma-Aldrich were used as received, except aldehydes that were purified *via* distillation or column chromatography prior to use. Proton nuclear magnetic resonance (<sup>1</sup>H NMR) spectra were recorded on a Bruker (400 MHz) spectrometer. Chemical shifts were recorded in parts per million (ppm,  $\delta$ ) relative to tetramethylsilane ( $\delta$  0.00) or chloroform ( $\delta$  = 7.26, singlet). <sup>1</sup>H NMR splitting patterns are designated as singlet (s), doublet (d), triplet (t), quartet (q), dd (doublet of doublets), m (multiplets), and etc. All first-order splitting patterns were assigned on the basis of the appearance of the multiplet. Splitting patterns that could not be easily interpreted are designated as multiplet (m) or broad (br). Carbon nuclear magnetic resonance (<sup>13</sup>C NMR) spectra were recorded on a Bruker (400 MHz) (100 MHz) spectrometer. High resolution mass spectral analysis (HRMS) was performed on Finnigan MAT 95 XP mass spectrometer (Thermo Electron Corporation). The determination of *ee* was performed *via* chiral HPLC analysis using Shimadzu LC-20AD HPLC workstation. X-ray crystallography analysis was performed on Bruker X8 APEX X-ray diffractionmeter. Optical rotations were measured using a 0.5 mL cell with a 10 mm path length on a Jasco P-1030 polarimeter and are reported as follows:  $[\alpha]_D^{25}$  (*c* in g per 100 mL solvent). Analytical thin-layer chromatography (TLC) was carried out on Merck 60 F254 pre-coated silica gel plate (0.2 mm thickness). Visualization was performed using a UV lamp.

## Summary of the reaction condition optimization:

**Table S1.** Study on the suppression of *cis*-to-*trans* enal isomerizations.

To a 10 mL Schlenk tube was added *cis*-enal **1a** (0.1 mmol) and THF (1 mL). Catalytic amount (30 mol%) of base or acid–base salt or/and NHC catalyst **A** were added to the reaction mixture under N<sub>2</sub> atmosphere and allowed to stir at rt for 3 h. The ratios of *trans*- to *cis*-enals were measured by <sup>1</sup>H NMR analysis of the crude reaction mixture.

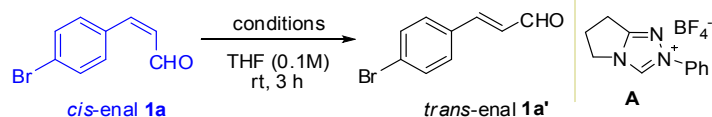

| Entry | Conditions                        | <b>1a/1a'</b> <sup>a</sup> |
|-------|-----------------------------------|----------------------------|
| 1     | DBU (30 mol%)                     | 100:0                      |
| 2     | DBU•HCl (30 mol%)                 | 12:88                      |
| 3     | DBU•HBF <sub>4</sub> (30 mol%)    | 77:23                      |
| 4     | DBU (30 mol%), HOAc (30 mol%)     | 24:76                      |
| 5     | <b>A</b> (20 mol%), DBU (30 mol%) | 79:21                      |

<sup>a</sup> Determined by <sup>1</sup>H NMR analysis of unpurified reaction mixtures. DBU=1,8-Diazabicycloundec-7-ene.

**Table S2.** Screening of catalysts and additives (selected examples).<sup>[a]</sup>

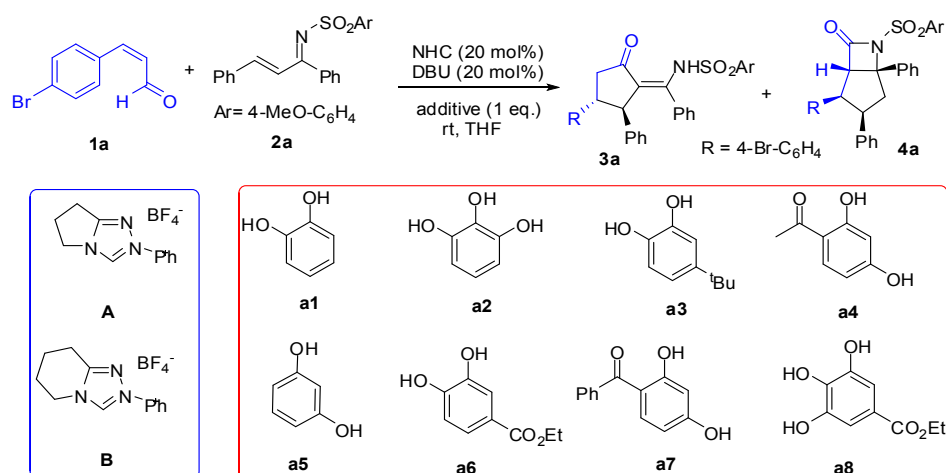

| Entry | Catalyst | Additive  | Conversion [%] <sup>[b]</sup> | <b>3a:4a</b> <sup>[b]</sup> |
|-------|----------|-----------|-------------------------------|-----------------------------|
| 1     | <b>A</b> | -         | 74                            | 41:59                       |
| 2     | <b>A</b> | <b>a1</b> | 43                            | 80:20                       |
| 3     | <b>B</b> | <b>a1</b> | <10%                          | -                           |
| 4     | <b>A</b> | <b>a2</b> | >95                           | <b>94:6</b>                 |
| 5     | <b>A</b> | <b>a3</b> | 48                            | 79:21                       |
| 6     | <b>A</b> | <b>a4</b> | 89                            | 81:19                       |
| 7     | <b>A</b> | <b>a5</b> | 92                            | 89:11                       |
| 8     | <b>A</b> | <b>a6</b> | 61                            | 80:20                       |
| 9     | <b>A</b> | <b>a7</b> | 86                            | 76:24                       |
| 10    | <b>A</b> | <b>a8</b> | 54                            | 95:5                        |

[a] Reaction condition: **1a** (0.20 mmol), **2a** (0.10 mmol), catalyst (0.02 mmol), DBU (0.02 mmol), additive (0.1 mmol), THF (1 mL) 12h. [b] Determined by <sup>1</sup>H NMR analysis of unpurified reaction mixtures.

**Table S3.** Screening of bases and solvents.<sup>[a]</sup>

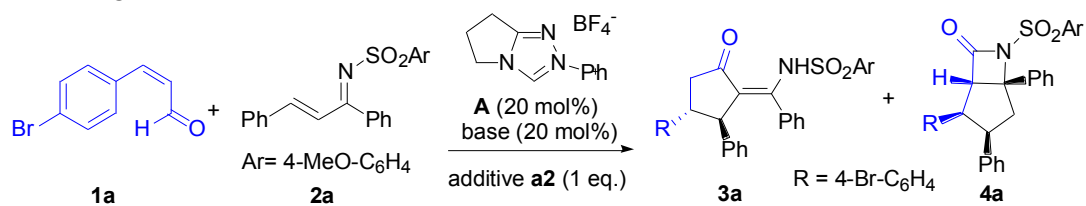

| Entry | Base                           | Solvent                         | Conversion [%] <sup>[b]</sup> | <b>3a:4a</b> <sup>[b]</sup> |
|-------|--------------------------------|---------------------------------|-------------------------------|-----------------------------|
| 1     | <sup>t</sup> BuOK              | THF                             | 70                            | 94:6                        |
| 2     | KHMDS                          | THF                             | 92                            | 94:6                        |
| 3     | KOAc                           | THF                             | 90                            | 95:5                        |
| 4     | K <sub>3</sub> PO <sub>4</sub> | THF                             | 81                            | 95:5                        |
| 5     | DIEA                           | THF                             | 38                            | 99:1                        |
| 6     | DBU                            | CH <sub>2</sub> Cl <sub>2</sub> | 17                            | -                           |
| 7     | DBU                            | EtOAc                           | 33                            | -                           |
| 8     | DBU                            | toluene                         | < 5                           | -                           |

[a] Reaction condition: **1a** (0.20 mmol), **2a** (0.10 mmol), catalyst **A** (0.02 mmol), base (0.02 mmol), additive **a2** (0.10 mmol), solvent (1 mL), 12 h. [b] Determined *via* <sup>1</sup>H NMR analysis of unpurified reaction mixtures.

## II. General procedure for the catalytic reaction of *cis*-enal **1** with $\alpha,\beta$ -unsaturated imine **2**.

To a 10 mL oven-dried Schlenk tube equipped with a stir bar, was successively added *cis*-enal **1** (0.3 mmol),  $\alpha,\beta$ -unsaturated imine **2** (0.1 mmol), triazolium salt **D** (7.2 mg, 0.02 mmol) and pyrogallol **F** (12.6 mg, 0.1 mmol). The tube was closed with a septum, evacuated and refilled with nitrogen. To this mixture was added freshly distilled anhydrous THF (0.5 mL) followed by an injection of DIEA (7.0  $\mu$ L, 0.04 mmol). The reaction mixture was stirred at rt for 24 h. After complete consumption of **2**, as indicated by TLC and crude  $^1\text{H}$  NMR analysis, the solvent was removed under reduced pressure. The resulting crude residue was purified by column chromatography on silica gel with hexane/EtOAc (5:1) as eluent to afford the desired product **3**.

### Synthetic transformations of **3a**.

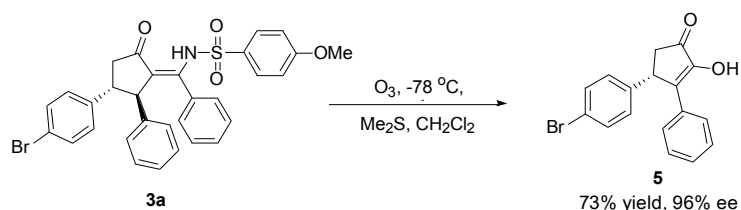

A solution of **3a** (58.7 mg, 0.1 mmol) in anhydrous  $\text{CH}_2\text{Cl}_2$  (5 mL) in a 10 mL Schlenk tube was cooled to  $-78^\circ\text{C}$ . The reaction mixture was slowly bubbled with ozone at the same temperature until it turned to light blue color, followed by nitrogen bubbling for 10 min to remove the dissolved ozone. Dimethyl sulfide (2 mL) was added to the reaction mixture and stirred further for 12 h, simultaneously allowing it to warm up to rt. The resulting mixture was concentrated under reduced pressure, and the residue was purified by column chromatography on silica gel with hexane/EtOAc (5:1) as eluent to afford cyclopentene derivative **5** as a white solid (24 mg, 73% yield).

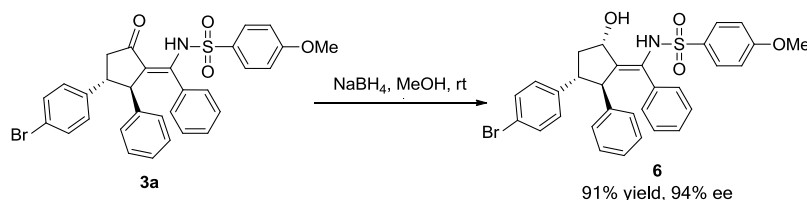

To a solution of **3a** (58.7 mg, 0.1 mmol) in MeOH (2 mL) was added  $\text{NaBH}_4$  (7.6 mg, 0.2 mmol) at  $0^\circ\text{C}$  and the mixture was stirred at rt for 2 h. The reaction mixture was quenched with water (0.5 mL) at rt and extracted with EtOAc and the combined organics were dried over anhydrous  $\text{Na}_2\text{SO}_4$ . Solvent was concentrated under reduced pressure and the residue was purified by column chromatography on silica gel with hexane/EtOAc (3:1) as eluent to afford the product **6** as a colorless oil (53 mg, 91% yield).

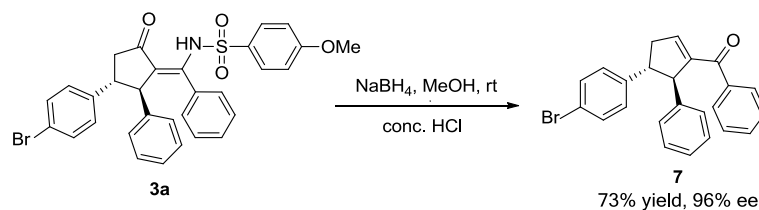

To a solution of **3a** (58.7 mg, 0.1 mmol) in MeOH (2 mL) was added  $\text{NaBH}_4$  (7.6 mg, 0.2 mmol) at  $0^\circ\text{C}$  and the mixture was stirred at rt for 3 h. The reaction mixture was acidified with concentrated hydrochloric acid (0.5 mL) at rt and stirred at the same temperature for 5 h. After completion of the reaction, the reaction

mixture was neutralized with aqueous NaHCO<sub>3</sub> solution, extracted with EtOAc and the combined organics were dried over anhydrous Na<sub>2</sub>SO<sub>4</sub>. Solvent was concentrated under reduced pressure and the residue was purified by column chromatography on silica gel with hexane/EtOAc (15:1) as eluent to afford the product **7** as a yellow oil (35 mg, 87% yield).

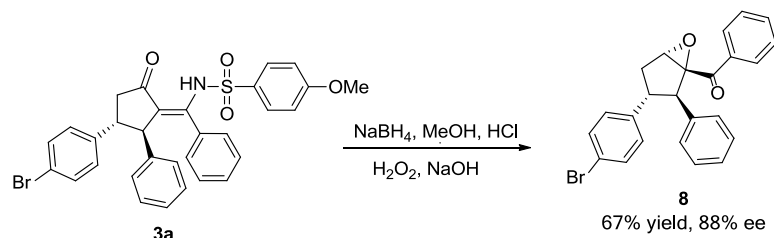

To a solution of **3a** (58.7 mg, 0.1 mmol) in MeOH (2 mL) was added NaBH<sub>4</sub> (7.6 mg, 0.2 mmol) at 0 °C and the mixture was stirred at rt for 2 h. The reaction mixture was acidified with concentrated hydrochloric acid (0.3 mL) at rt and stirred at the same temperature for 5 h. After completion of the reaction, the reaction mixture pH was adjusted to 7 with 6N NaOH solution, and then charged with 30% H<sub>2</sub>O<sub>2</sub> (1.8 mL, 0.3 mmol) at 0 °C followed by the solution of 6N NaOH (0.08 mL, 0.48 mmol). The mixture was stirred at room temperature for 4h. The reaction mixture was extracted with EtOAc and the combined organics were dried over anhydrous Na<sub>2</sub>SO<sub>4</sub>. Solvent was concentrated under reduced pressure and the residue was purified by column chromatography on silica gel with hexane/EtOAc (10:1) as eluent to afford the product **8** as a colorless wax (26 mg, 67% yield).

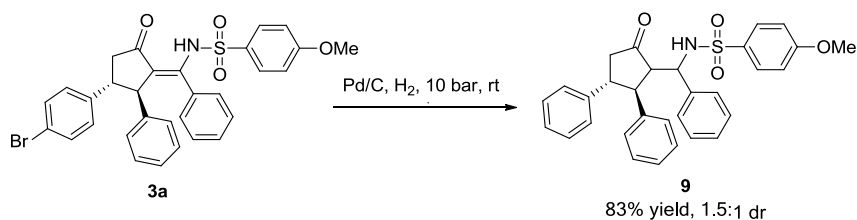

To a solution of **3a** (58.7 mg, 0.1 mmol) in MeOH (2 mL) was added Pd/C (10%, 21.2 mg, 0.02 mmol) at rt. The reaction mixture was stirred under 10 bar of hydrogen at room temperature for 12h. The reaction mixture was diluted with ethyl acetate, and passed through a short silica pad. Solvent was concentrated under reduced pressure and the residue was purified by column chromatography on silica gel with hexane/EtOAc (5:1) as eluent to afford the product **9** as a colorless oil (41 mg, 83% yield, 1.5:1 dr, 93% ee major, 92% ee minor).

### Stereochemistry determination by X-ray crystallographic analysis and 2D NOE analysis.

Absolute configuration of all the products were assigned based on the crystal X-ray structure of **3g**. The crystal (colorless flaky crystal) was obtained by vaporization of a acetone/methanol (1:2) solution of compound **3g**. The CCDC 884437 contains the supplementary crystallographic data. New chiral center for transformation products **6** and **8** were confirmed by 2D NOE analysis.

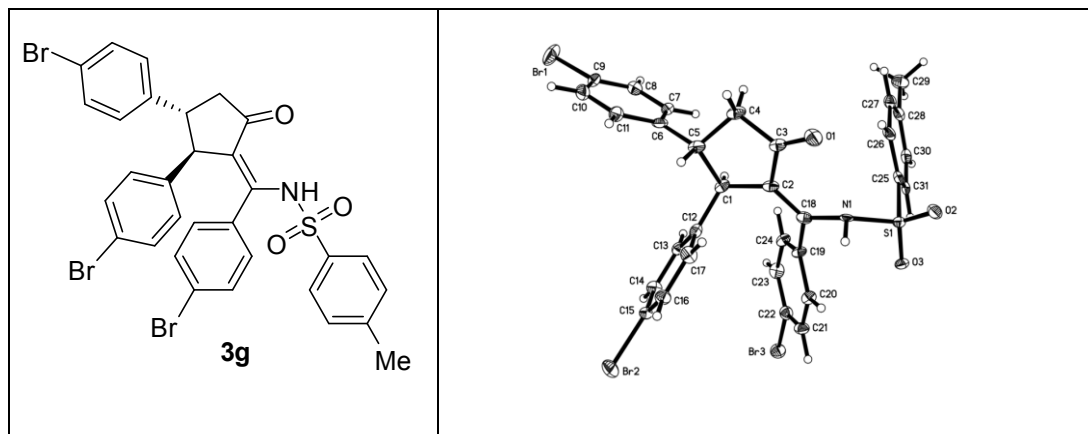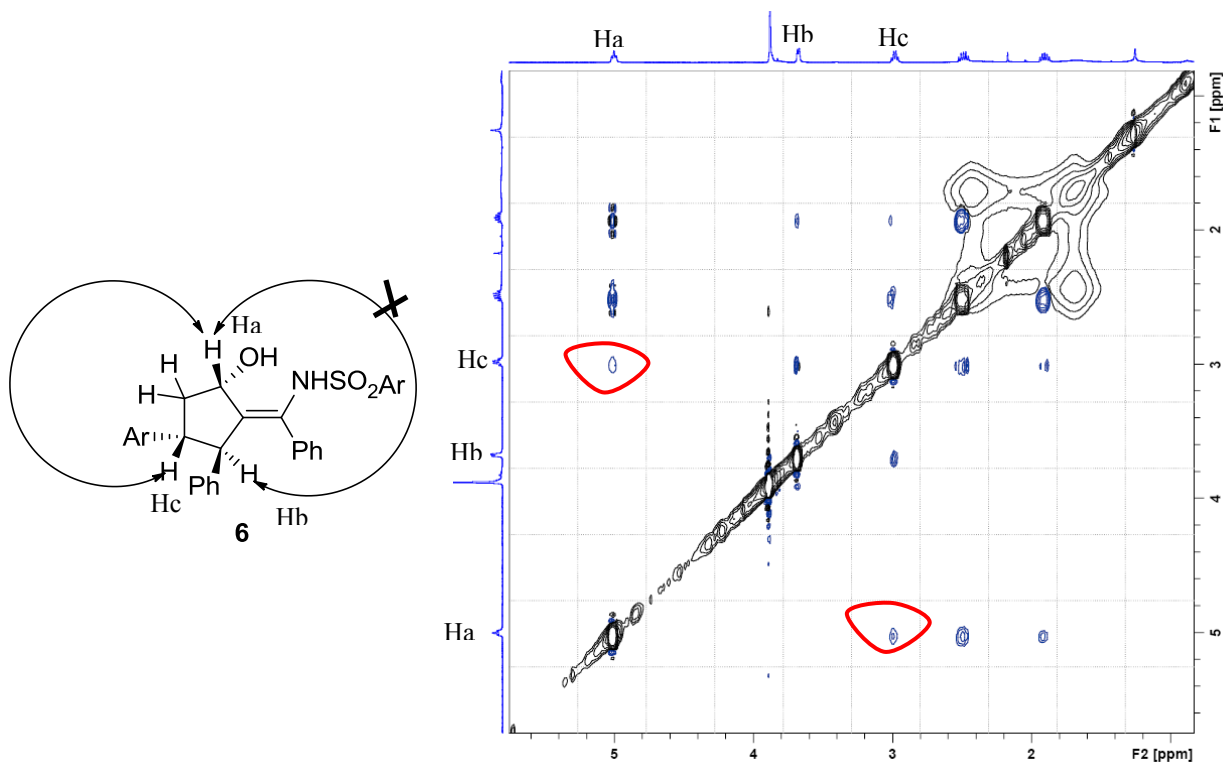

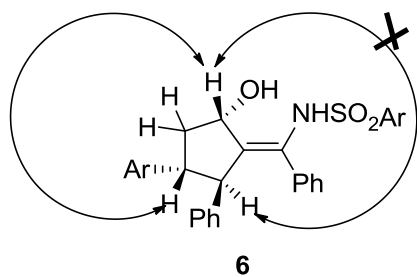

6

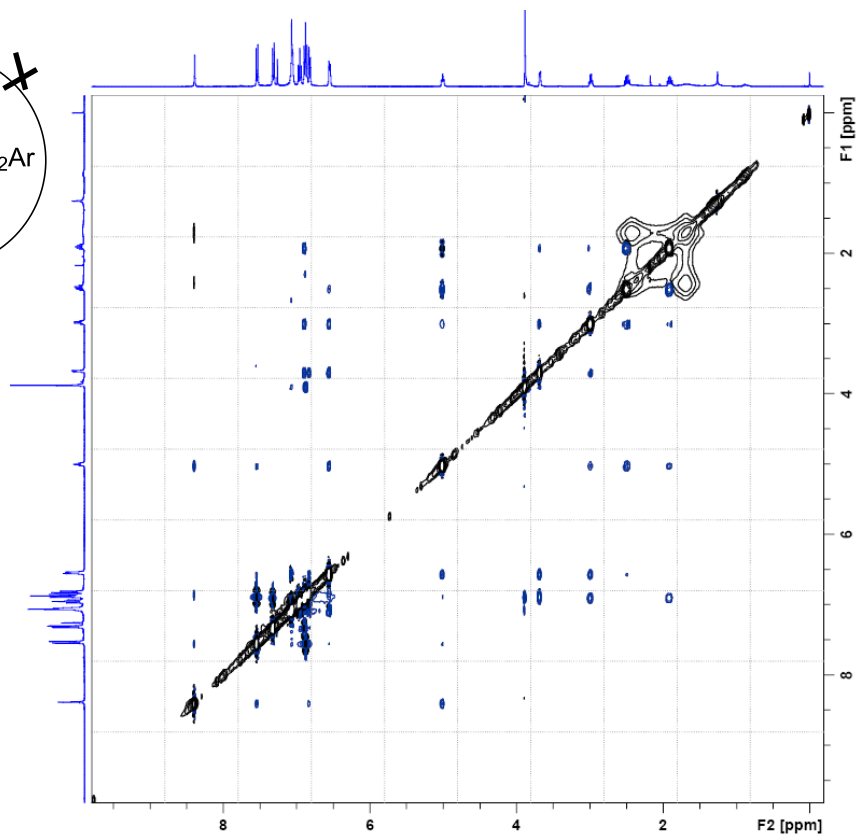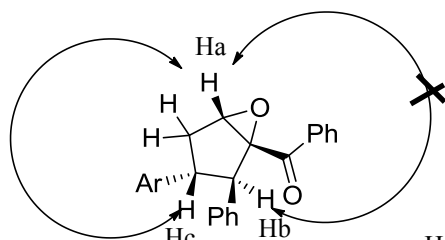

8

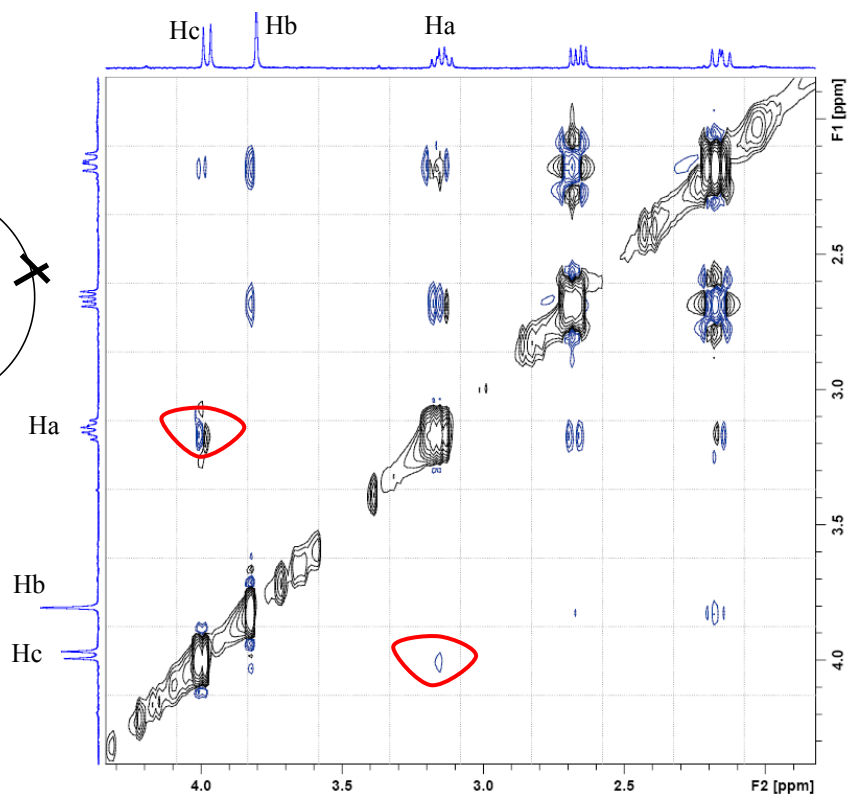



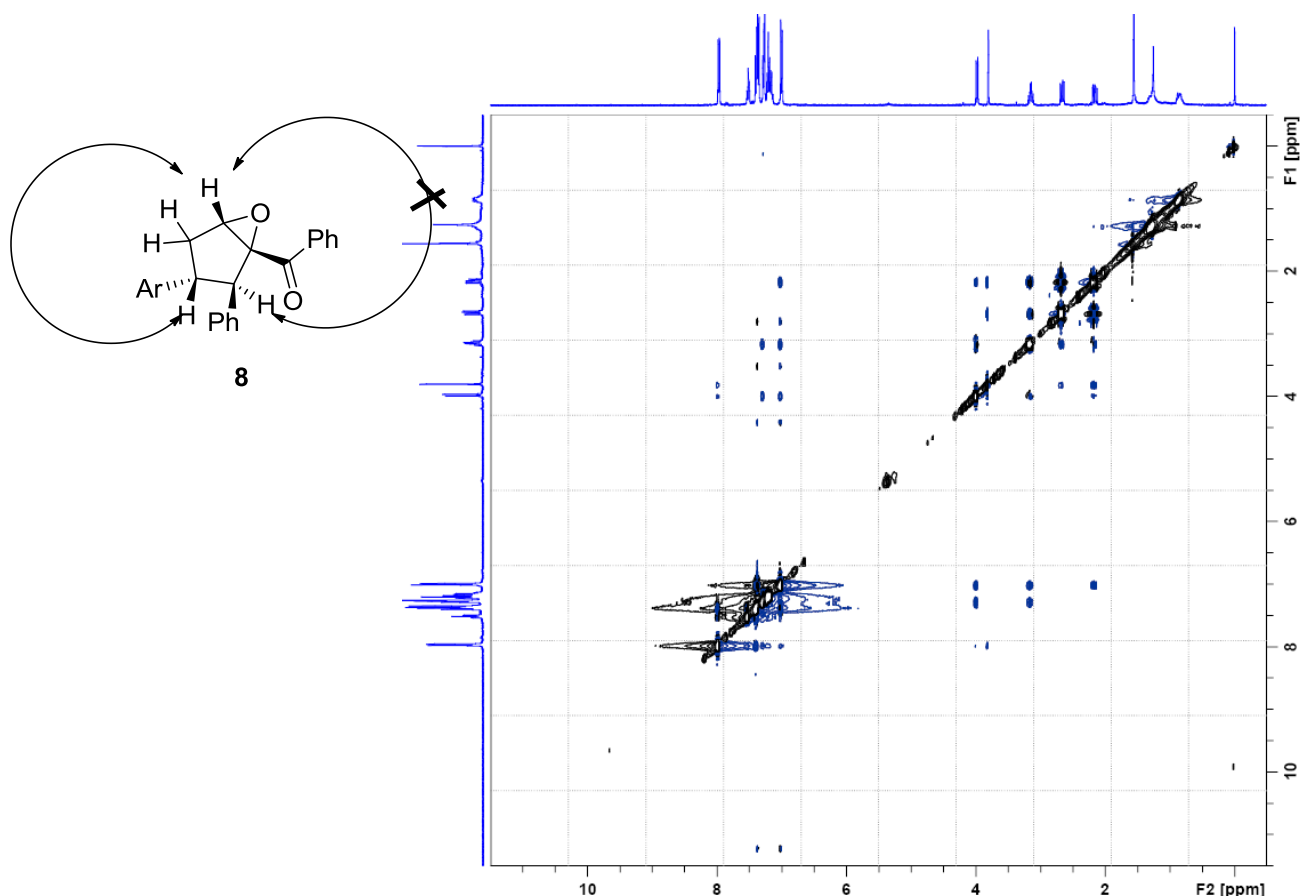

### III. Characterization of Products.

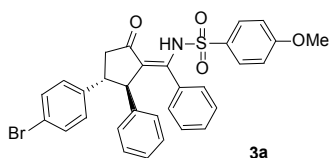

***N*-((*Z*)-((2*R*,3*R*)-3-(4-Bromophenyl)-5-oxo-2-phenylcyclopentylidene)(phenyl)methyl)-4-methoxybenzenesulfonamide (3a):** Yellowish thick oil, 44 mg, 75% yield,  $^1\text{H}$  NMR (400 MHz,  $\text{CDCl}_3$ )  $\delta$  2.61-2.67 (dd,  $J = 6.0, 6.4$  Hz, 1H), 2.94-3.01 (dd,  $J = 8.4, 8.4$  Hz, 1H), 3.23 (m, 1H), 3.71 (d,  $J = 4.8$  Hz, 1H), 3.85 (s, 3H), 6.60-6.66 (m, 4H), 6.79-6.89 (m, 4H), 6.94-7.02 (m, 5H), 7.11-7.14 (m, 1H), 7.33-7.36 (m, 4H), 12.05 (s, 1H);  $^{13}\text{C}$  NMR (100 MHz,  $\text{CDCl}_3$ )  $\delta$  44.9, 48.8, 54.5, 55.7, 113.9, 118.5, 120.6, 126.3, 127.1, 127.4, 128.3, 128.4, 129.0, 129.5, 129.9, 131.0, 131.5, 131.8, 142.6, 143.7, 150.8, 163.3, 207.2; HRMS (ESI,  $m/z$ ): calcd. for  $\text{C}_{31}\text{H}_{26}\text{BrNO}_4\text{S}(\text{M}+\text{H})^+$ : 588.0844, found: 588.0844;  $[\alpha]_{\text{D}}^{20}$ : -108.0 ( $c$  4.3,  $\text{CHCl}_3$ ); HPLC analysis: 92% ee (Chiralcel OD-H, 10:90  $^i\text{PrOH}$ /Hexane, 0.70 mL/min),  $R_t$  (minor) = 39.2 min,  $R_t$  (major) = 45.7 min.

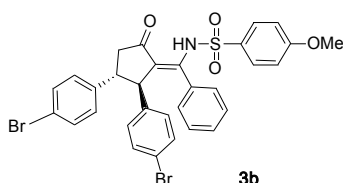

***N*-((*Z*)-((2*R*,3*R*)-2,3-Bis(4-bromophenyl)-5-oxocyclopentylidene)(phenyl)methyl)-4-methoxybenzenesulfonamide (3b):** Yellowish thick oil, 46.5 mg, 70% yield,  $^1\text{H}$  NMR (400 MHz,  $\text{CDCl}_3$ )  $\delta$  2.65-2.71 (dd,  $J =$

6.0, 7.6 Hz, 1H), 2.90-2.97 (dd,  $J = 8.4, 8.4$  Hz, 1H), 3.16 (q,  $J = 8.0$  Hz, 1H), 3.68 (d,  $J = 5.6$  Hz, 1H), 3.85 (s, 3H), 6.46 (d,  $J = 8.4$  Hz, 2H), 6.62 (d,  $J = 7.2$  Hz, 2H), 6.79-6.85 (dd,  $J = 5.2, 8.4$  Hz, 4H), 6.97 (t,  $J = 7.6$  Hz, 2H), 7.08-7.16 (m, 3H), 7.30-7.34 (t,  $J = 8.8$  Hz, 4H), 12.09 (s, 1H);  $^{13}\text{C}$  NMR (100 MHz,  $\text{CDCl}_3$ )  $\delta$  44.9, 48.9, 54.2, 55.7, 114.0, 117.9, 120.0, 120.8, 127.5, 128.5, 128.9(0), 128.9(5), 129.6, 129.9, 130.8, 131.3, 131.5, 131.8, 141.7, 142.5, 151.2, 163.3, 206.4; HRMS (ESI,  $m/z$ ): calcd. for  $\text{C}_{31}\text{H}_{25}\text{Br}_2\text{NO}_4\text{S}(\text{M}+\text{H})^+$ : 665.9949, found: 665.9951;  $[\alpha]_{\text{D}}^{20}$ : -87.2 ( $c$  2.1,  $\text{CHCl}_3$ ); HPLC analysis: 95% ee (Chiralcel OD-H, 10:90  $^i\text{PrOH}$ /Hexane, 0.75 mL/min),  $R_t$  (minor) = 39.7 min,  $R_t$  (major) = 68.9 min.

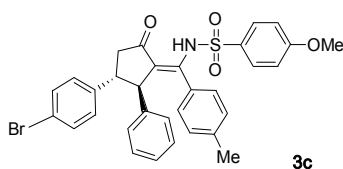

***N*-((*Z*)-((2*R*,3*R*)-3-(4-Bromophenyl)-5-oxo-2-phenylcyclopentylidene)(*p*-tolyl)methyl)-4-methoxybenzenesulfonamide (3c):** Yellowish thick oil, 39 mg, 65% yield,  $^1\text{H}$  NMR (400 MHz,  $\text{CDCl}_3$ )  $\delta$  2.21 (s, 3H), 2.55-2.61 (dd,  $J = 5.2, 5.6$  Hz, 1H), 2.91-2.98 (dd,  $J = 8.4, 8.4$  Hz, 1H), 3.20-3.25 (m, 1H), 3.74 (d,  $J = 4.0$  Hz, 1H), 3.87 (s, 3H), 6.58 (d,  $J = 7.6$  Hz, 2H), 6.63-6.65 (m, 2H), 6.78-6.85 (m, 6H), 7.03-7.04 (m, 3H), 7.32-7.40 (dd,  $J = 8.4, 9.2$  Hz, 4H), 11.96 (s, 1H);  $^{13}\text{C}$  NMR (100 MHz,  $\text{CDCl}_3$ )  $\delta$  21.4, 44.7, 48.5, 54.3, 55.7, 113.9, 118.6, 120.6, 126.3, 127.1, 128.1, 128.2, 128.3, 128.4, 129.0, 129.3, 129.9, 131.8, 139.8, 142.8, 144.0, 151.0, 163.3, 207.2; HRMS (ESI,  $m/z$ ): calcd. for  $\text{C}_{32}\text{H}_{28}\text{BrNO}_4\text{S}(\text{M}+\text{H})^+$ : 602.1001, found: 602.1004;  $[\alpha]_{\text{D}}^{20}$ : -69.3 ( $c$  1.6,  $\text{CHCl}_3$ ); HPLC analysis: 96% ee (Chiralcel OD-H, 10:90  $^i\text{PrOH}$ /Hexane, 0.70 mL/min),  $R_t$  (minor) = 27.4 min,  $R_t$  (major) = 28.9 min.

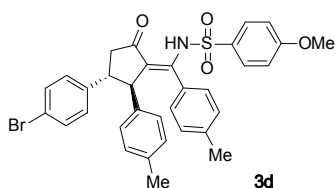

***N*-((*Z*)-((2*R*,3*R*)-3-(4-bromophenyl)-5-oxo-2-(*p*-tolyl)cyclopentylidene)(*p*-tolyl)methyl)-4-methoxybenzenesulfonamide (3d):** Yellowish thick oil, 34.5 mg, 56% yield,  $^1\text{H}$  NMR (400 MHz,  $\text{CDCl}_3$ )  $\delta$  2.23 (s, 6H), 2.51-2.57 (dd,  $J = 4.4, 18.4$  Hz, 1H), 2.91-2.98 (dd,  $J = 4.4, 18.4$  Hz, 1H), 3.19-3.22 (m, 1H), 3.71 (d,  $J = 4.4$  Hz, 1H), 3.89 (s, 3H), 6.54 (d,  $J = 8.0$  Hz, 2H), 6.60 (d,  $J = 7.6$  Hz, 2H), 6.81-6.87 (m, 8H), 7.33 (d,  $J = 8.4$  Hz, 2H), 7.04 (d,  $J = 8.8$  Hz, 2H), 11.91 (s, 1H);  $^{13}\text{C}$  NMR (100 MHz,  $\text{CDCl}_3$ )  $\delta$  21.0, 21.4, 44.5, 48.4, 53.8, 55.7, 113.9, 118.8, 120.5, 126.9, 128.1, 128.3, 128.5, 129.0(1), 129.0(6), 129.9, 131.4, 131.8, 135.9, 139.9, 141.1, 143.1, 150.7, 163.2, 207.5; HRMS (ESI,  $m/z$ ): calcd. for  $\text{C}_{33}\text{H}_{30}\text{BrNO}_4\text{S}(\text{M}+\text{H})^+$ : 616.1157, found: 616.1155;  $[\alpha]_{\text{D}}^{20}$ : -58.6 ( $c$  1.7,  $\text{CHCl}_3$ ); HPLC analysis: 90% ee (Chiralcel AS-H, 10:90  $^i\text{PrOH}$ /Hexane, 0.75 mL/min),  $R_t$  (minor) = 55.7 min,  $R_t$  (major) = 44.4 min.

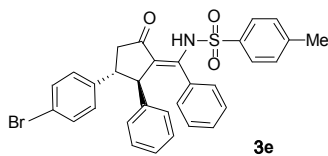

***N*-((*Z*)-((2*R*,3*R*)-3-(4-Bromophenyl)-5-oxo-2-phenylcyclopentylidene)(phenyl)methyl)-4-methylbenzenesulfonamide (3e):** Yellowish thick oil, 39.4 mg, 69% yield,  $^1\text{H}$  NMR (400 MHz,  $\text{CDCl}_3$ )  $\delta$  2.42 (s, 3H), 2.61-2.67 (dd,  $J = 6.4, 6.4$  Hz, 1H), 2.94-3.00 (dd,  $J = 8.4, 8.4$  Hz, 1H), 3.21-3.26 (m, 1H), 3.71 (d,  $J = 4.8$  Hz, 1H),

6.60-6.63 (m, 4H), 6.86 (d,  $J = 6.8$  Hz, 2H), 6.95 (t,  $J = 8.0$  Hz, 3H), 7.00 (d,  $J = 4.8$  Hz, 2H), 7.11-7.17 (m, 3H), 7.32 (t,  $J = 8.8$  Hz, 4H), 11.09 (s, 1H);  $^{13}\text{C}$  NMR (100 MHz,  $\text{CDCl}_3$ )  $\delta$  21.7, 44.8, 48.6, 54.5, 118.6, 120.6, 126.3, 127.1, 127.4, 127.6, 128.3, 128.4, 129.0, 129.4, 129.5, 130.9, 131.8, 136.9, 142.5, 143.7, 144.0, 150.7, 207.2; HRMS (ESI,  $m/z$ ): calcd. for  $\text{C}_{31}\text{H}_{26}\text{BrNO}_3\text{S}(\text{M}+\text{H})^+$ : 572.0895, found: 572.0894;  $[\alpha]_{\text{D}}^{20}$ : -78.4 ( $c$  1.7,  $\text{CHCl}_3$ ); HPLC analysis: 97% ee (Chiralcel OD-H, 10:90  $^i\text{PrOH/Hexane}$ , 0.75 mL/min),  $R_t$  (minor) = 19.9 min,  $R_t$  (major) = 23.3 min.

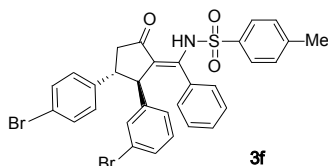

***N*-((*Z*)-((2*R*,3*R*)-2-(3-Bromophenyl)-3-(4-bromophenyl)-5-oxocyclopentylidene)(phenyl)methyl)-4-methylbenzenesulfonamide (3f)**: Yellowish thick oil, 43 mg, 66% yield,  $^1\text{H}$  NMR (400 MHz,  $\text{CDCl}_3$ )  $\delta$  2.41 (s, 3H), 2.67-2.73 (dd,  $J = 8.0, 18.0$  Hz, 1H), 2.94-3.00 (dd,  $J = 8.4, 18.0$  Hz, 1H), 3.18-3.24 (m, 1H), 3.66 (d,  $J = 6.0$  Hz, 1H), 6.52-6.60 (dd,  $J = 7.6, 7.6$  Hz, 3H), 6.68 (s, 1H), 6.83-6.87 (m, 3H), 6.96 (t,  $J = 7.6$  Hz, 2H), 7.10-7.16 (m, 4H), 7.29 (d,  $J = 8.4$  Hz, 4H), 7.34 (d,  $J = 8.4$  Hz, 4H), 12.15 (s, 1H);  $^{13}\text{C}$  NMR (100 MHz,  $\text{CDCl}_3$ )  $\delta$  21.7, 45.1, 48.8, 54.3, 117.8, 120.8, 122.3, 125.8, 127.4, 127.6, 128.4, 128.9, 129.3, 129.4, 129.6, 129.7, 130.4, 130.5, 131.8, 136.9, 141.5, 144.2, 145.6, 151.3, 206.3; HRMS (ESI,  $m/z$ ): calcd. for  $\text{C}_{31}\text{H}_{25}\text{Br}_2\text{NO}_3\text{S}(\text{M}+\text{H})^+$ : 650.0000, found: 649.9997;  $[\alpha]_{\text{D}}^{20}$ : -128.2 ( $c$  1.7,  $\text{CHCl}_3$ ); HPLC analysis: 91% ee (Chiralcel OD-H, 10:90  $^i\text{PrOH/Hexane}$ , 0.75 mL/min),  $R_t$  (minor) = 26.9 min,  $R_t$  (major) = 32.4 min.

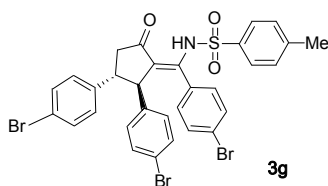

***N*-((*Z*)-((2*R*,3*R*)-2,3-bis(4-Bromophenyl)-5-oxocyclopentylidene)(4-bromophenyl)methyl)-4-methylbenzenesulfonamide (3g)**: Yellowish semi-solid, 46.5 mg, 64% yield,  $^1\text{H}$  NMR (400 MHz,  $\text{CDCl}_3$ )  $\delta$  2.44 (s, 3H), 2.65-2.72 (dd,  $J = 8.0, 8.0$  Hz, 1H), 2.89-2.96 (dd,  $J = 8.0, 8.4$  Hz, 1H), 3.19 (q,  $J = 8.0$  Hz, 1H), 3.62 (d,  $J = 4.8$  Hz, 1H), 6.46-6.49 (dd,  $J = 6.0, 6.0$  Hz, 4H), 6.83 (d,  $J = 8.4$  Hz, 2H), 7.09-7.20 (m, 6H), 7.31-7.35 (dd,  $J = 5.2, 5.2$  Hz, 4H), 12.02 (s, 1H);  $^{13}\text{C}$  NMR (100 MHz,  $\text{CDCl}_3$ )  $\delta$  21.7, 44.8, 48.9, 54.1, 118.4, 120.3, 120.9, 124.2, 127.6, 128.4, 128.9, 129.5, 129.6, 130.5, 130.7, 131.4, 131.9, 136.8, 141.3, 142.1, 144.4, 149.6, 206.5; HRMS (ESI,  $m/z$ ): calcd. for  $\text{C}_{31}\text{H}_{24}\text{Br}_3\text{NO}_3\text{S}(\text{M}+\text{H})^+$ : 727.9105, found: 727.9108;  $[\alpha]_{\text{D}}^{20}$ : -59.1 ( $c$  2.1,  $\text{CHCl}_3$ ); HPLC analysis: 92% ee (Chiralcel OD-H, 10:90  $^i\text{PrOH/Hexane}$ , 0.75 mL/min),  $R_t$  (minor) = 37.5 min,  $R_t$  (major) = 54.1 min.

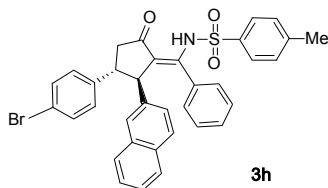

***N*-((*Z*)-((2*R*,3*R*)-3-(4-Bromophenyl)-2-(naphthalen-2-yl)-5-oxocyclopentylidene)(phenyl)methyl)-4-methylbenzenesulfonamide (3h)**: Yellowish thick oil, 37.9 mg, 61% yield,  $^1\text{H}$  NMR (400 MHz,  $\text{CDCl}_3$ )  $\delta$  2.41 (s, 3H), 2.65-2.72 (dd,  $J = 6.4, 18.4$  Hz, 1H), 2.99-3.06 (dd,  $J = 8.4, 18.4$  Hz, 1H), 3.32-3.36 (m, 1H),

3.86 (d,  $J = 4.8$  Hz, 1H), 6.60 (d,  $J = 7.6$  Hz, 2H), 6.82 (t,  $J = 7.2$  Hz, 2H), 6.88-6.94 (m, 4H), 6.99 (t,  $J = 7.2$  Hz, 1H), 7.14 (d,  $J = 8.4$  Hz, 2H), 7.30-7.33 (m, 4H), 7.35-7.41 (m, 2H), 7.48-7.50 (m, 1H), 7.57 (d,  $J = 8.4$  Hz, 1H), 7.69-7.72 (m, 1H), 12.15 (s, 1H);  $^{13}\text{C}$  NMR (100 MHz,  $\text{CDCl}_3$ )  $\delta$  21.7, 44.8, 48.3, 54.6, 118.3, 120.6, 125.3, 125.6, 125.8, 126.0, 127.3, 127.4, 127.5, 127.7, 128.3, 128.4, 128.9, 129.4, 129.5, 130.7, 131.8, 132.0, 133.0, 137.0, 140.9, 142.5, 144.1, 150.9, 207.2; HRMS (ESI,  $m/z$ ): calcd. for  $\text{C}_{35}\text{H}_{29}\text{BrNO}_3\text{S}(\text{M}+\text{H})^+$ : 622.1051, found: 622.1050;  $[\alpha]_{\text{D}}^{20}$ : -35.1 ( $c$  1.9,  $\text{CHCl}_3$ ); HPLC analysis: 92% ee (Chiralcel OD-H, 10:90  $^i\text{PrOH}$ /Hexane, 0.75 mL/min),  $R_t$  (minor) = 26.7 min,  $R_t$  (major) = 34.8 min.

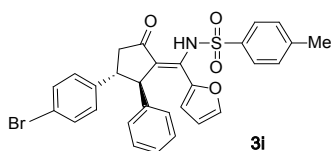

***N*-((*Z*)-((2*R*,3*R*)-3-(4-Bromophenyl)-5-oxo-2-phenylcyclopentylidene)(furan-2-yl)methyl)-4-methylbenzenesulfonamide (3i):** Yellowish thick oil, 32.6 mg, 58% yield,  $^1\text{H}$  NMR (400 MHz,  $\text{CDCl}_3$ )  $\delta$  2.47 (s, 3H), 2.50-2.56 (dd,  $J = 5.6, 18.0$  Hz, 1H), 2.85-2.92 (dd,  $J = 8.4, 18.0$  Hz, 1H), 3.17-3.21 (m, 1H), 4.23 (d,  $J = 4.4$  Hz, 1H), 6.24-6.25 (dd,  $J = 1.6, 3.6$  Hz, 1H), 6.63 (d,  $J = 3.6$  Hz, 1H), 6.75-6.77 (m, 2H), 6.85 (d,  $J = 8.4$  Hz, 2H), 7.10-7.12 (m, 3H), 7.20 (d,  $J = 1.2$  Hz, 1H), 7.27 (d,  $J = 6.4$  Hz, 3H), 7.35 (d,  $J = 8.4$  Hz, 2H), 7.54 (d,  $J = 8.0$  Hz, 2H), 11.56 (s, 1H);  $^{13}\text{C}$  NMR (100 MHz,  $\text{CDCl}_3$ )  $\delta$  21.8, 44.9, 48.7, 54.7, 112.0, 118.6, 119.6, 120.6, 126.5(3), 126.5(8), 127.7, 128.4, 128.5, 129.6, 131.8, 136.1, 138.3, 142.7, 143.6, 144.2, 144.8, 145.0, 207.8; HRMS (ESI,  $m/z$ ): calcd. for  $\text{C}_{29}\text{H}_{24}\text{BrNO}_4\text{S}(\text{M}+\text{H})^+$ : 562.0688, found: 562.0687;  $[\alpha]_{\text{D}}^{20}$ : -92.3 ( $c$  1.4,  $\text{CHCl}_3$ ); HPLC analysis: 93% ee (Chiralcel OD-H, 10:90  $^i\text{PrOH}$ /Hexane, 0.75 mL/min),  $R_t$  (minor) = 21.4 min,  $R_t$  (major) = 26.6 min.

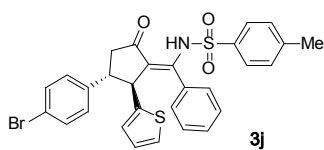

***N*-((*Z*)-((2*S*,3*R*)-3-(4-Bromophenyl)-5-oxo-2-(thiophen-2-yl)cyclopentylidene)(phenyl)methyl)-4-methylbenzenesulfonamide (3j):** Yellowish thick oil, 32.9 mg, 57% yield,  $^1\text{H}$  NMR (400 MHz,  $\text{CDCl}_3$ )  $\delta$  2.44 (s, 3H), 2.59-2.65 (dd,  $J = 4.8, 18.4$  Hz, 1H), 3.02-3.08 (dd,  $J = 8.4, 18.4$  Hz, 1H), 3.34-3.38 (m, 1H), 3.97 (d,  $J = 3.7$  Hz, 1H), 6.14 (d,  $J = 3.4$  Hz, 1H), 6.61-6.63 (dd,  $J = 3.5, 5.2$  Hz, 1H), 6.72 (d,  $J = 8.4$  Hz, 2H), 6.88 (d,  $J = 8.4$  Hz, 2H), 6.99-7.18 (m, 3H), 7.16-7.26 (m, 3H), 7.31-7.36 (m, 4H), 12.02 (s, 1H);  $^{13}\text{C}$  NMR (100 MHz,  $\text{CDCl}_3$ )  $\delta$  21.6, 44.3, 48.7, 49.4, 118.4, 120.8, 123.8, 124.5, 126.4, 127.6, 128.3, 128.9, 129.5, 129.7, 130.7, 131.8, 136.9, 142.3, 144.1, 147.3, 151.1, 206.5; HRMS (ESI,  $m/z$ ): calcd. for  $\text{C}_{29}\text{H}_{24}\text{BrNO}_3\text{S}_2(\text{M}+\text{H})^+$ : 578.0459, found: 578.0455;  $[\alpha]_{\text{D}}^{20}$ : -113.1 ( $c$  1.4,  $\text{CHCl}_3$ ); HPLC analysis: 91% ee (Chiralcel AS-H, 5:5:90  $\text{MeOH}^i\text{PrOH}$ /Hexane, 0.50 mL/min),  $R_t$  (minor) = 24.7 min,  $R_t$  (major) = 26.9 min.

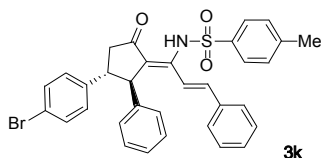

***N*-((1*Z*,2*E*)-1-((2*R*,3*R*)-3-(4-Bromophenyl)-5-oxo-2-phenylcyclopentylidene)-3-phenylallyl)-4-methylbenzenesulfonamide (3k):** Yellowish thick oil, 37.6 mg, 63% yield,  $^1\text{H}$  NMR (400 MHz,  $\text{CDCl}_3$ )  $\delta$  2.47 (s, 3H), 2.52-2.58 (dd,  $J = 6.0, 18.4$  Hz, 1H), 2.86-2.93 (dd,  $J = 8.4, 18.4$  Hz, 1H), 3.19-3.23 (m, 1H), 3.99 (d,  $J = 4.4$  Hz, 1H), 6.31 (d,  $J = 16.0$  Hz, 1H), 6.76-6.88 (m, 4H), 7.03-7.05 (dd,  $J = 2.0, 7.6$  Hz, 2H), 7.18-7.28 (m,

9H), 7.36 (d,  $J = 6.4$  Hz, 2H), 7.66 (d,  $J = 8.4$  Hz, 2H), 11.60 (s, 1H);  $^{13}\text{C}$  NMR (100 MHz,  $\text{CDCl}_3$ )  $\delta$  21.7, 44.8, 48.9, 55.3, 119.2, 119.3, 120.7, 127.0, 127.1, 127.5, 127.8, 128.5, 128.7, 129.0, 129.6, 129.7, 131.9, 135.2, 136.5, 142.4, 142.8, 143.5, 144.1, 147.3, 207.1; HRMS (ESI,  $m/z$ ): calcd. for  $\text{C}_{33}\text{H}_{29}\text{BrNO}_3\text{S}(\text{M}+\text{H})^+$ : 598.1051, found: 598.1052;  $[\alpha]_{\text{D}}^{20}$ : -56.0 ( $c$  0.9,  $\text{CHCl}_3$ ); HPLC analysis: 89% ee (Chiralcel OD-H, 10:90  $^i\text{PrOH/Hexane}$ , 0.75 mL/min),  $R_t$  (minor) = 22.6 min,  $R_t$  (major) = 25.8 min.

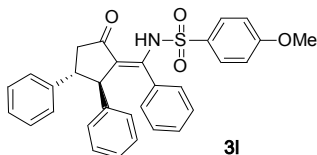

3l

**4-Methoxy-*N*-((*Z*)-((2*R*,3*R*)-5-oxo-2,3-diphenylcyclopentylidene)(phenyl)methyl)benzenesulfonamide**

**(3l)**: Yellowish thick oil, 37 mg, 73% yield,  $^1\text{H}$  NMR (400 MHz,  $\text{CDCl}_3$ )  $\delta$  2.65-2.71 (dd,  $J = 6.0, 5.6$  Hz, 1H), 2.97-3.03 (dd,  $J = 8.8, 8.8$  Hz, 1H), 3.25-3.30 (m, 1H), 3.78 (d,  $J = 4.4$  Hz, 1H), 3.86 (s, 3H), 6.63-6.68 (m, 4H), 6.82 (d,  $J = 7.2$  Hz, 2H), 6.94-7.03 (m, 7H), 7.11-7.23 (m, 4H), 7.36 (d,  $J = 8.8$  Hz, 2H), 12.06 (s, 1H);  $^{13}\text{C}$  NMR (100 MHz,  $\text{CDCl}_3$ )  $\delta$  45.1, 49.0, 54.4, 55.7, 113.9, 119.0, 126.2, 126.6, 126.8, 127.1, 127.4, 128.2, 128.7, 129.0, 129.4, 129.8, 131.2, 131.5, 143.7, 144.3, 150.4, 163.2, 207.8; HRMS (ESI,  $m/z$ ): calcd. for  $\text{C}_{31}\text{H}_{27}\text{NO}_4\text{S}(\text{M}+\text{H})^+$ : 510.1739, found: 510.1738;  $[\alpha]_{\text{D}}^{20}$ : -30.0 ( $c$  2.1,  $\text{CHCl}_3$ ); HPLC analysis: 96% ee (Chiralcel OD-H, 10:90  $^i\text{PrOH/Hexane}$ , 0.75 mL/min),  $R_t$  (minor) = 22.9 min,  $R_t$  (major) = 26.2 min.

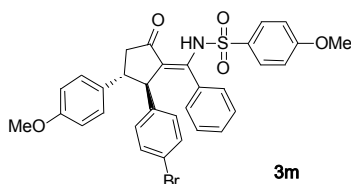

3m

***N*-((*Z*)-((2*R*,3*R*)-2-(4-Bromophenyl)-3-(4-methoxyphenyl)-5-oxocyclopentylidene)(phenyl)methyl)-4-**

**methoxybenzenesulfonamide (3m)**: Yellowish thick oil, 41.8 mg, 68% yield,  $^1\text{H}$  NMR (400 MHz,  $\text{CDCl}_3$ )  $\delta$  2.65-2.72 (dd,  $J = 7.6, 7.6$  Hz, 1H), 2.89-2.96 (dd,  $J = 8.4, 8.4$  Hz, 1H), 3.15 (q,  $J = 8.0$  Hz, 1H), 3.69 (d,  $J = 6.0$  Hz, 1H), 3.75 (s, 3H), 3.85 (s, 3H), 6.46-6.49 (m, 2H), 6.64 (d,  $J = 7.2$  Hz, 2H), 6.76 (d,  $J = 6.8$  Hz, 2H), 6.80 (d,  $J = 7.2$  Hz, 2H), 6.88 (d,  $J = 6.8$  Hz, 4H), 6.97 (t,  $J = 7.6$  Hz, 2H), 7.06-7.16 (m, 5H), 7.31 (d,  $J = 7.2$  Hz, 2H), 12.09 (s, 1H);  $^{13}\text{C}$  NMR (100 MHz,  $\text{CDCl}_3$ )  $\delta$  45.3, 48.6, 54.4, 55.2, 55.7, 113.9, 114.1, 118.5, 119.8, 127.4, 127.7, 128.9, 129.0, 129.5, 129.8, 130.9, 131.1, 131.5, 134.7, 142.9, 150.7, 158.4, 163.2, 207.2; HRMS (ESI,  $m/z$ ): calcd. for  $\text{C}_{32}\text{H}_{28}\text{BrNO}_5\text{S}(\text{M}+\text{H})^+$ : 618.0950, found: 618.0952;  $[\alpha]_{\text{D}}^{20}$ : -58.4 ( $c$  2.0,  $\text{CHCl}_3$ ); HPLC analysis: 93% ee (Chiralcel OD-H, 10:90  $^i\text{PrOH/Hexane}$ , 0.75 mL/min),  $R_t$  (minor) = 49.7 min,  $R_t$  (major) = 70.3 min.

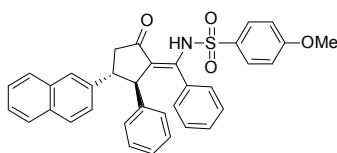

3n

***N*-((*Z*)-((2*R*,3*R*)-2-Phenyl-3-(naphthalen-2-yl)-5-oxocyclopentylidene)(phenyl)methyl)-4-methoxy**

**benzenesulfonamide (3n)**: Yellowish thick oil, 39.6 mg, 71% yield,  $^1\text{H}$  NMR (400 MHz,  $\text{CDCl}_3$ )  $\delta$  2.77-2.83 (dd,  $J = 6.4, 18.4$  Hz, 1H), 3.04-3.11 (dd,  $J = 8.4, 18.4$  Hz, 1H), 3.42-3.47 (m, 1H), 3.85 (s, 3H), 3.88 (d,  $J = 4.4$  Hz, 1H), 6.75 (t,  $J = 3.6$  Hz, 4H), 6.81 (d,  $J = 8.8$  Hz, 2H), 6.95 (t,  $J = 7.6$  Hz, 2H), 7.03 (d,  $J = 2.0$  Hz, 3H), 7.10-7.16 (m, 2H), 7.36 (d,  $J = 8.8$  Hz, 2H), 7.43-7.45 (m, 3H), 7.68-7.77 (m, 3H), 12.10 (s, 1H);  $^{13}\text{C}$

NMR (100 MHz, CDCl<sub>3</sub>)  $\delta$  45.0, 49.1, 54.3, 55.7, 113.9, 118.9, 125.0, 125.1, 125.8, 126.2, 126.3, 127.1, 127.4, 127.6, 127.7, 128.3, 128.6, 129.0, 129.4, 129.8, 131.1, 131.5, 132.3, 133.3, 141.1, 144.3, 150.6, 163.2, 207.7; HRMS (ESI, m/z): calcd. for C<sub>35</sub>H<sub>29</sub>NO<sub>4</sub>S(M+H)<sup>+</sup>: 560.1896, found: 560.1894; [ $\alpha$ ]<sub>D</sub><sup>20</sup>: -143.2 (*c* 1.5, CHCl<sub>3</sub>); HPLC analysis: 92% ee (Chiralcel AS-H, 10:90 <sup>i</sup>PrOH/Hexane, 0.75 mL/min), R<sub>t</sub> (minor) = 65.2 min, R<sub>t</sub> (major) = 92.0 min.

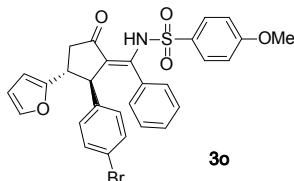

**N-((Z)-((2R,3R)-2-(4-bromophenyl)-3-(furan-2-yl)-5-oxocyclopentylidene)(phenyl)methyl)-4-methoxybenzenesulfonamide (3o)**: Yellowish thick oil, 35.7 mg, 62% yield, <sup>1</sup>H NMR (400 MHz, CDCl<sub>3</sub>)  $\delta$  2.69-2.75 (dd, *J* = 6.4, 18.4 Hz, 1H), 2.83-2.89 (dd, *J* = 8.4, 8.4 Hz, 1H), 3.24-3.29 (m, 1H), 3.85 (s, 3H), 3.86 (d, *J* = 5.2 Hz, 1H), 5.84 (d, *J* = 3.2 Hz, 1H), 6.22 (d, *J* = 2.0 Hz, 1H), 6.57 (d, *J* = 8.4 Hz, 2H), 6.66 (d, *J* = 7.6 Hz, 2H), 6.79 (d, *J* = 8.8 Hz, 2H), 7.02 (t, *J* = 7.6 Hz, 2H), 7.14-7.19 (m, 3H), 7.26-7.32 (m, 3H), 11.97 (s, 1H); <sup>13</sup>C NMR (100 MHz, CDCl<sub>3</sub>)  $\delta$  42.5, 42.6, 50.8, 55.7, 105.6, 110.2, 113.9, 117.7, 120.1, 127.5, 128.9, 129.0, 129.6, 129.8, 130.9, 131.3, 131.4, 141.9, 142.6, 150.9, 155.3, 163.3, 206.3; HRMS (ESI, m/z): calcd. for C<sub>29</sub>H<sub>24</sub>BrNO<sub>5</sub>S(M+H)<sup>+</sup>: 578.0637, found: 578.0635; [ $\alpha$ ]<sub>D</sub><sup>20</sup>: +22.6 (*c* 1.7, CHCl<sub>3</sub>); HPLC analysis: 90% ee (Chiralcel OD-H, 10:90 <sup>i</sup>PrOH/Hexane, 0.75 mL/min), R<sub>t</sub> (minor) = 26.1 min, R<sub>t</sub> (major) = 47.5 min.

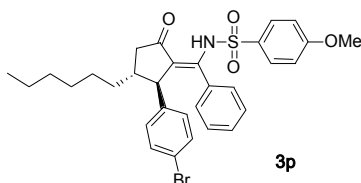

**N-((Z)-((2R,3R)-2-(4-Bromophenyl)-3-hexyl-5-oxocyclopentylidene)(phenyl)methyl)-4-methoxybenzenesulfonamide (3p)**: Yellowish thick oil, 32.5 mg, 55% yield, <sup>1</sup>H NMR (400 MHz, CDCl<sub>3</sub>)  $\delta$  0.83 (t, *J* = 7.2 Hz, 3H), 1.16-1.37 (m, 10H), 1.94-1.98 (m, 1H), 2.15-2.21 (dd, *J* = 6.8, 6.8 Hz, 1H), 2.64-2.71 (dd, *J* = 7.6, 8.0 Hz, 1H), 3.34 (d, *J* = 5.2 Hz, 1H), 3.85 (s, 3H), 6.50 (d, *J* = 8.4 Hz, 2H), 6.65 (d, *J* = 7.2 Hz, 2H), 6.79 (d, *J* = 6.8 Hz, 2H), 7.01 (t, *J* = 8.0 Hz, 2H), 7.12 (d, *J* = 6.8 Hz, 2H), 7.19 (t, *J* = 7.6 Hz, 1H), 7.26-7.32 (m, 2H), 11.98 (s, 1H); <sup>13</sup>C NMR (100 MHz, CDCl<sub>3</sub>)  $\delta$  14.0, 22.5, 27.4, 29.1, 31.6, 34.9, 43.9, 51.8, 55.7, 113.9, 119.0, 119.6, 127.4, 128.9, 129.0, 129.4, 129.8, 131.1, 131.5, 143.8, 150.3, 163.2, 208.0; HRMS (ESI, m/z): calcd. for C<sub>31</sub>H<sub>34</sub>BrNO<sub>4</sub>S(M+H)<sup>+</sup>: 596.1470, found: 596.1473; [ $\alpha$ ]<sub>D</sub><sup>20</sup>: +261.9 (*c* 1.1, CHCl<sub>3</sub>); HPLC analysis: 92% ee (Chiralcel OD-H, 10:90 <sup>i</sup>PrOH/Hexane, 0.75 mL/min), R<sub>t</sub> (minor) = 13.4 min, R<sub>t</sub> (major) = 22.2 min.

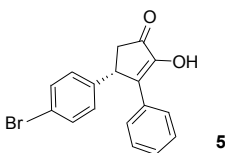

**(S)-4-(4-Bromophenyl)-2-hydroxy-3-phenylcyclopent-2-enone (5)**: White solid, 24 mg, 73% yield, <sup>1</sup>H NMR (400 MHz, CDCl<sub>3</sub>)  $\delta$  2.32-2.37 (dd, *J* = 1.2, 19.2 Hz, 1H), 3.07-3.14 (dd, *J* = 6.8, 19.2 Hz, 1H), 4.47-4.49 (dd, *J* = 1.2, 6.8 Hz, 1H), 6.42 (s, 1H), 7.06 (d, *J* = 8.4 Hz, 2H), 7.30-7.39 (m, 5H), 7.74-7.76 (dd, *J* = 1.2, 8.4 Hz, 2H); <sup>13</sup>C NMR (100 MHz, CDCl<sub>3</sub>)  $\delta$  41.1, 42.3, 120.7, 128.5, 128.7, 128.8, 129.3, 132.2, 132.5, 138.9, 142.4, 149.2, 201.5; HRMS (ESI, m/z): calcd. for C<sub>17</sub>H<sub>13</sub>BrO<sub>2</sub>(M+H)<sup>+</sup>: 329.0177, found: 329.0174; [ $\alpha$ ]<sub>D</sub><sup>20</sup>:

+152.1 (*c* 1.0, CHCl<sub>3</sub>); HPLC analysis: 96% ee (Chiralcel IA, 10:90 <sup>1</sup>PrOH/Hexane, 0.50 mL/min), R<sub>t</sub> (minor) = 17.8 min, R<sub>t</sub> (major) = 25.5 min.

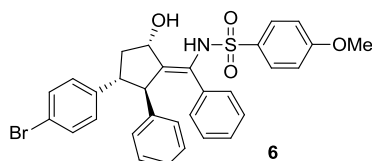

***N*-((*Z*)-((*2R,3R,5S*)-3-(4-bromophenyl)-5-hydroxy-2-phenylcyclopentylidene)(phenyl)methyl)-4-methoxybenzenesulfonamide (6):** Colorless oil, 53 mg, 91% yield, <sup>1</sup>H NMR (400 MHz, CDCl<sub>3</sub>) δ 1.87-1.94 (m, 1H), 2.43 (s, br, 1H), 2.46-2.52 (m, 1H), 2.96-3.00 (m, 1H), 3.68 (d, *J* = 4.4 Hz, 1H), 3.88 (s, 3H), 5.00 (s, 1H), 6.54-6.56 (m, 2H), 6.83-7.07 (m, 12H), 7.31 (d, *J* = 8.4 Hz, 2H), 7.53 (d, *J* = 8.8 Hz, 2H), 8.38 (s, br, 1H); <sup>13</sup>C NMR (100 MHz, CDCl<sub>3</sub>) δ 41.8, 51.2, 55.4, 55.7, 74.9, 113.9, 120.3, 126.0, 127.4, 127.5, 128.1, 128.2, 128.8, 129.3, 129.7, 131.6, 131.9, 134.7, 134.9, 135.2, 142.5, 144.8, 162.9; HRMS (ESI, *m/z*): calcd. for C<sub>31</sub>H<sub>29</sub>BrNO<sub>4</sub>S(M+H)<sup>+</sup>: 590.1001, found: 590.1005; [α]<sub>D</sub><sup>20</sup>: -190.8 (*c* 1.25, CHCl<sub>3</sub>); HPLC analysis: 94% ee (Chiralcel OD-H, 20:80 <sup>1</sup>PrOH/Hexane, 0.60 mL/min), R<sub>t</sub> (minor) = 20.8 min, R<sub>t</sub> (major) = 19.2 min.

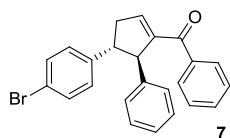

**(*3S,4R*)-2-Benzoyl-4-(4-bromophenyl)-3-phenylcyclopentanone (7):** Yellowish thick oil, 35 mg, 87% yield, <sup>1</sup>H NMR (400 MHz, CDCl<sub>3</sub>) δ 2.72-2.79 (m, 1H), 2.21-2.28 (m, 1H), 3.42-3.46 (m, 1H), 4.42-4.44 (m, 1H), 6.67 (d, *J* = 2.0 Hz, 1H), 7.06 (d, *J* = 7.2 Hz, 2H), 7.11-7.17 (m, 3H), 7.21-7.24 (m, 2H), 7.40-7.47 (m, 4H), 7.54 (t, *J* = 8.4 Hz, 1H), 7.83 (d, *J* = 8.4 Hz, 2H); <sup>13</sup>C NMR (100 MHz, CDCl<sub>3</sub>) δ 41.6, 53.5, 59.9, 120.3, 126.6, 127.2, 128.3, 128.6, 128.9, 129.1, 131.7, 132.4, 138.2, 143.2, 143.4, 143.7, 146.0, 192.9; HRMS (ESI, *m/z*): calcd. for C<sub>24</sub>H<sub>19</sub>BrO(M+H)<sup>+</sup>: 403.0698, found: 403.0698; [α]<sub>D</sub><sup>20</sup>: -144.6 (*c* 0.7, CHCl<sub>3</sub>); HPLC analysis: 90% ee (Chiralcel OD-H, 10:90 <sup>1</sup>PrOH/Hexane, 0.50 mL/min), R<sub>t</sub> (minor) = 16.2 min, R<sub>t</sub> (major) = 13.5 min.

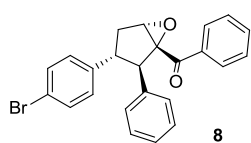

**((*1R,2R,3R,5S*)-3-(4-bromophenyl)-2-phenyl-6-oxabicyclo[3.1.0]hexan-1-yl)(phenyl)methanone (8):** Colorless wax, 26 mg, 67% yield, <sup>1</sup>H NMR (400 MHz, CDCl<sub>3</sub>) δ 2.16 (dd, *J* = 10.8, 15.6 Hz, 1H), 2.66 (dd, *J* = 7.2, 15.6 Hz, 1H), 3.11-3.18 (m, 1H), 3.80 (s, 1H), 3.98 (d, *J* = 10.8 Hz, 1H), 7.00 (d, *J* = 4.0 Hz, 2H), 7.15-7.28 (m, 5H), 7.35-7.53 (m, 5H), 7.96 (d, *J* = 7.6 Hz, 2H); <sup>13</sup>C NMR (100 MHz, CDCl<sub>3</sub>) δ 36.2, 46.5, 53.7, 60.6, 72.4, 120.6, 127.2, 128.1, 128.3, 128.5, 129.3, 129.6, 131.5, 133.3, 135.3, 138.1, 139.6, 196.3; HRMS (ESI, *m/z*): calcd. for C<sub>24</sub>H<sub>20</sub>BrO<sub>2</sub>(M+H)<sup>+</sup>: 419.0647, found: 419.0644; [α]<sub>D</sub><sup>20</sup>: -98.6 (*c* 0.6, CHCl<sub>3</sub>); HPLC analysis: 88% ee (Chiralcel IC, 10:90 <sup>1</sup>PrOH/Hexane, 0.60 mL/min), R<sub>t</sub> (minor) = 18.6 min, R<sub>t</sub> (major) = 17.5 min.

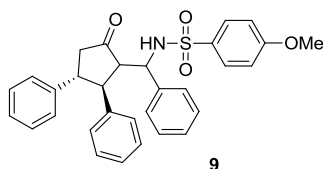

**4-methoxy-N-(((2*S*,3*R*)-5-oxo-2,3-diphenylcyclopentyl)(phenyl)methyl)benzenesulfonamide (9):**

Colorless oil, 41 mg, 83% yield,  $^1\text{H}$  NMR (400 MHz,  $\text{CDCl}_3$ )  $\delta$  2.19 (dd,  $J = 12.8, 19.2$  Hz, 1H major), 2.42 (dd,  $J = 11.6, 19.2$  Hz, 1H major), 2.72-2.88 (m, 1H major, 0.68x2H minor), 2.99 (d,  $J = 7.6$  Hz, 1H major), 3.07 (dd,  $J = 4.8, 12.4$  Hz, 0.68x1H minor), 3.17-3.36 (m, 1H major, 0.68x3H minor), 3.77 (s, 3H major), 3.80 (s, 0.68x3H minor), 4.41 (dd,  $J = 4.8, 9.2$  Hz, 0.68x1H minor), 4.63 (dd,  $J = 2.4, 9.2$  Hz, 1H major), 5.34 (d,  $J = 9.6$  Hz, 1H major), 6.67-6.74 (m, 3H major, 0.68x3H minor), 6.88-6.96 (m, 7.3H major+minor), 7.05-7.08 (m, 6.7H major+minor), 7.13-7.24 (m, 8.2H major+minor), 7.43 (d,  $J = 8.8$  Hz, 0.68x2H minor), 7.50 (d,  $J = 7.2$  Hz, 1H major);  $^{13}\text{C}$  NMR (100 MHz,  $\text{CDCl}_3$ )  $\delta$  46.5, 47.3, 48.1, 48.7, 53.2, 53.3, 55.5, 55.9, 56.8, 60.1, 63.4, 113.8, 113.9, 126.9(1), 126.9(7), 127.0, 127.2, 127.3, 127.4, 127.5, 127.6, 127.8, 127.9, 128.3, 128.4, 128.5, 128.6, 128.8, 128.9, 129.2, 131.9, 132.6, 137.4, 138.2, 138.9, 139.2, 139.6, 140.0, 162.4, 162.7, 214.8, 217.8; HRMS (ESI,  $m/z$ ): calcd. for  $\text{C}_{31}\text{H}_{30}\text{NO}_4\text{S}(\text{M}+\text{H})^+$ : 512.1896, found: 512.1894;  $[\alpha]_{\text{D}}^{20}$ : -57.9 ( $c$  0.7,  $\text{CHCl}_3$ ); HPLC analysis: (Chiralcel AD-H, 20:80  $^i\text{PrOH}$ /Hexane, 0.6 mL/min), 93% ee (major),  $R_t$  (minor) = 41.5 min,  $R_t$  (major) = 61.0 min; 92% ee (minor),  $R_t$  (minor) = 71.6 min,  $R_t$  (major) = 87.1 min.



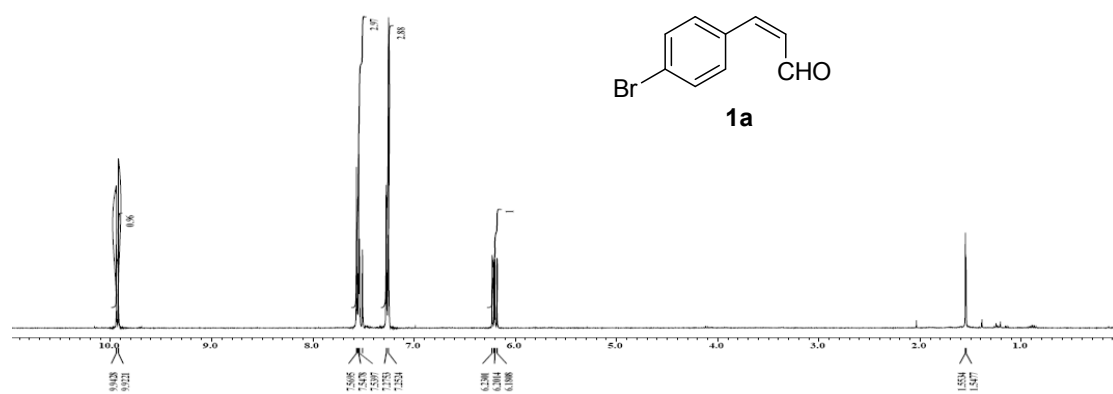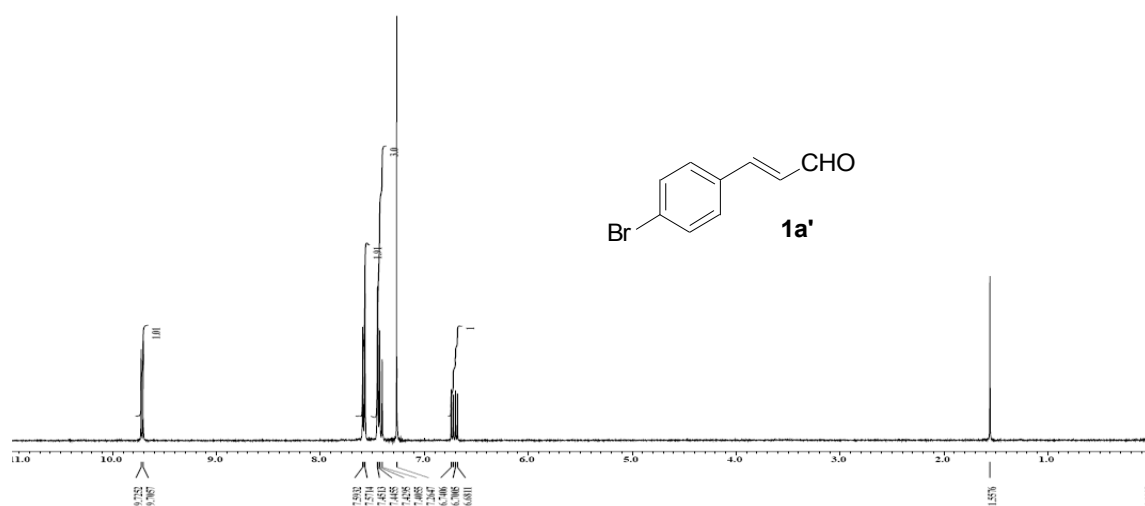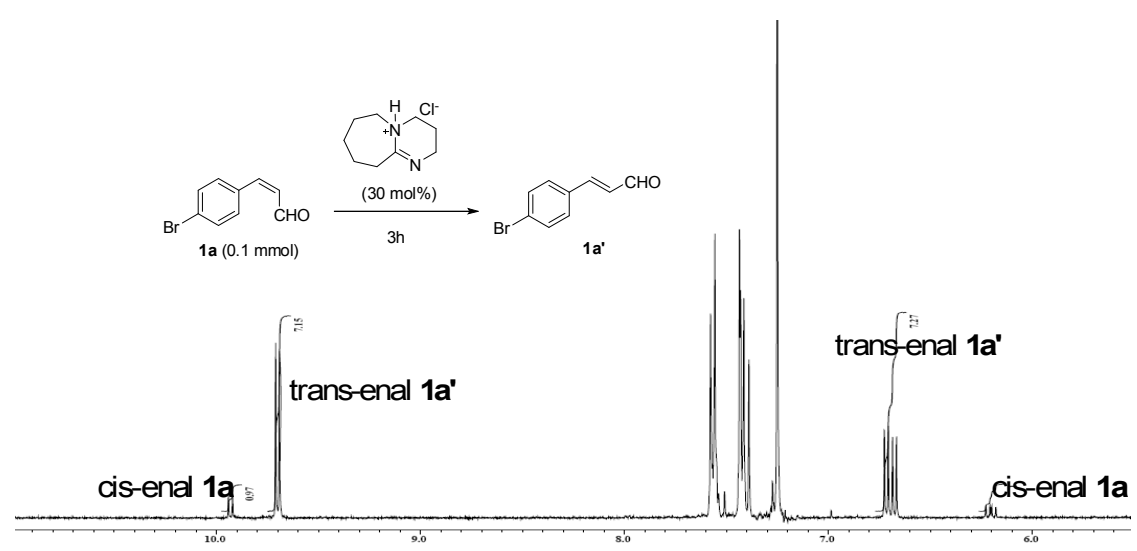

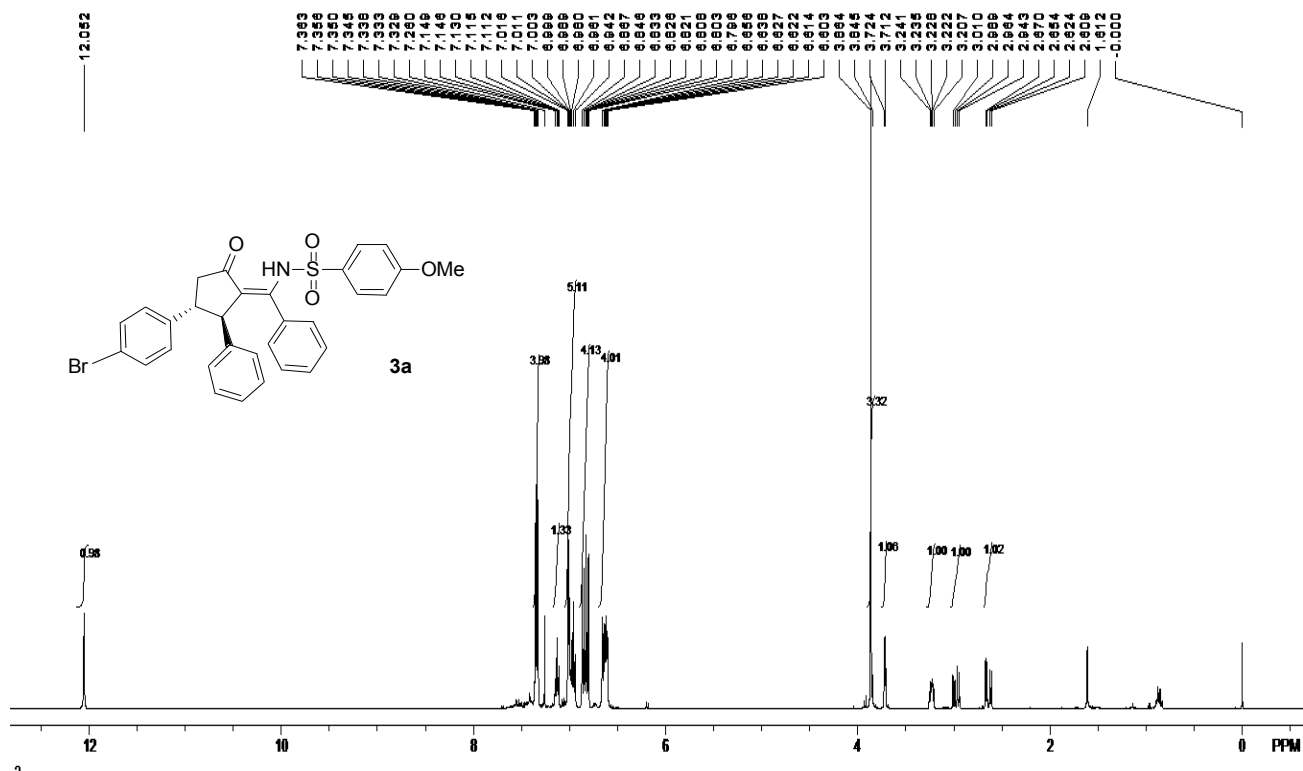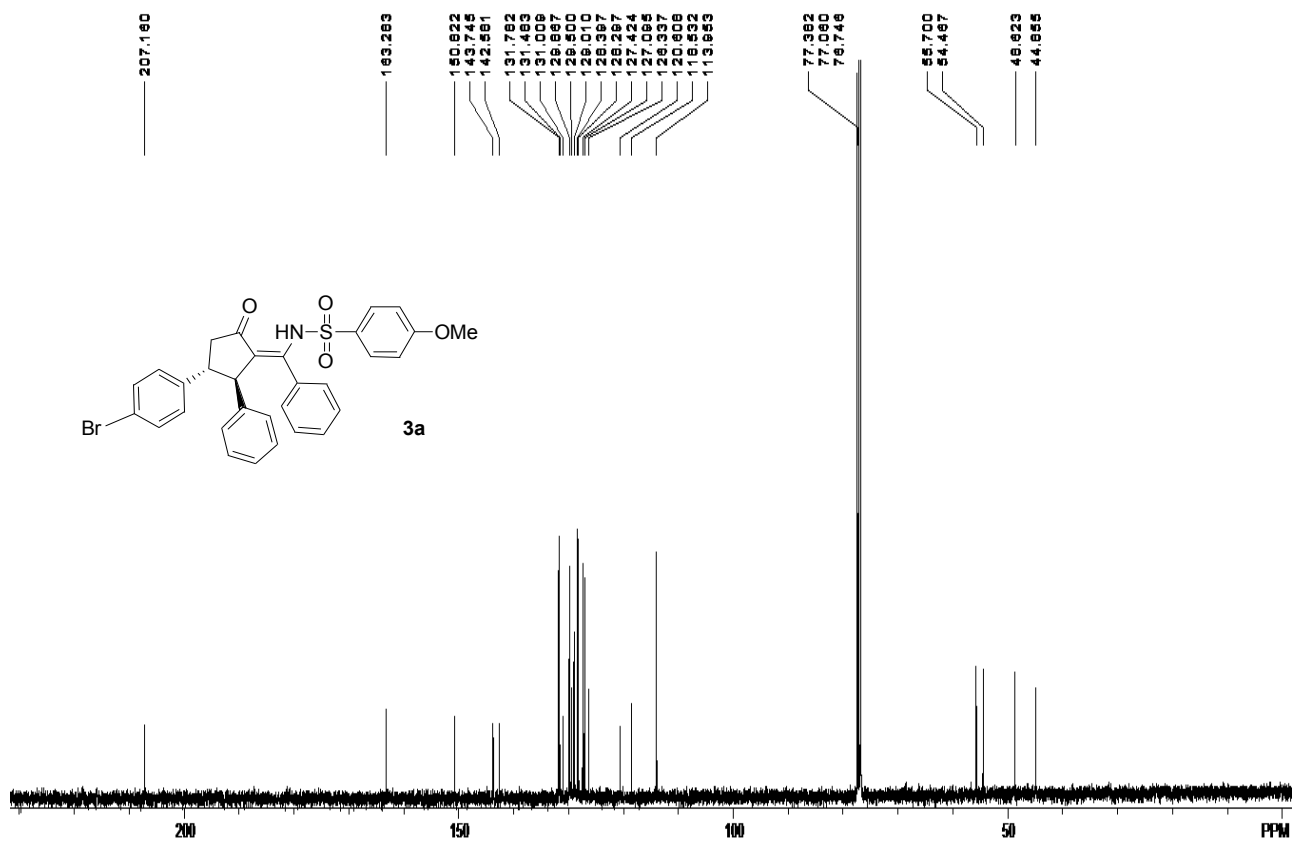

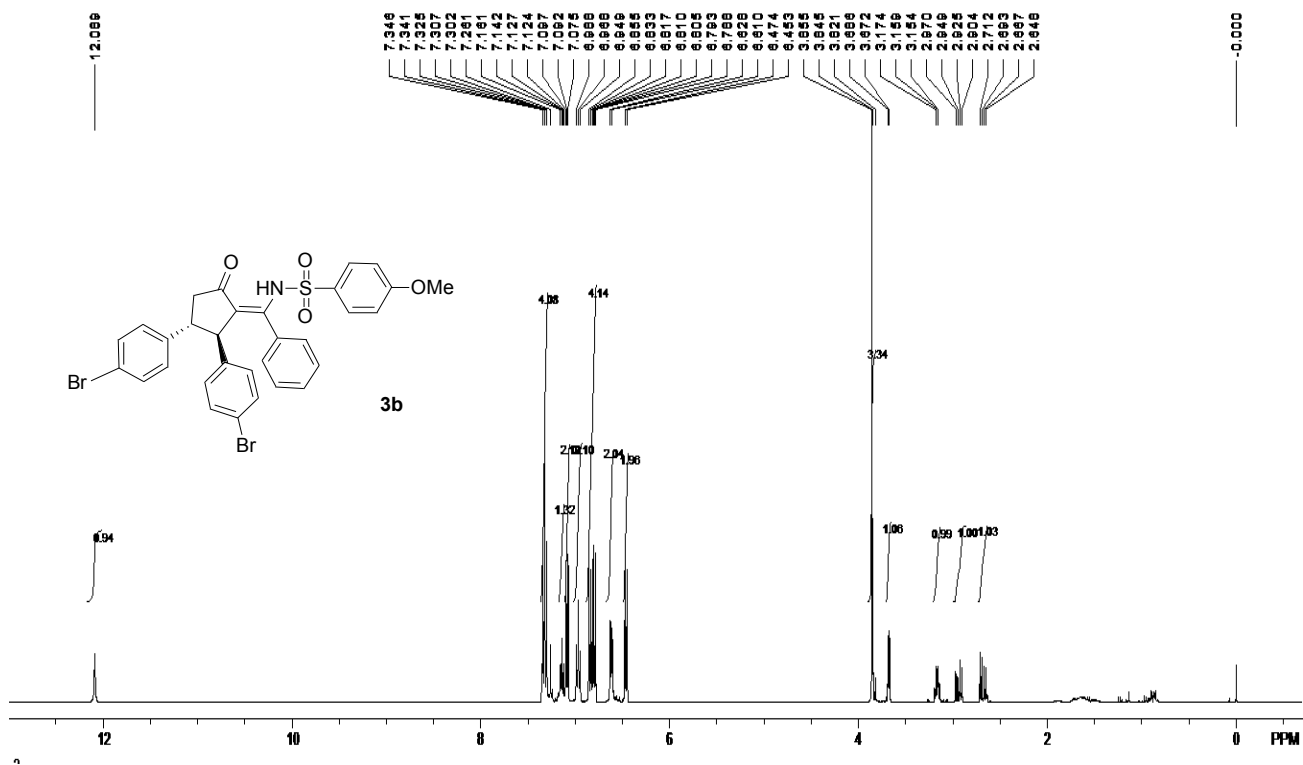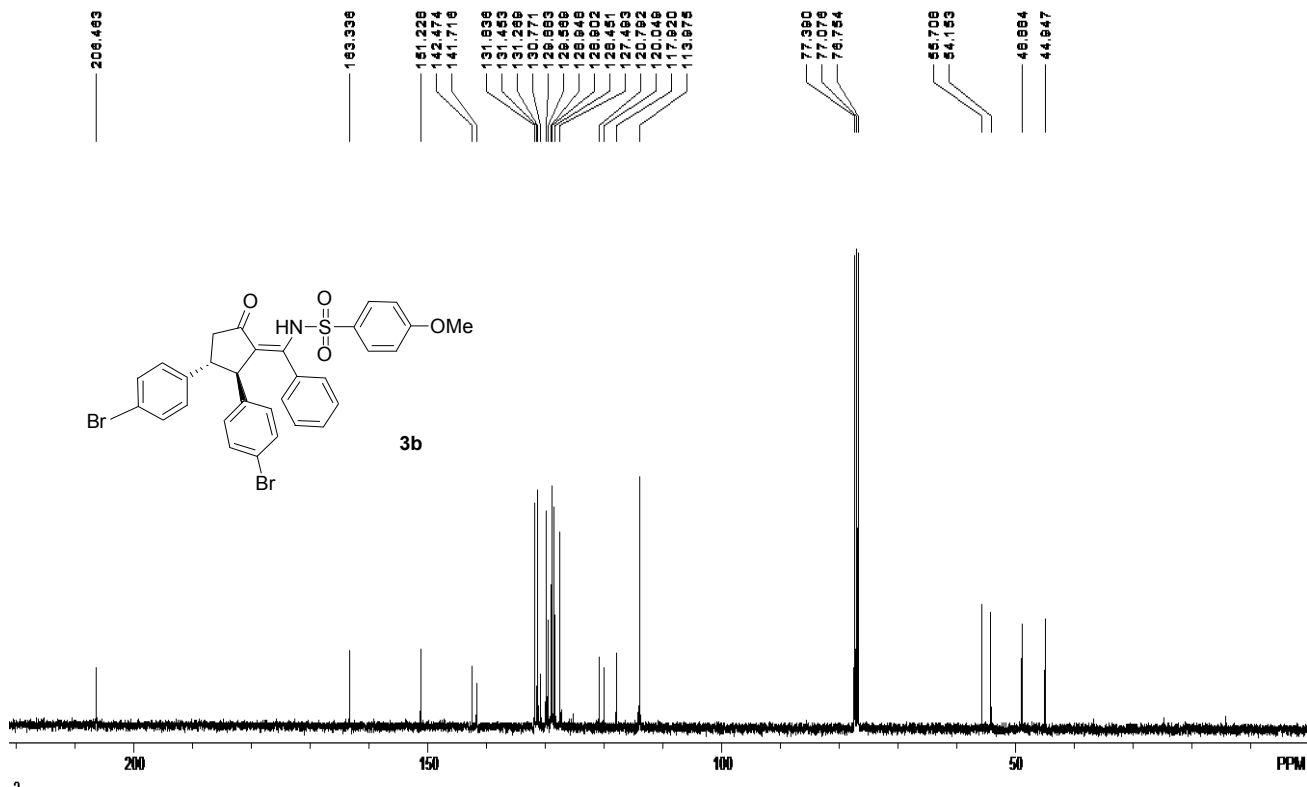

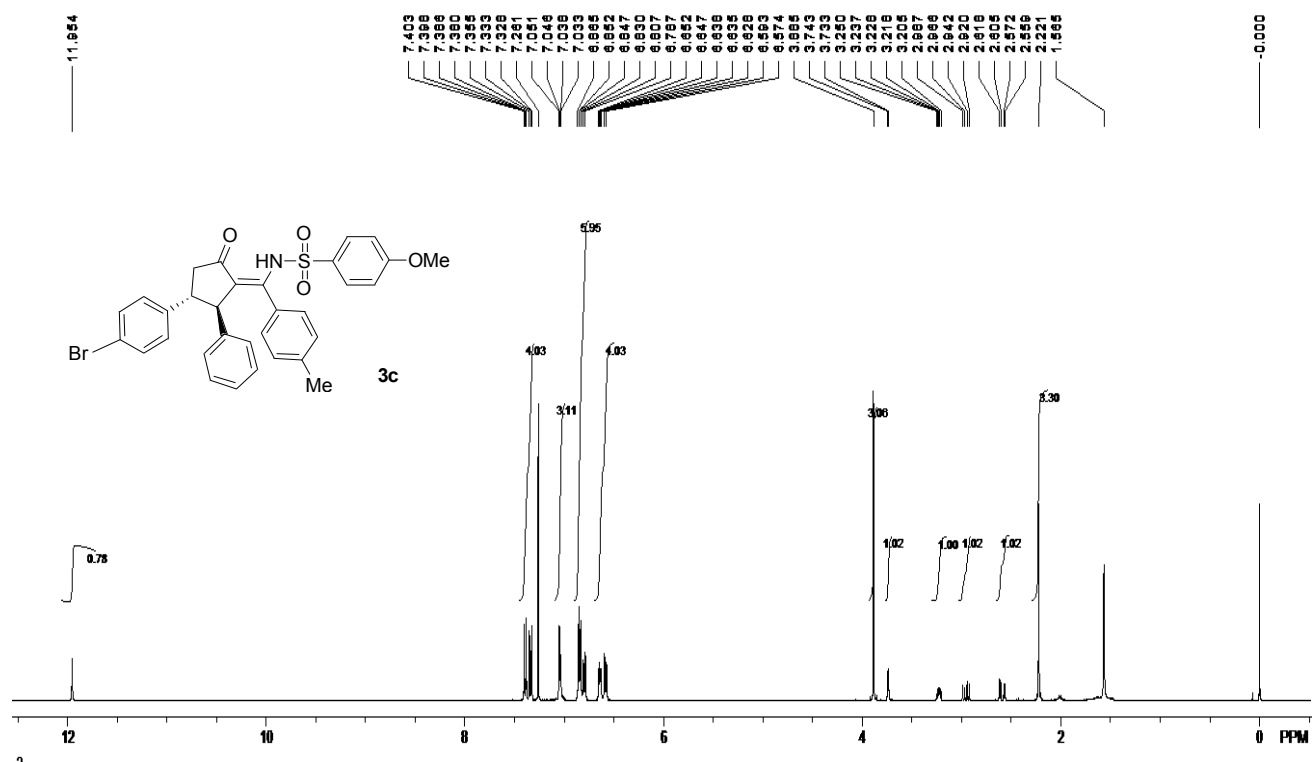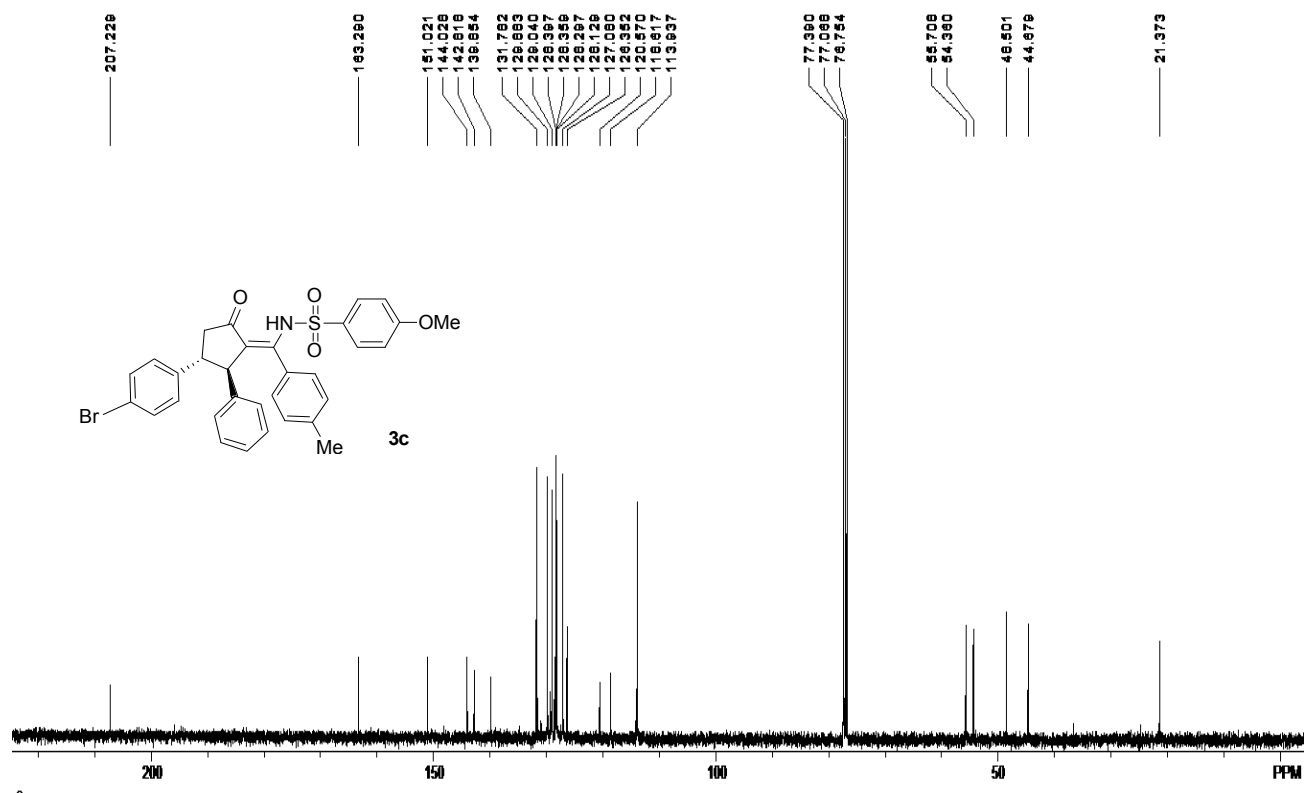

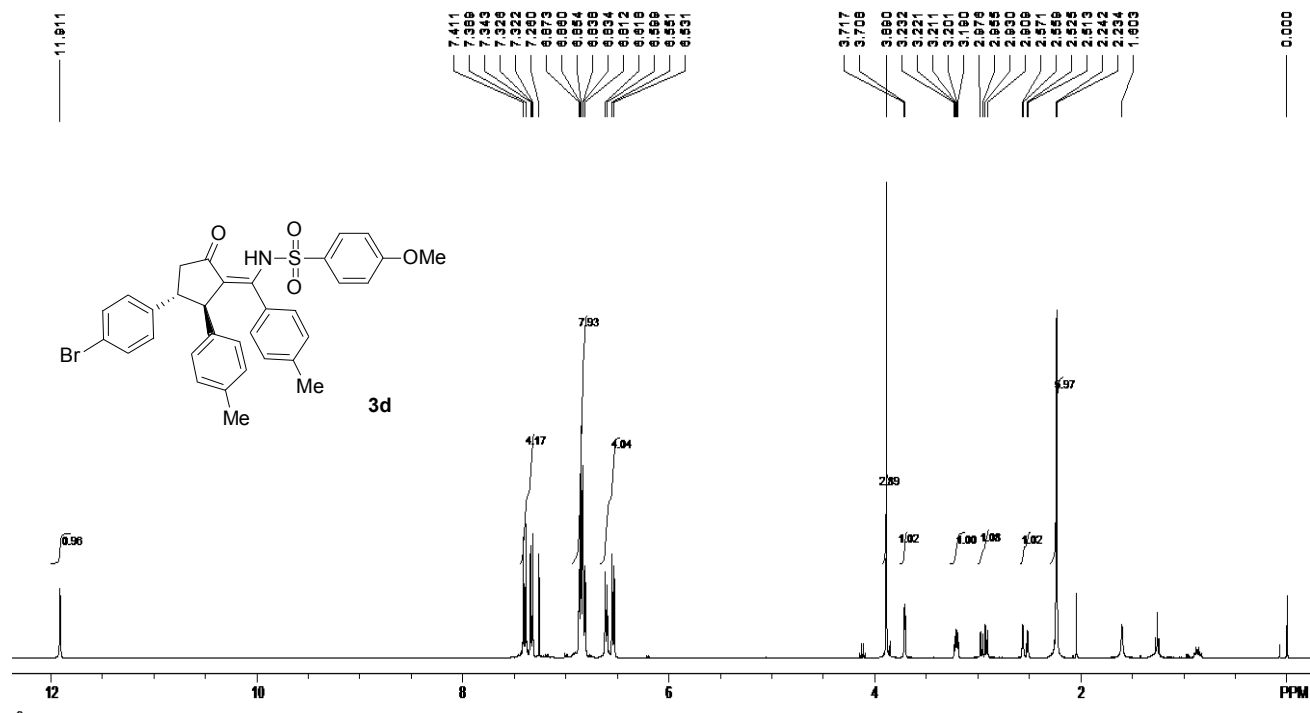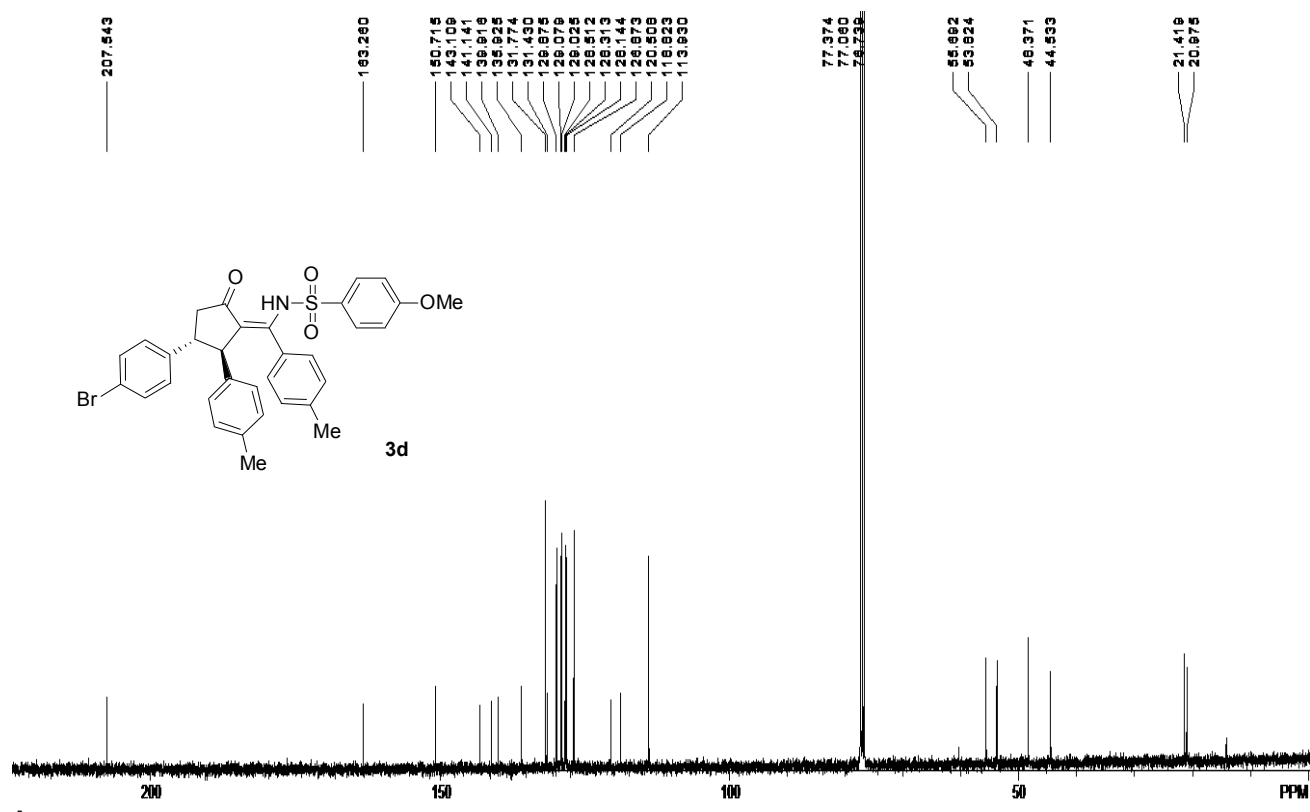

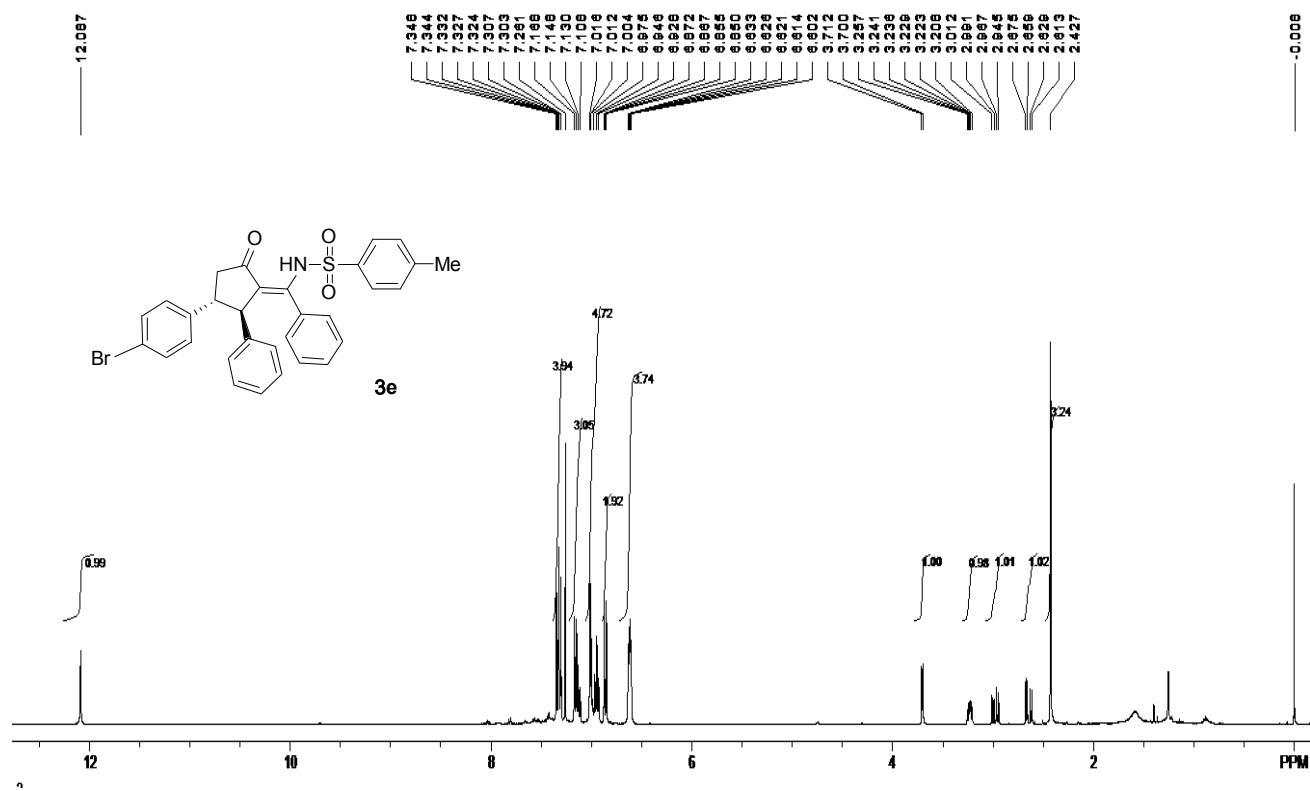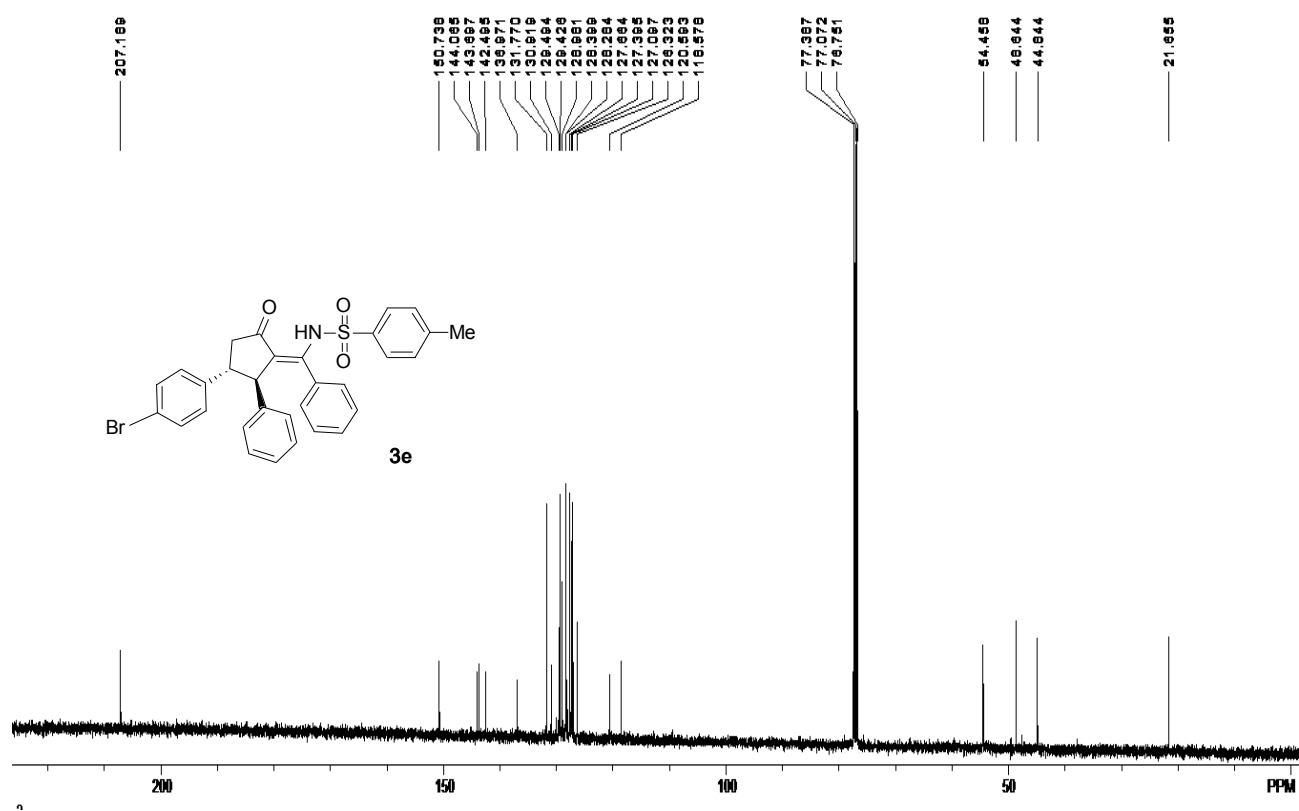

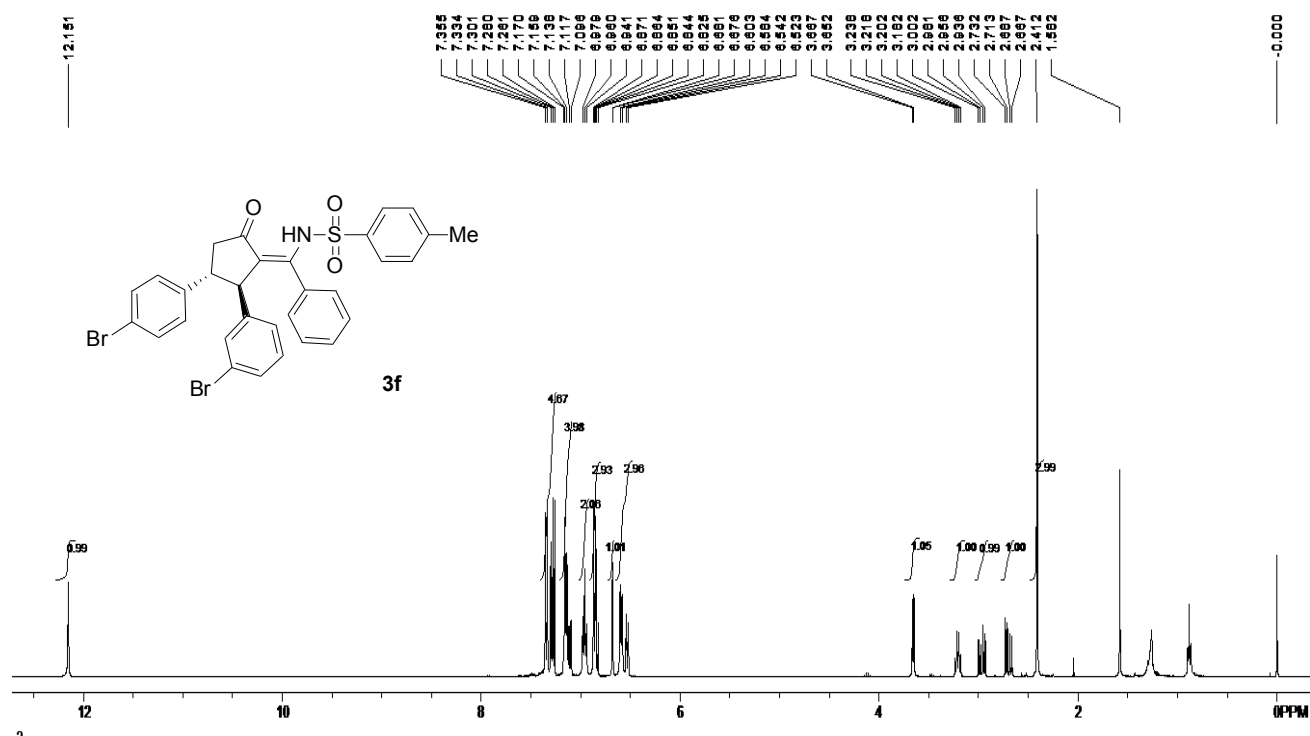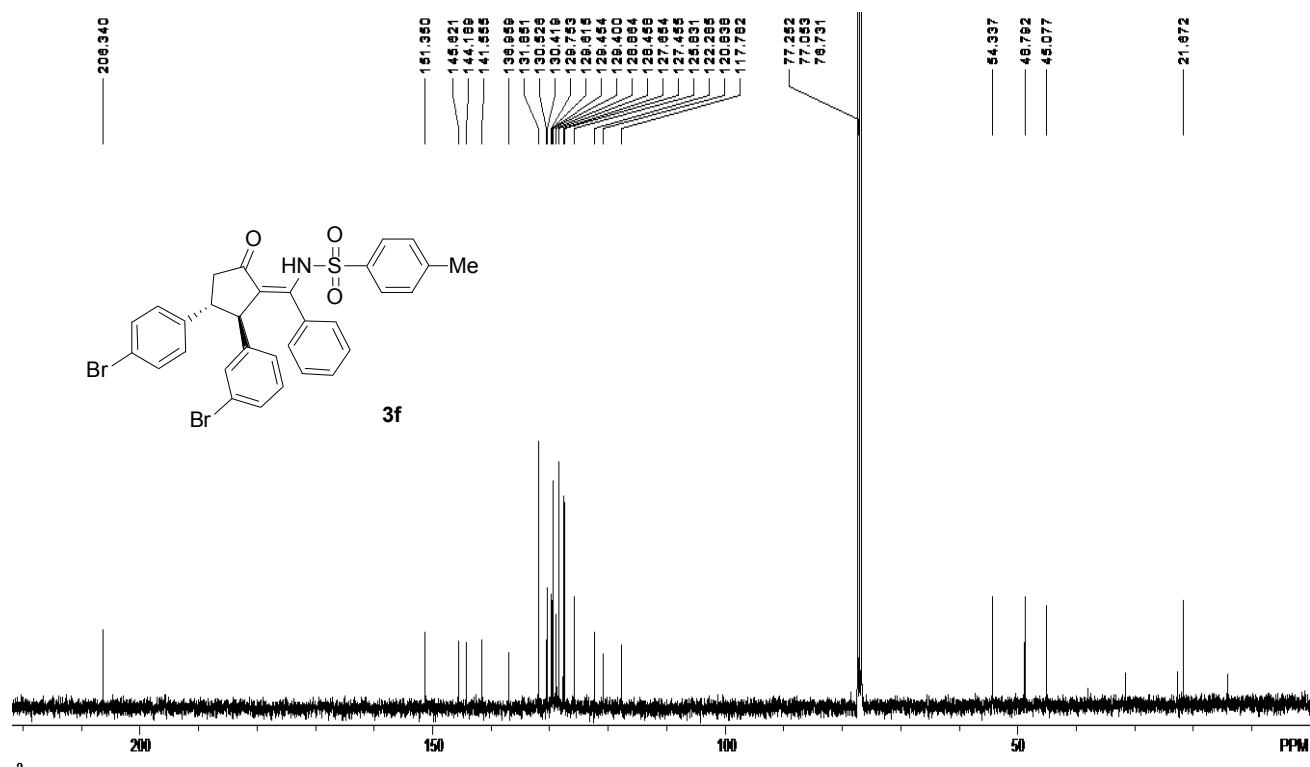

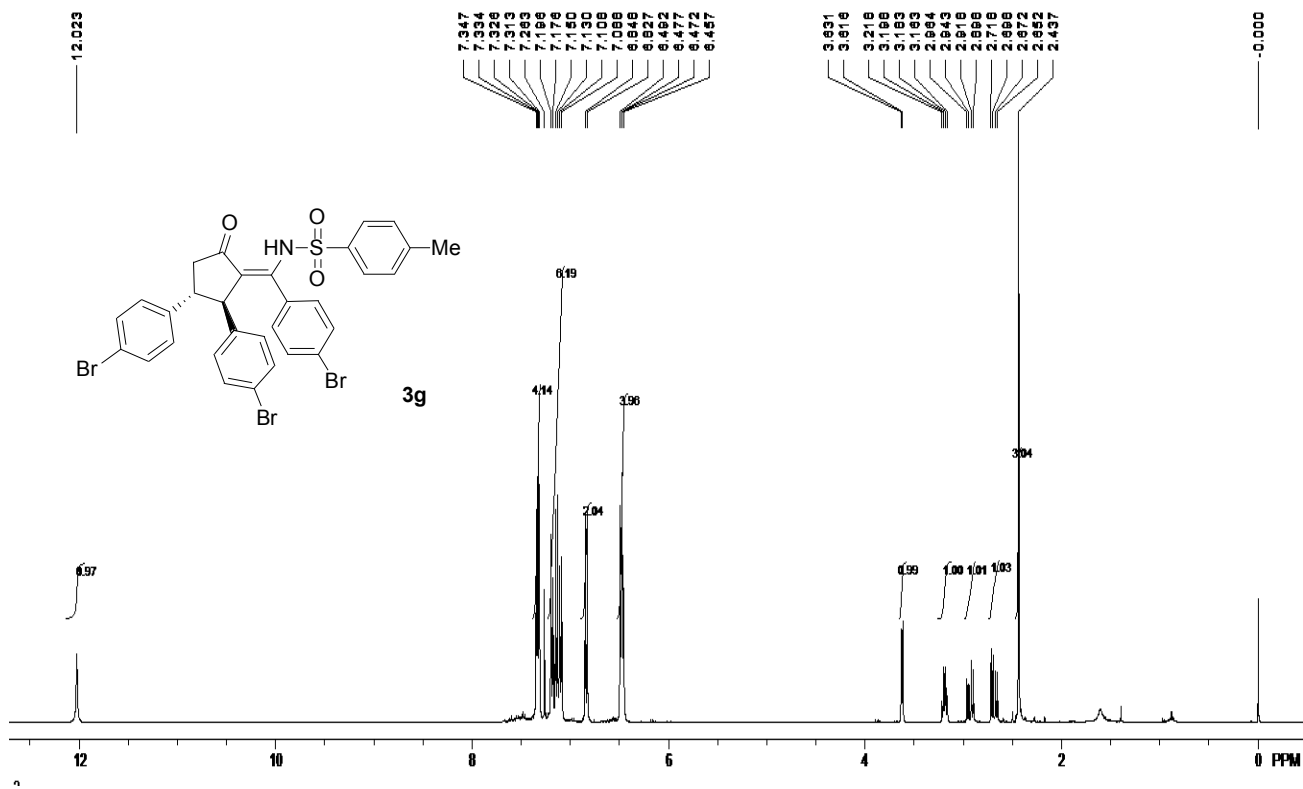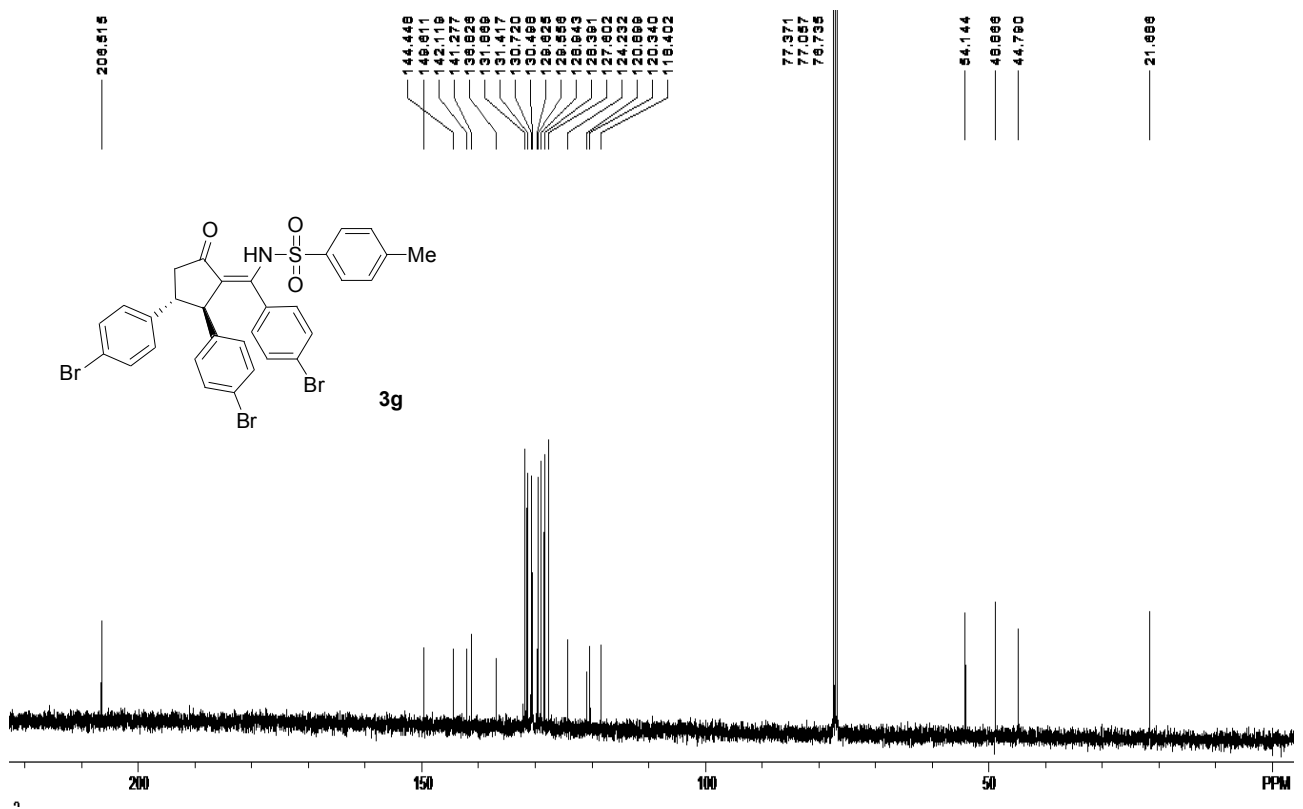



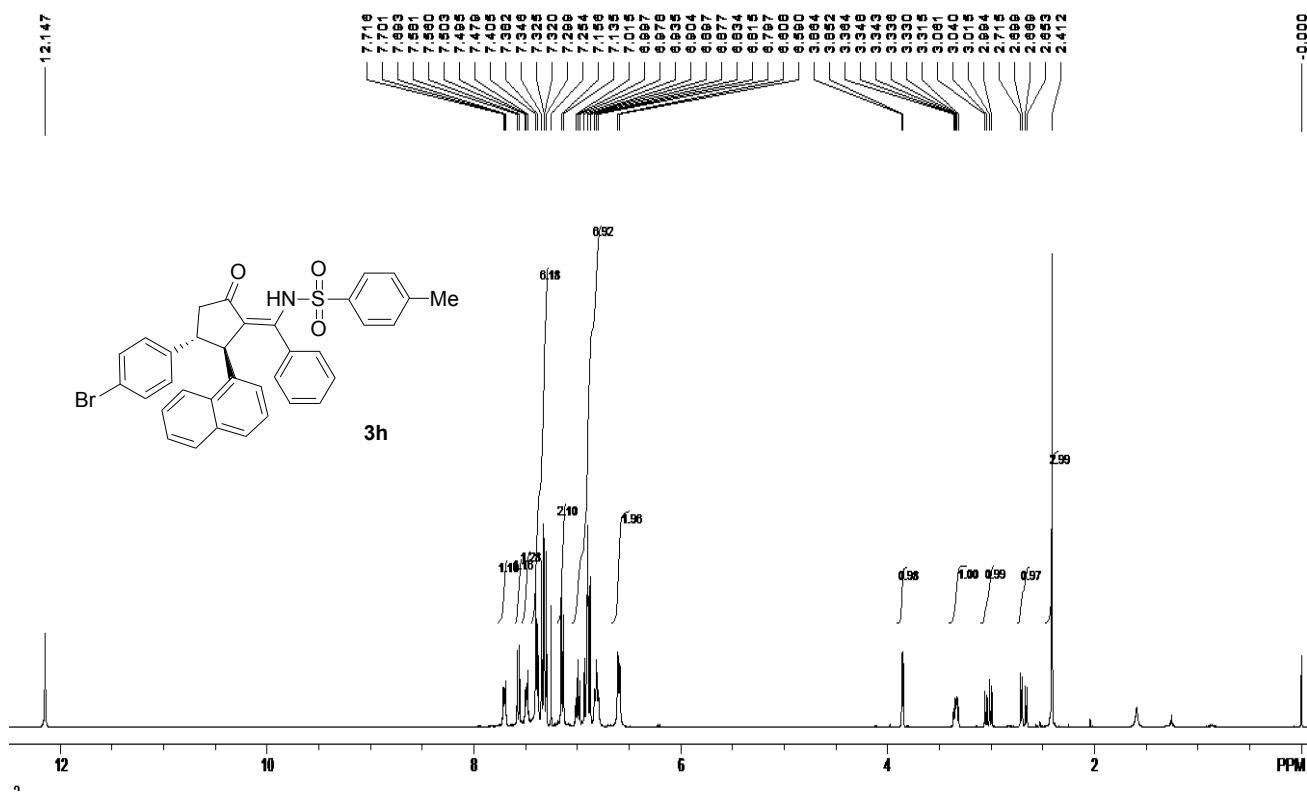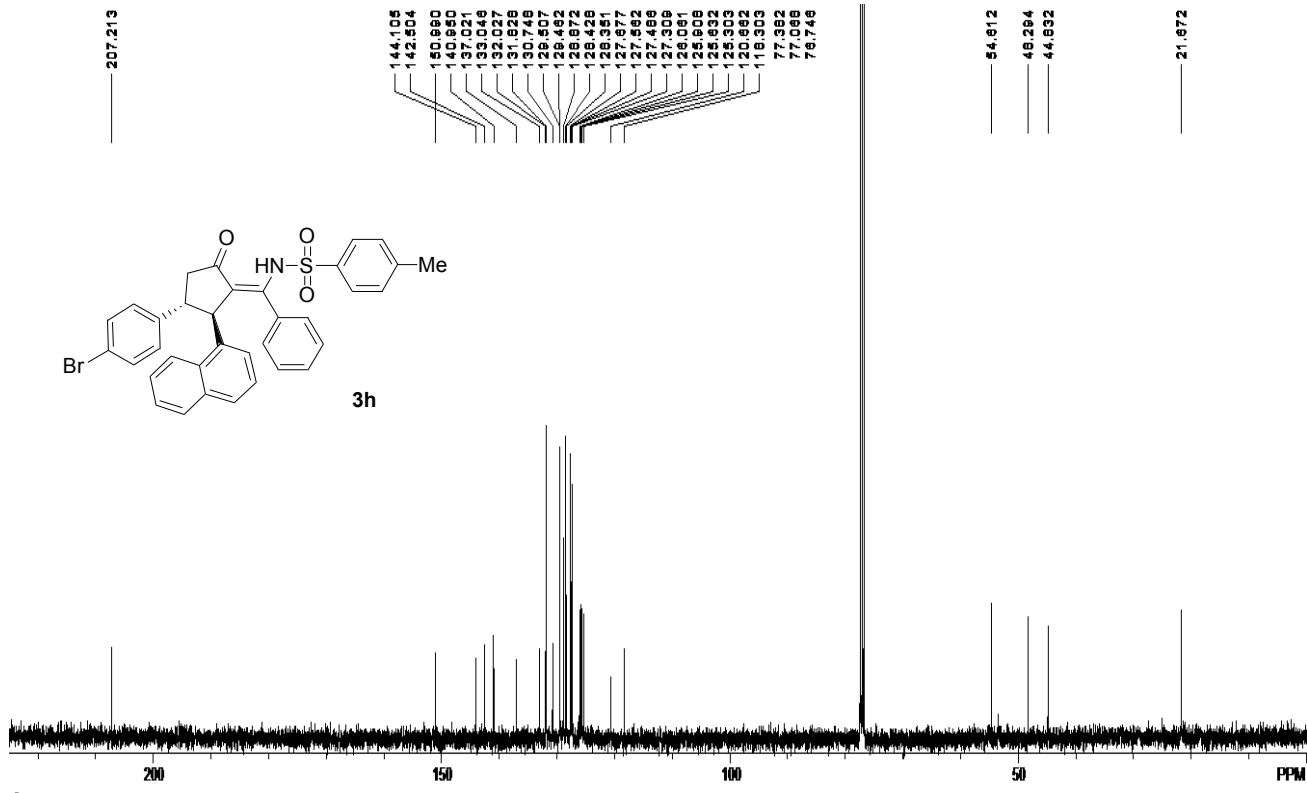

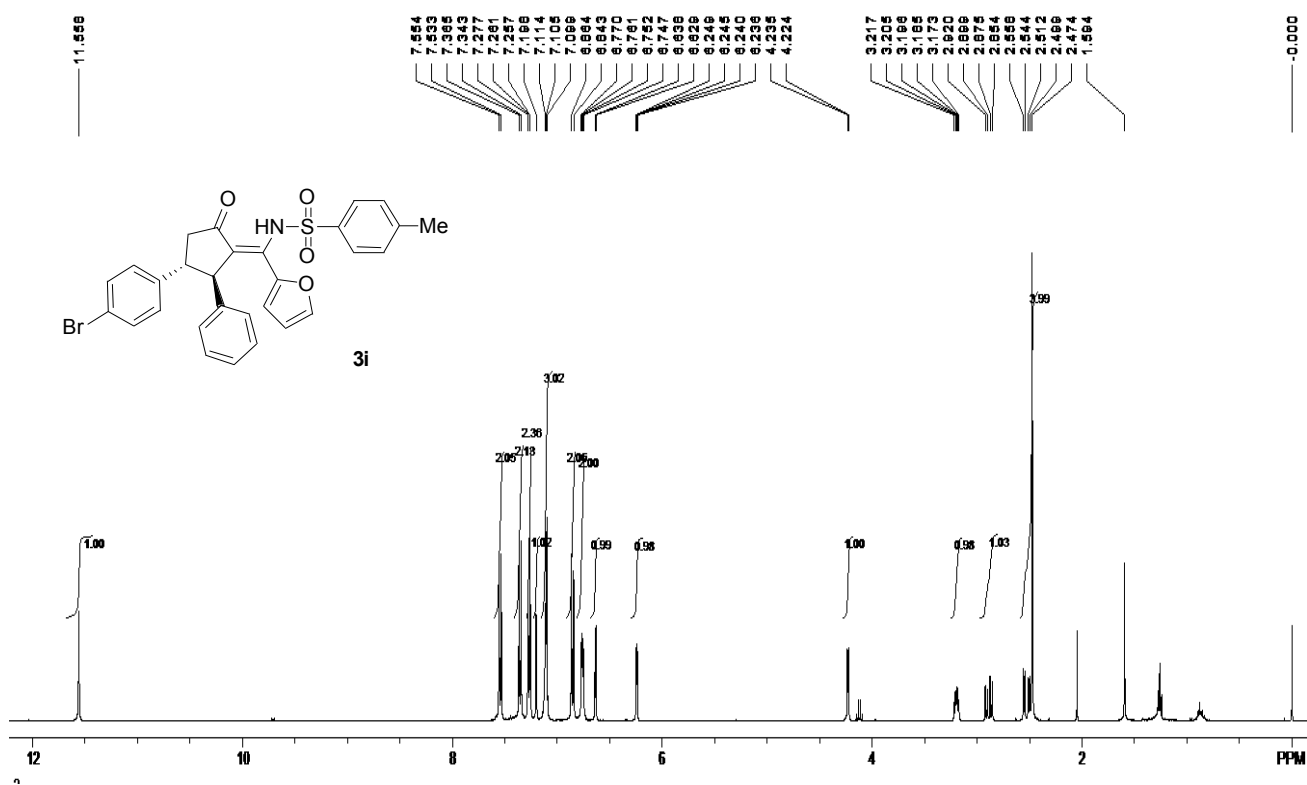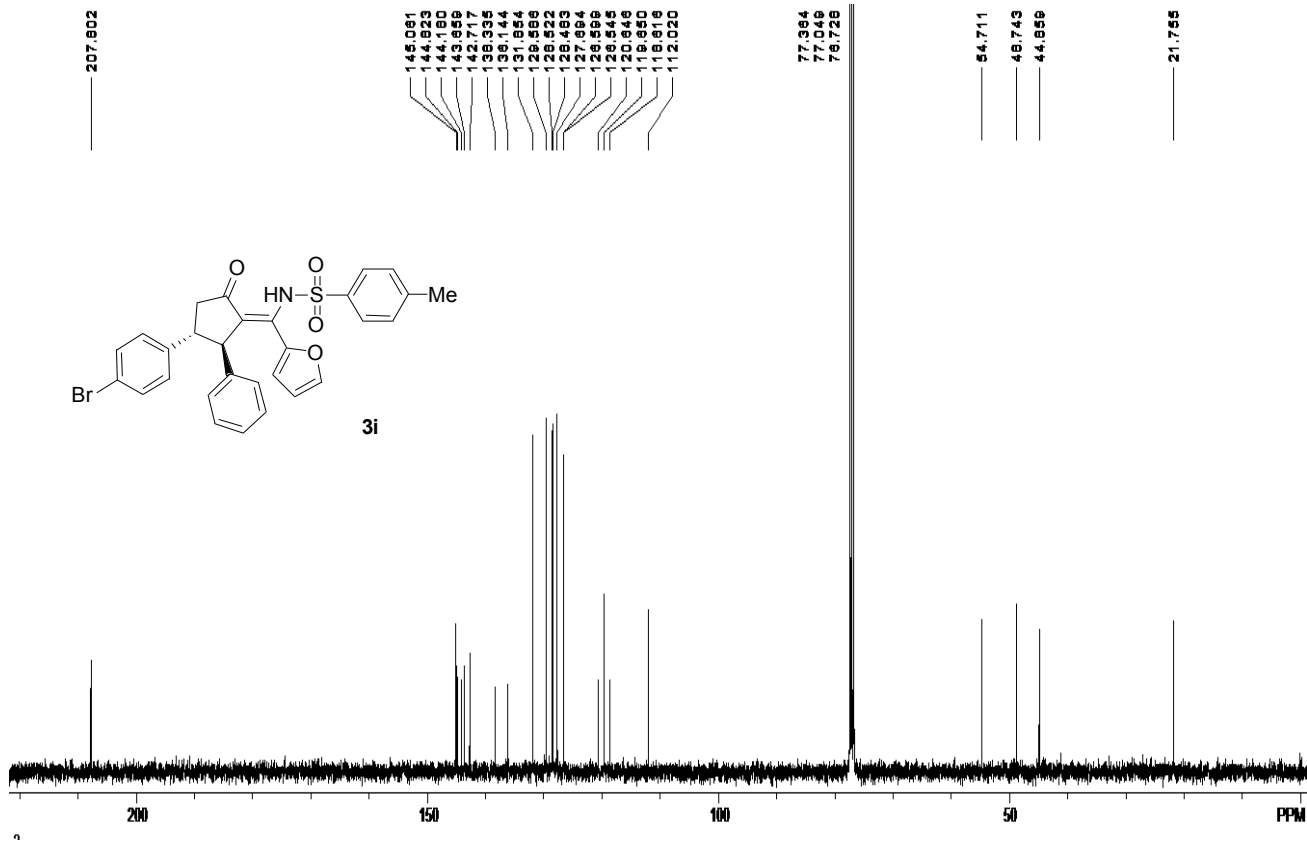

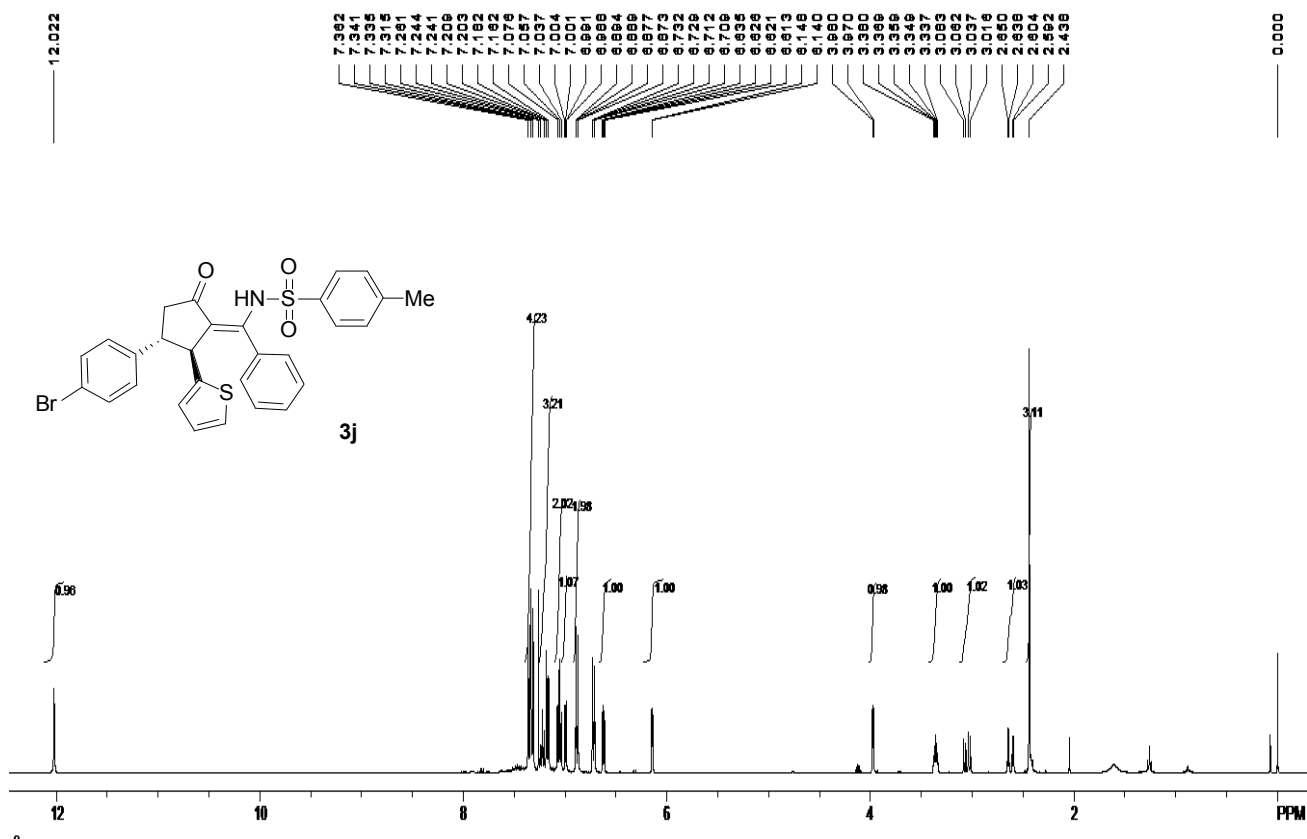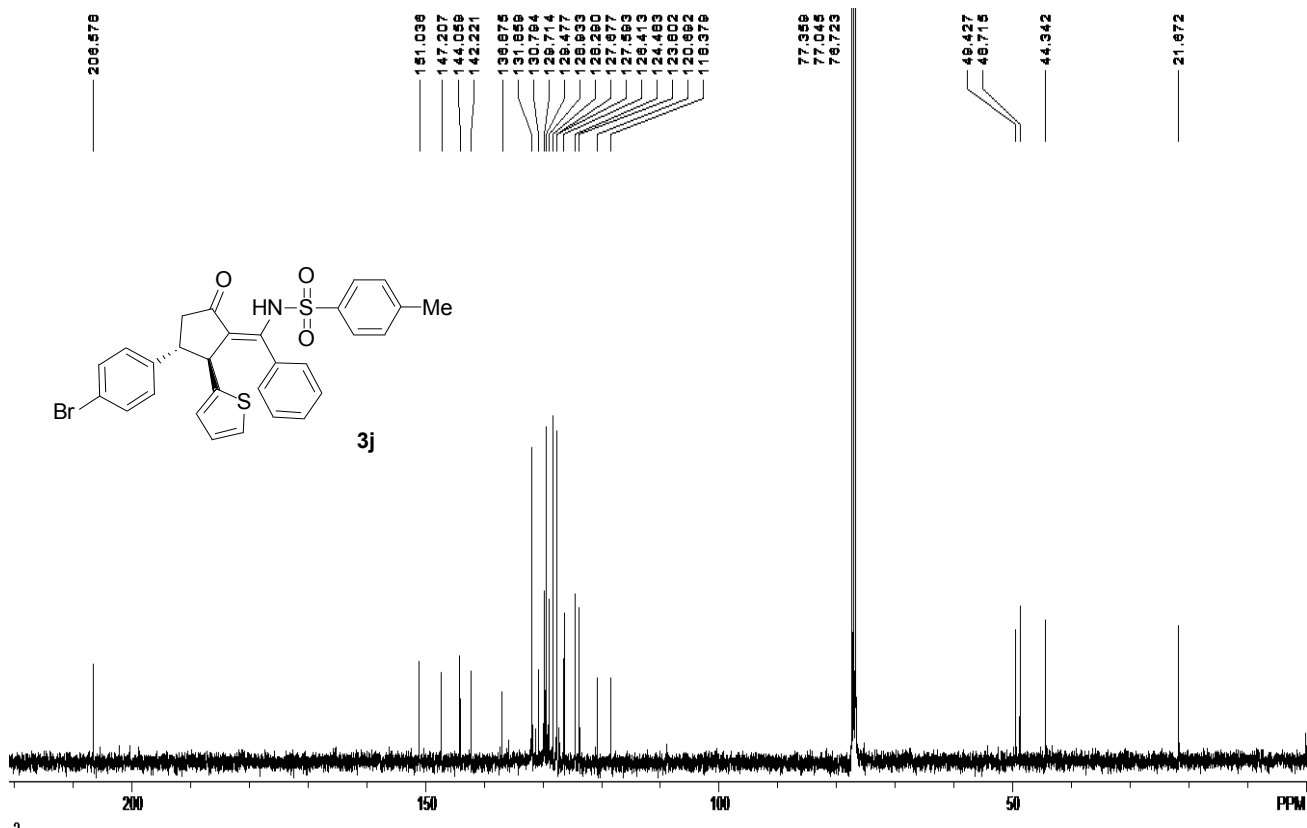

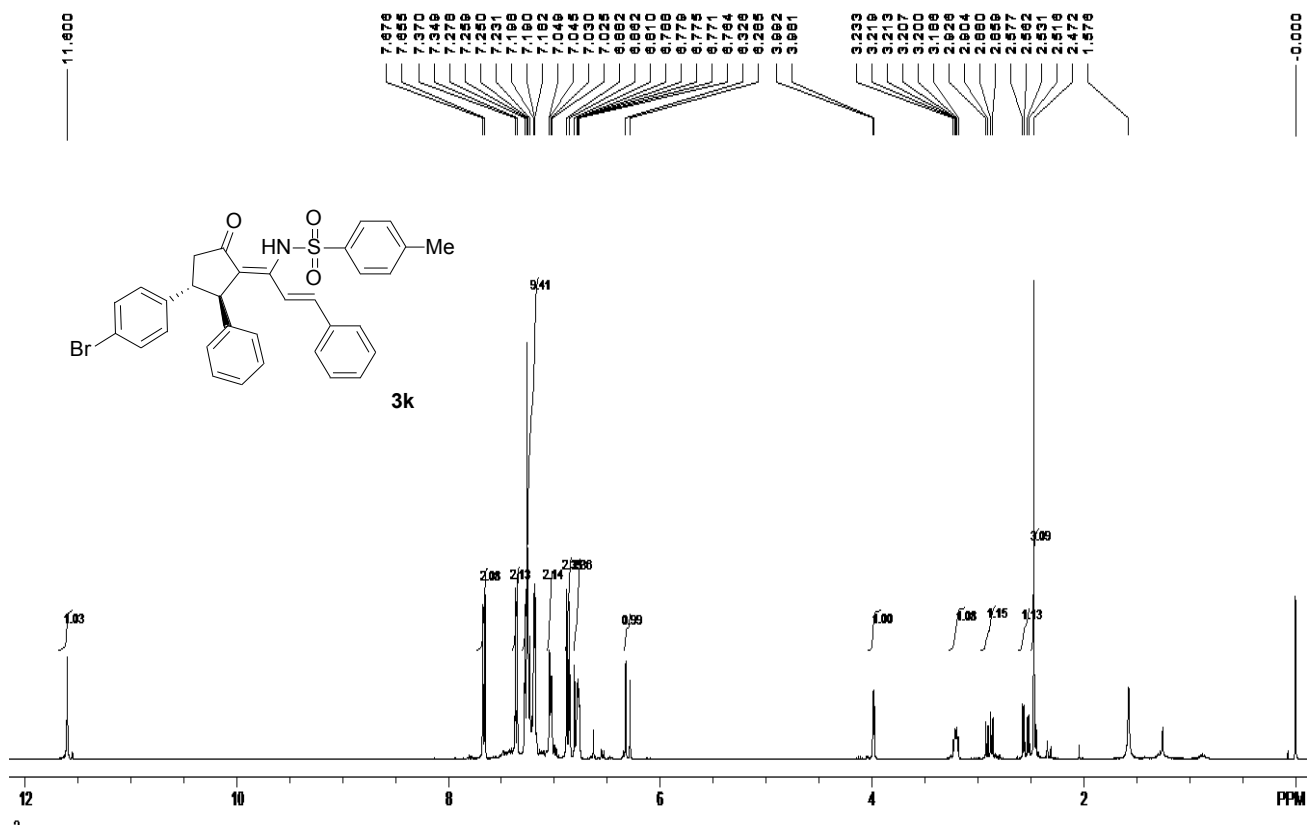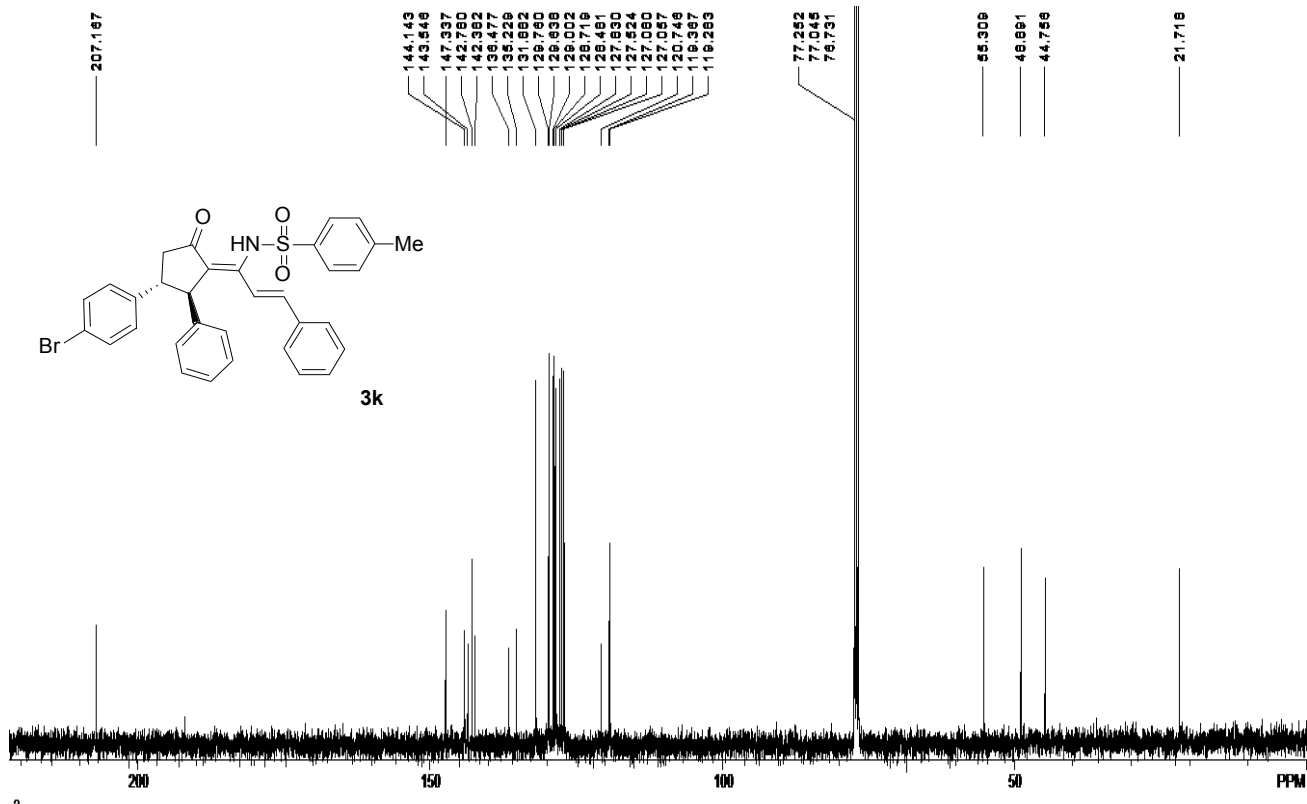

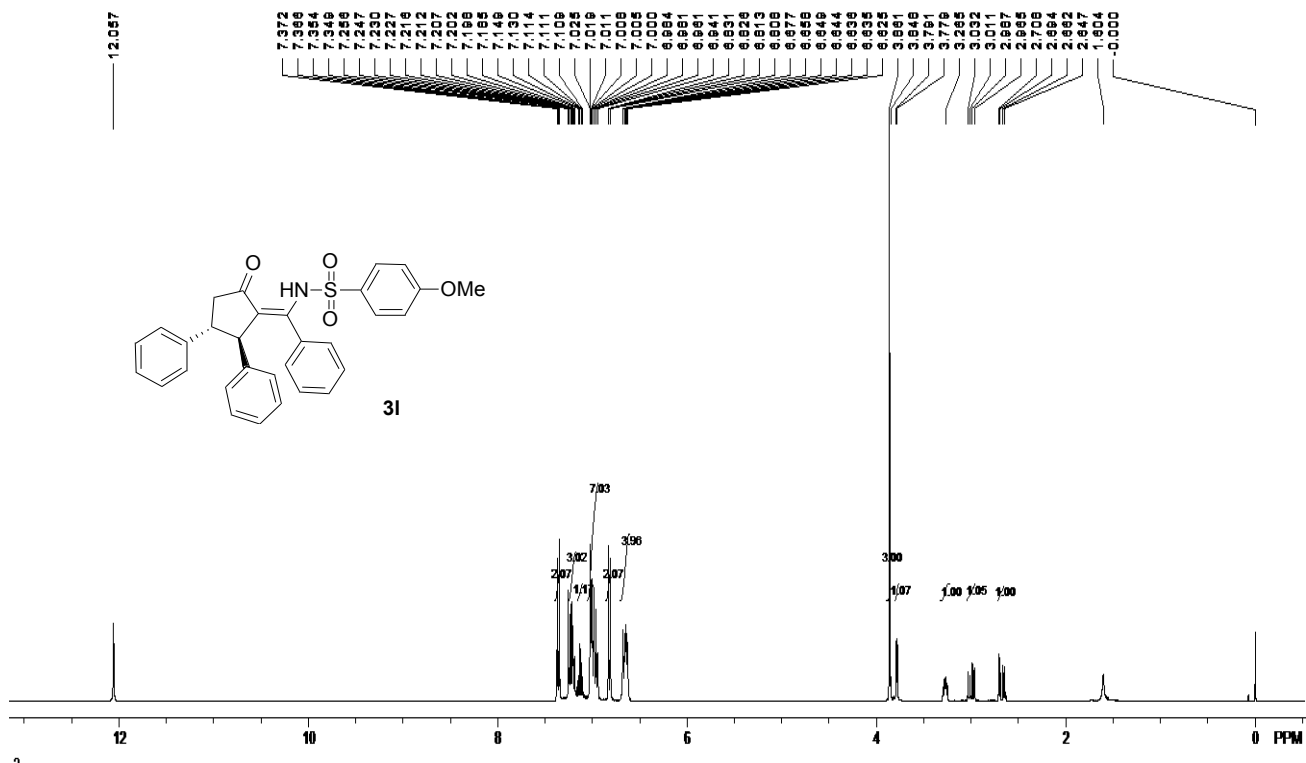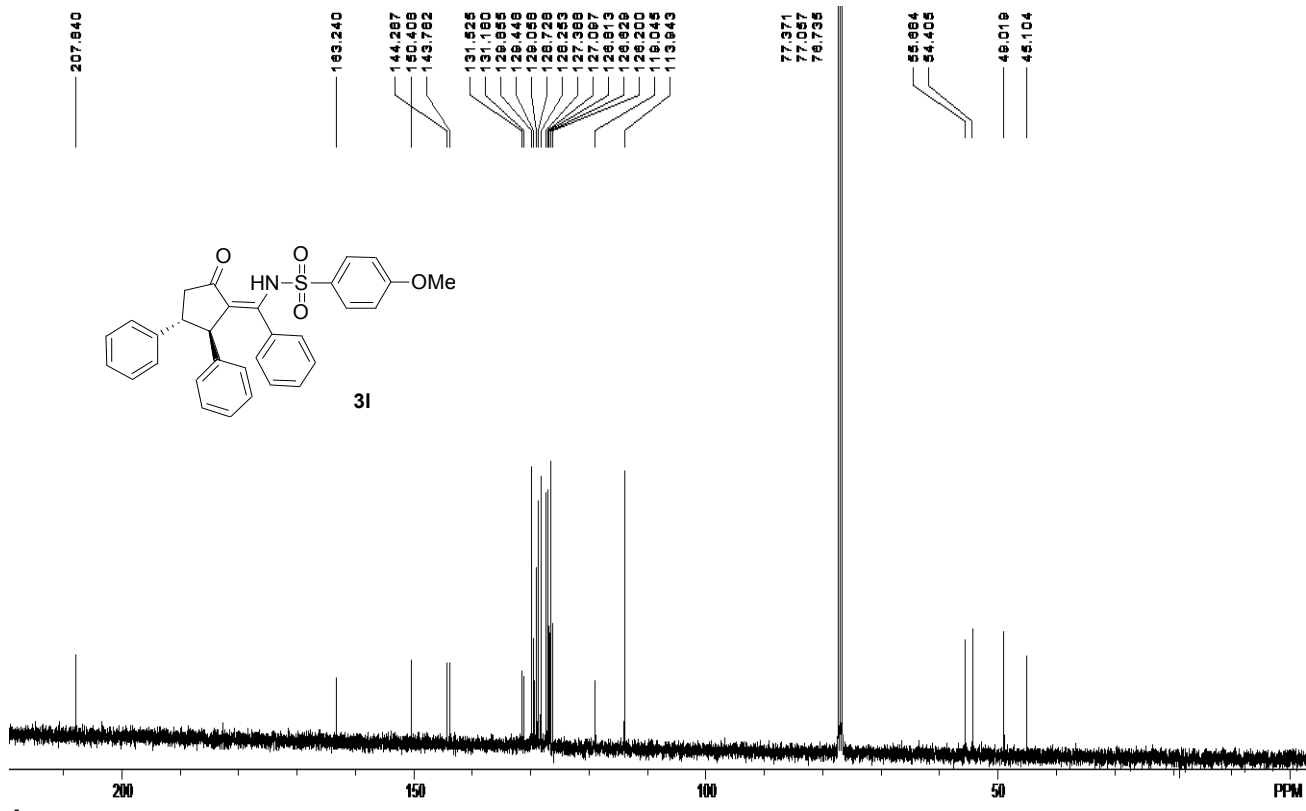



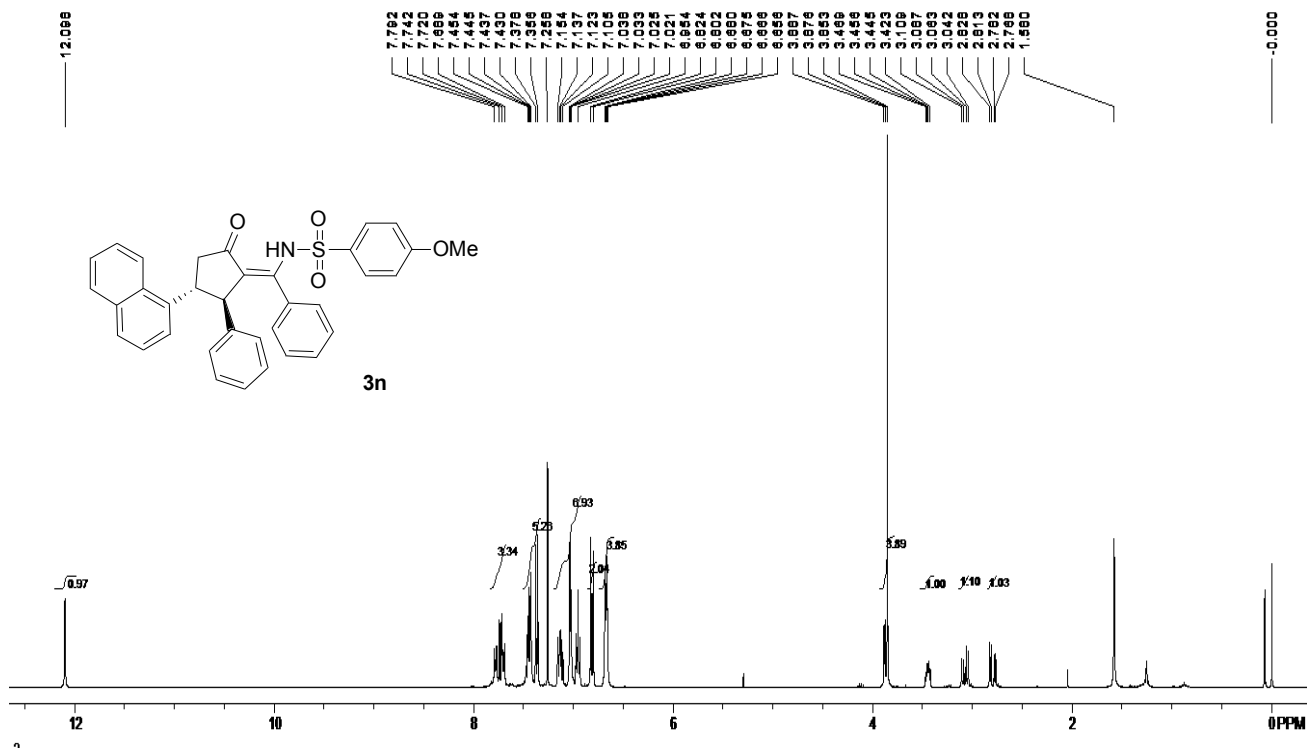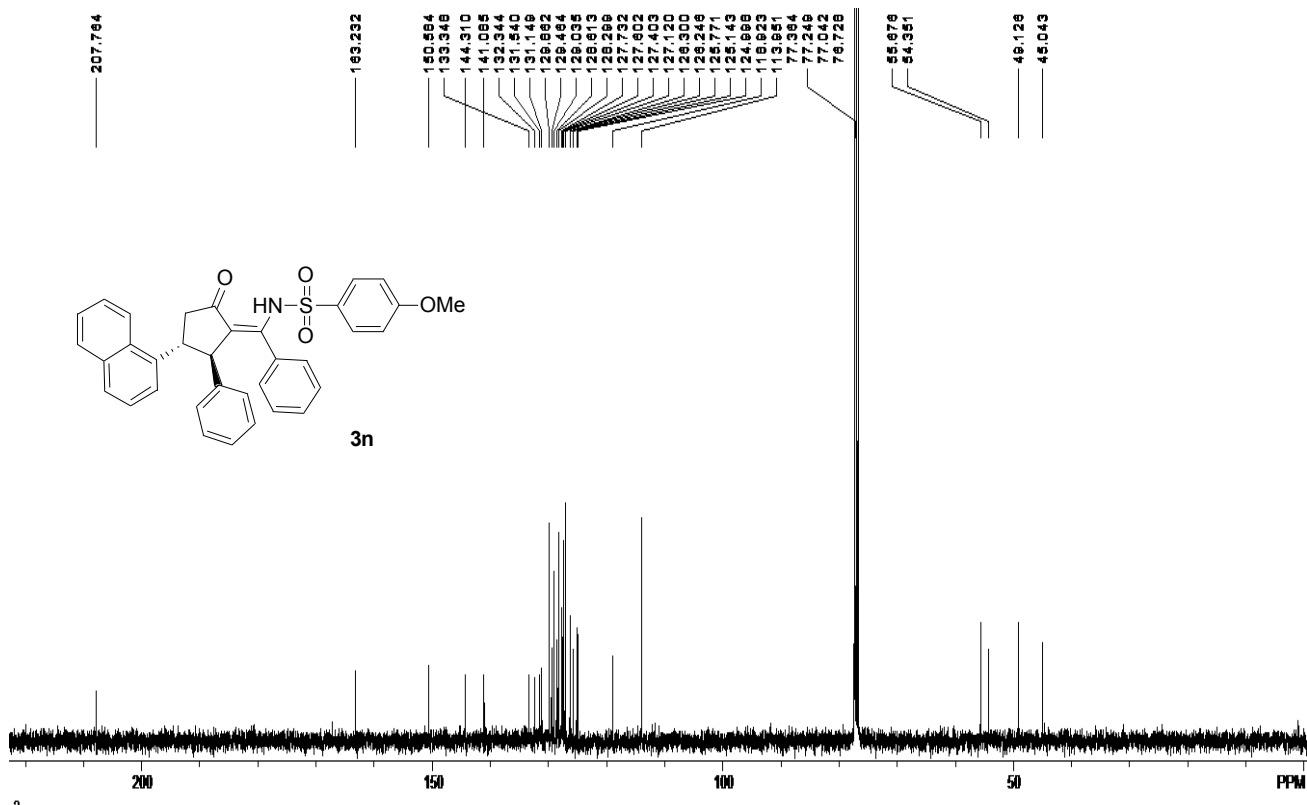

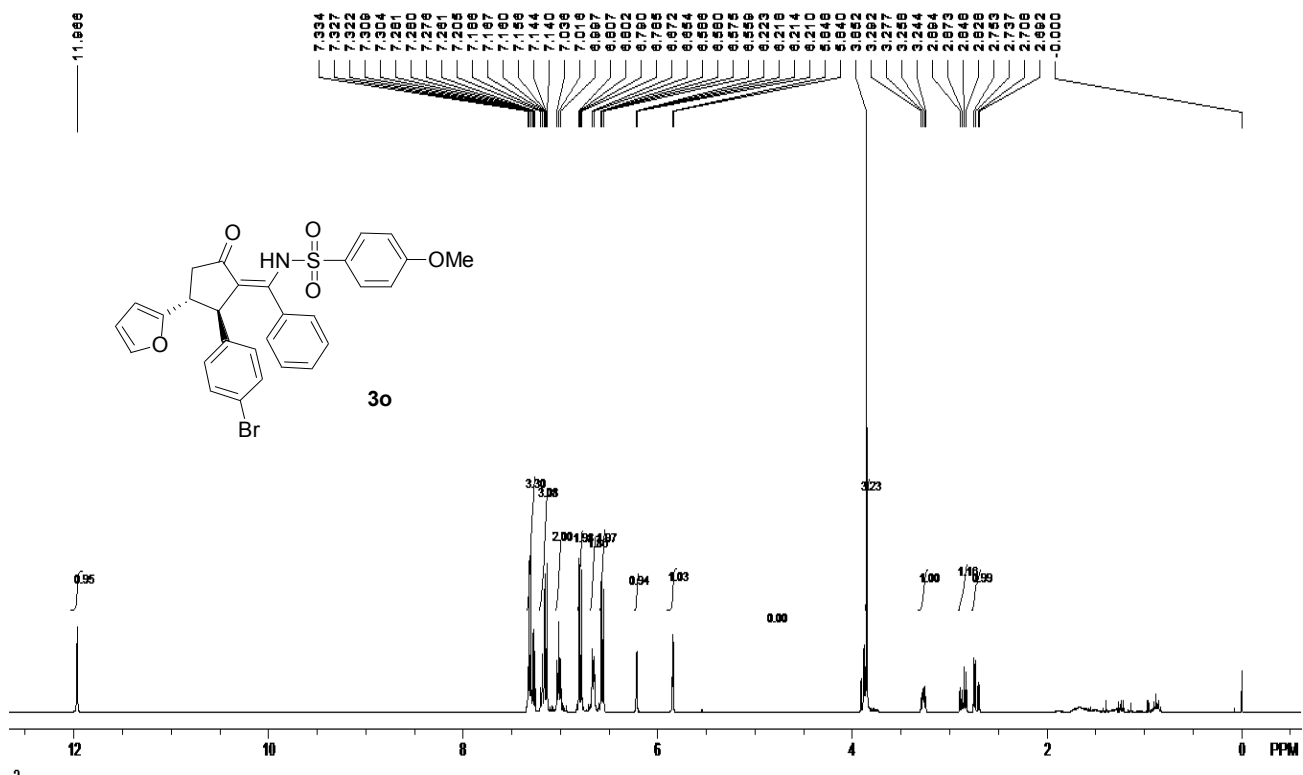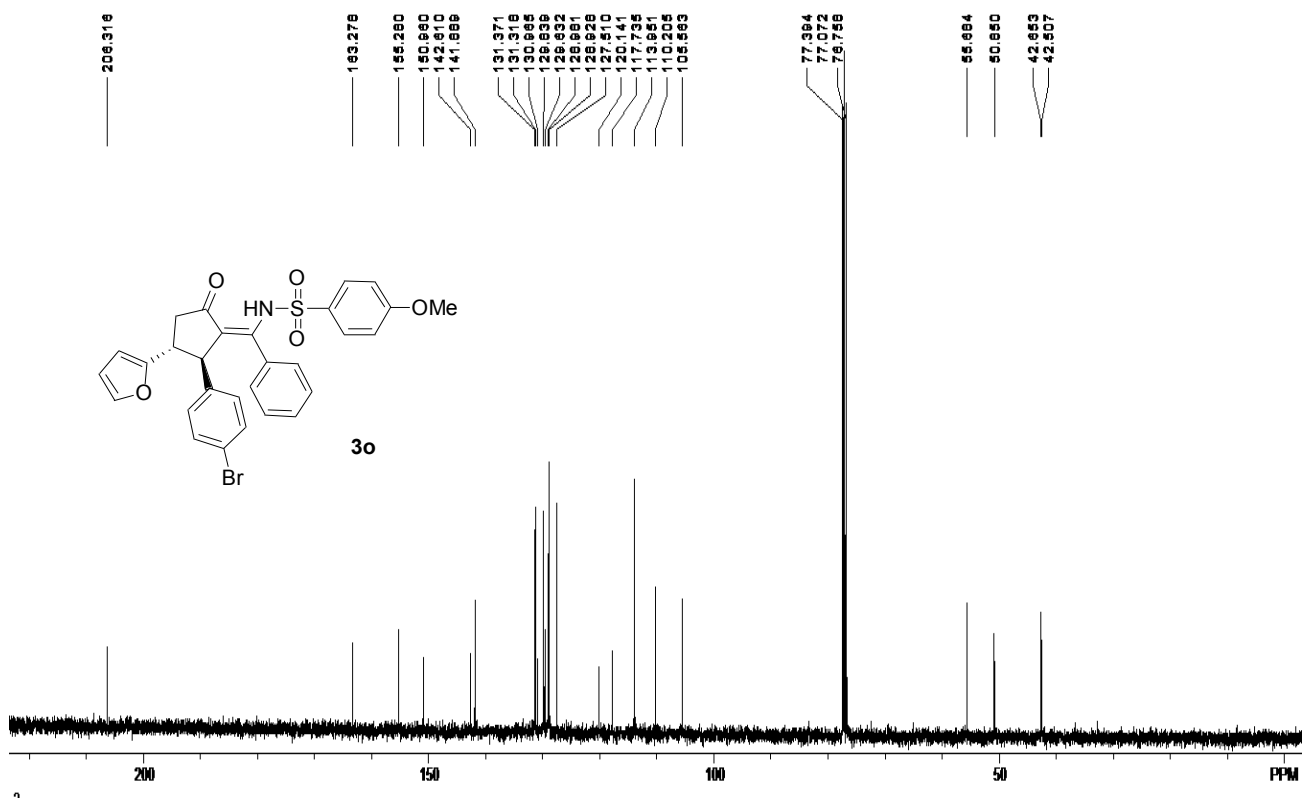



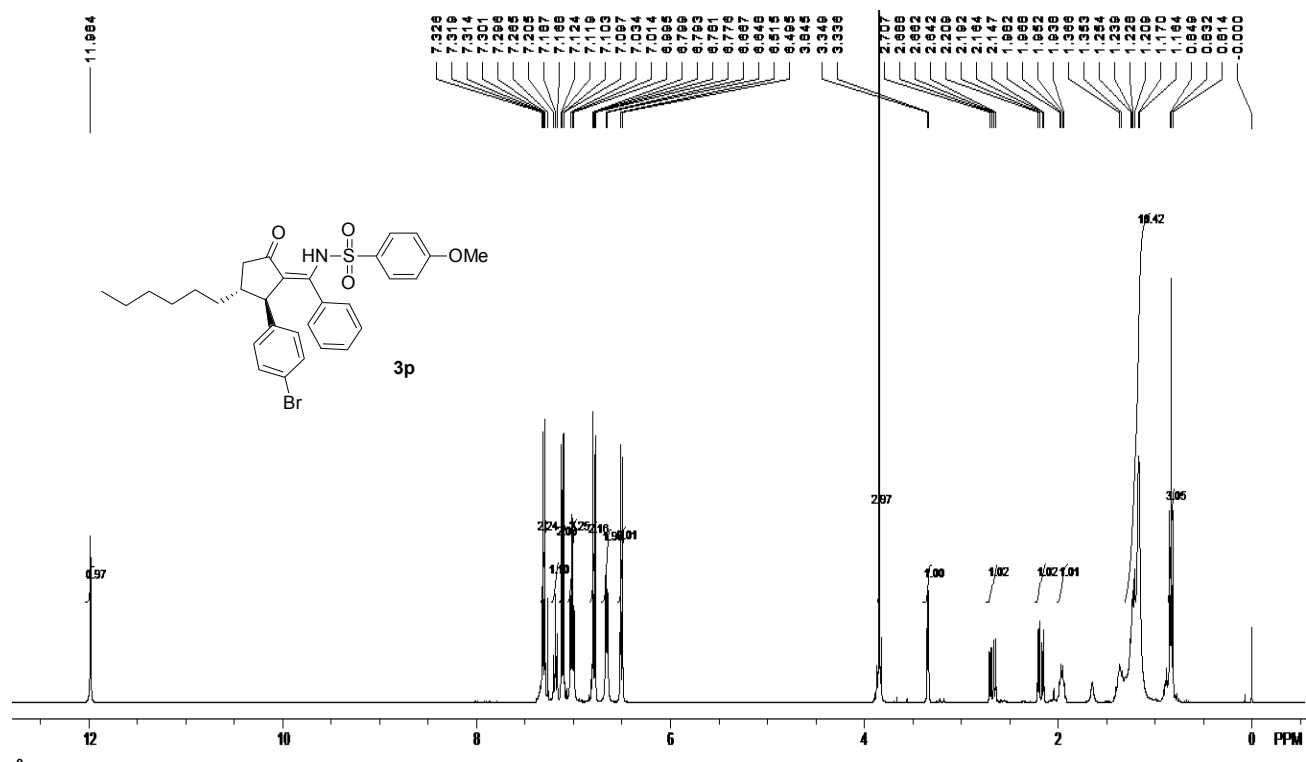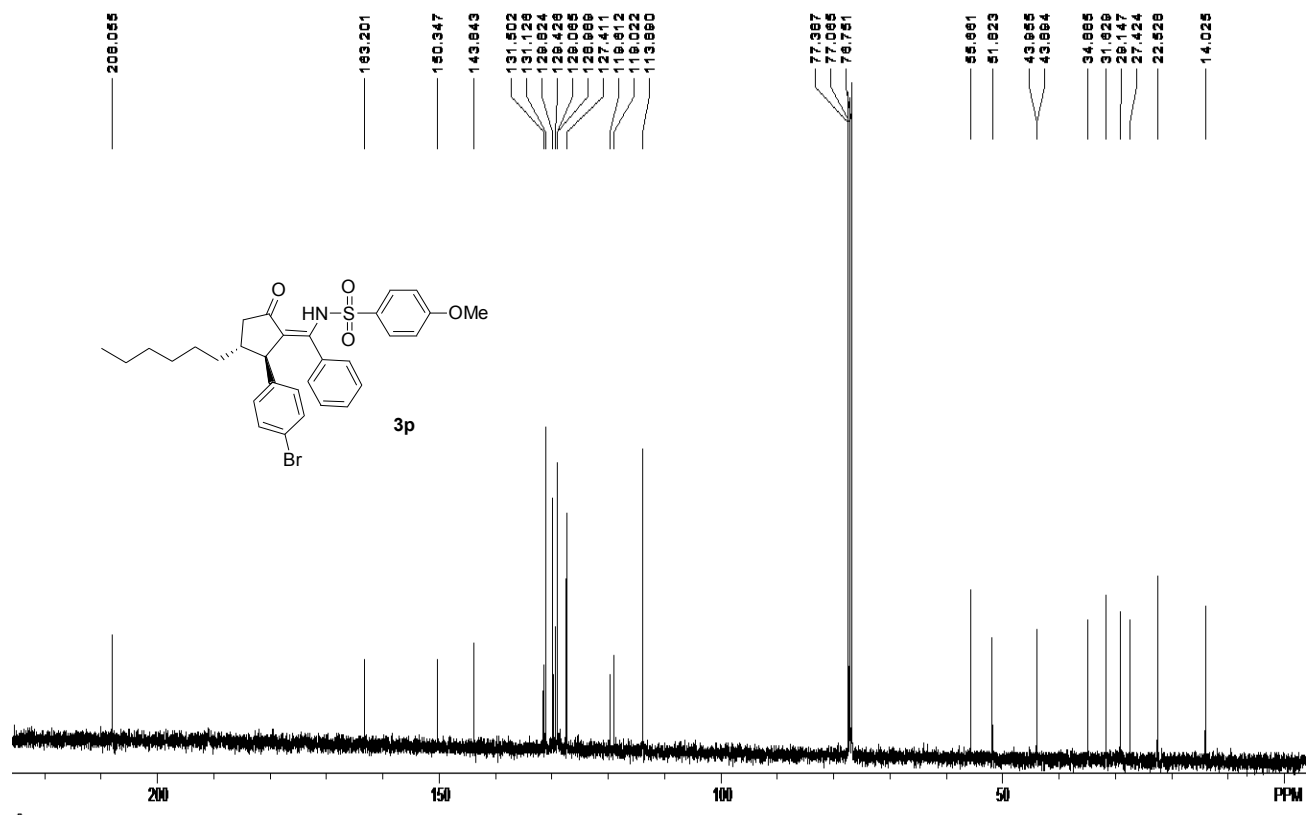

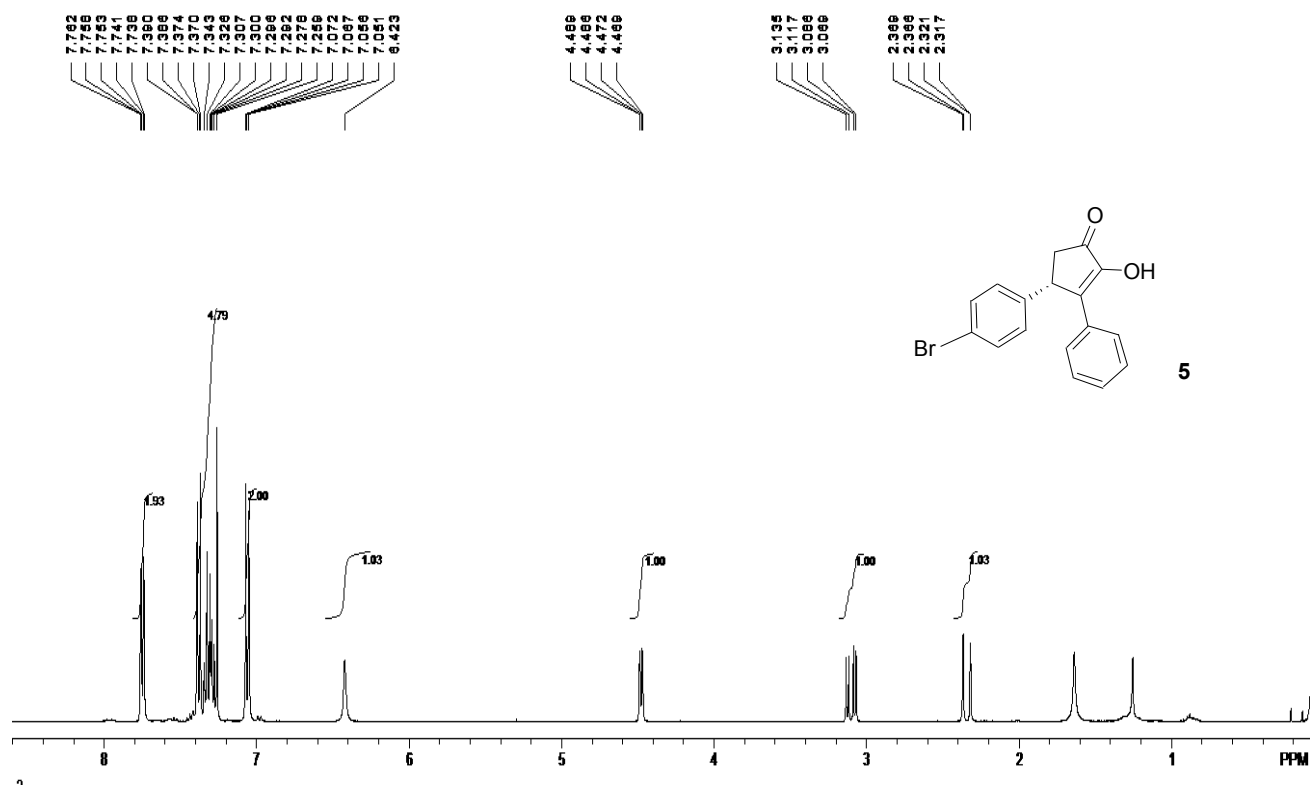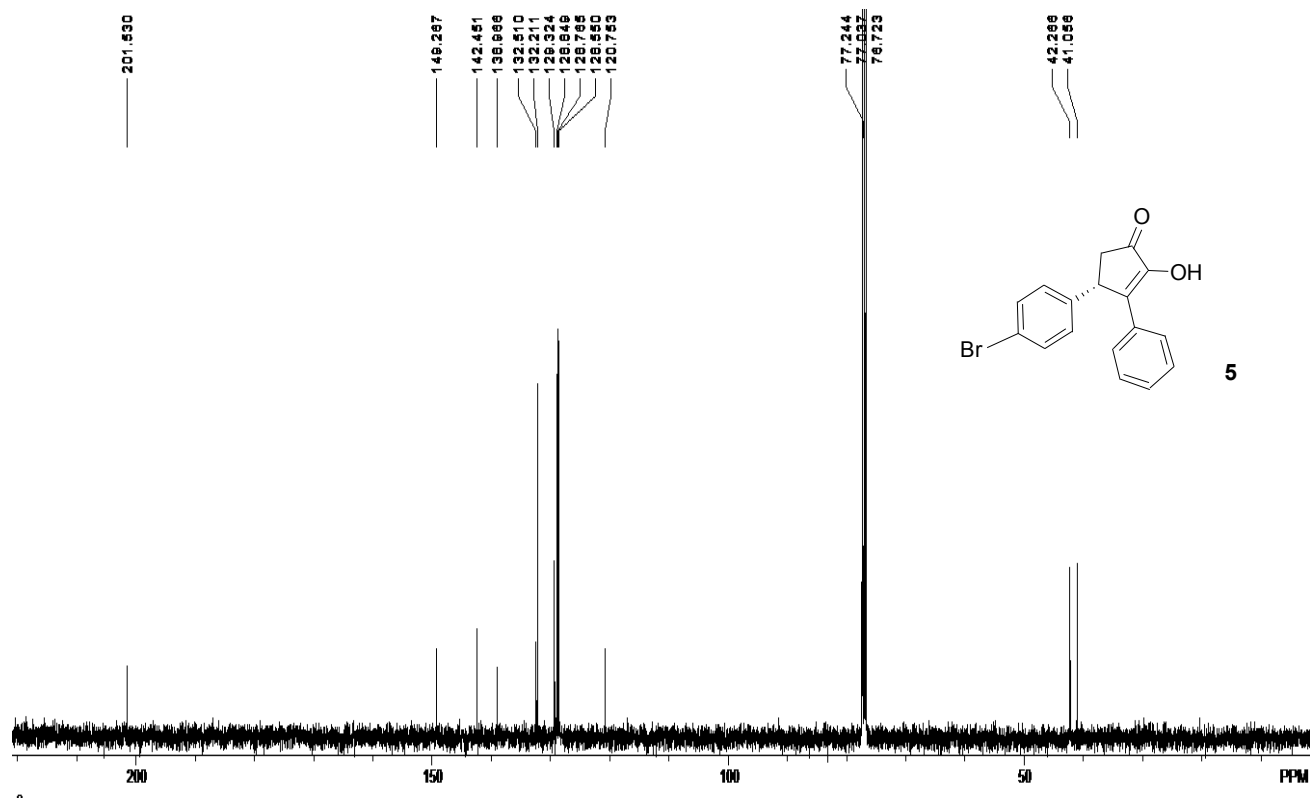

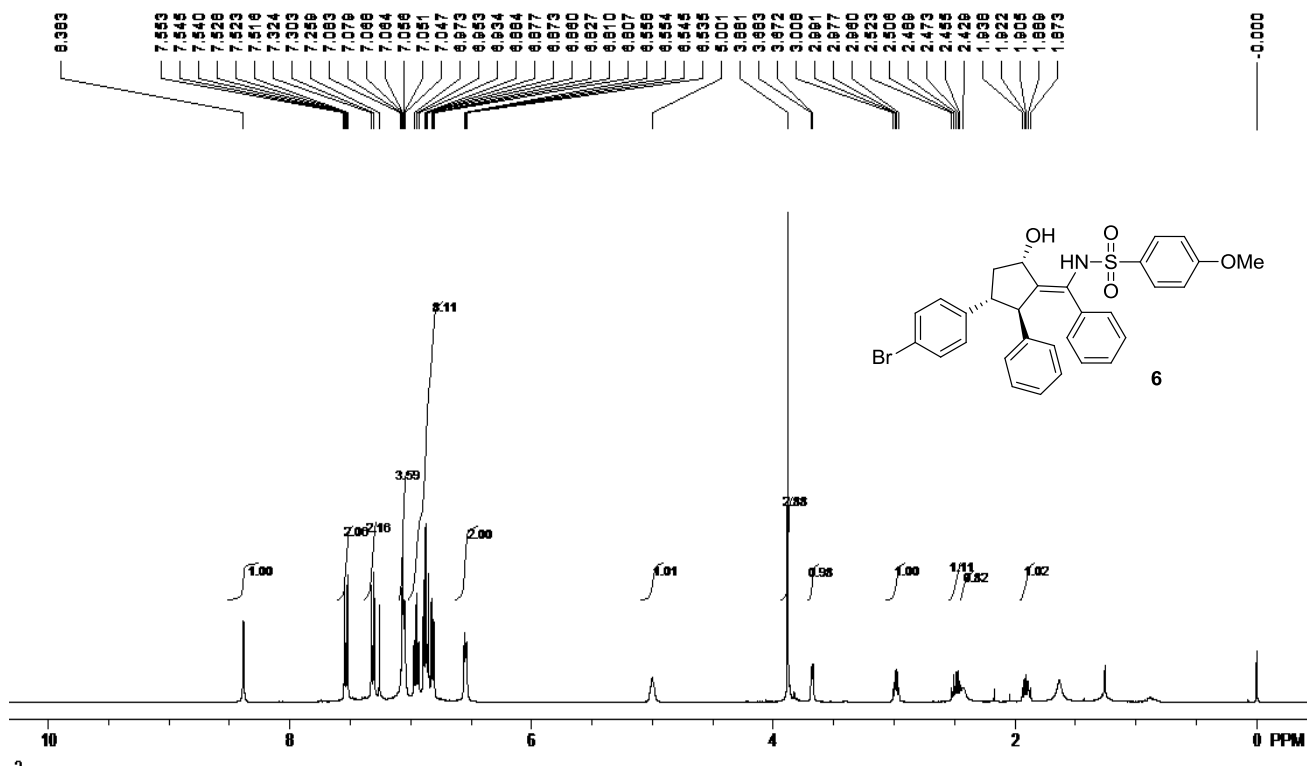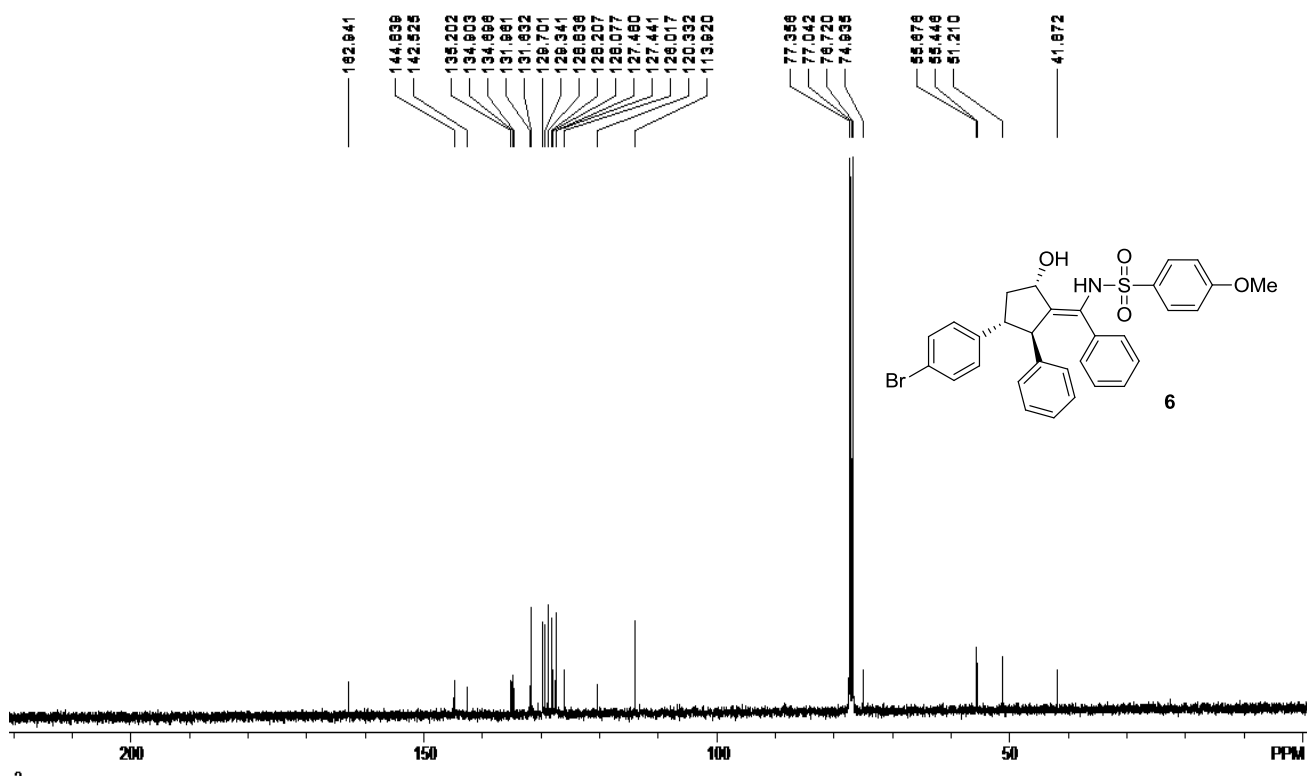

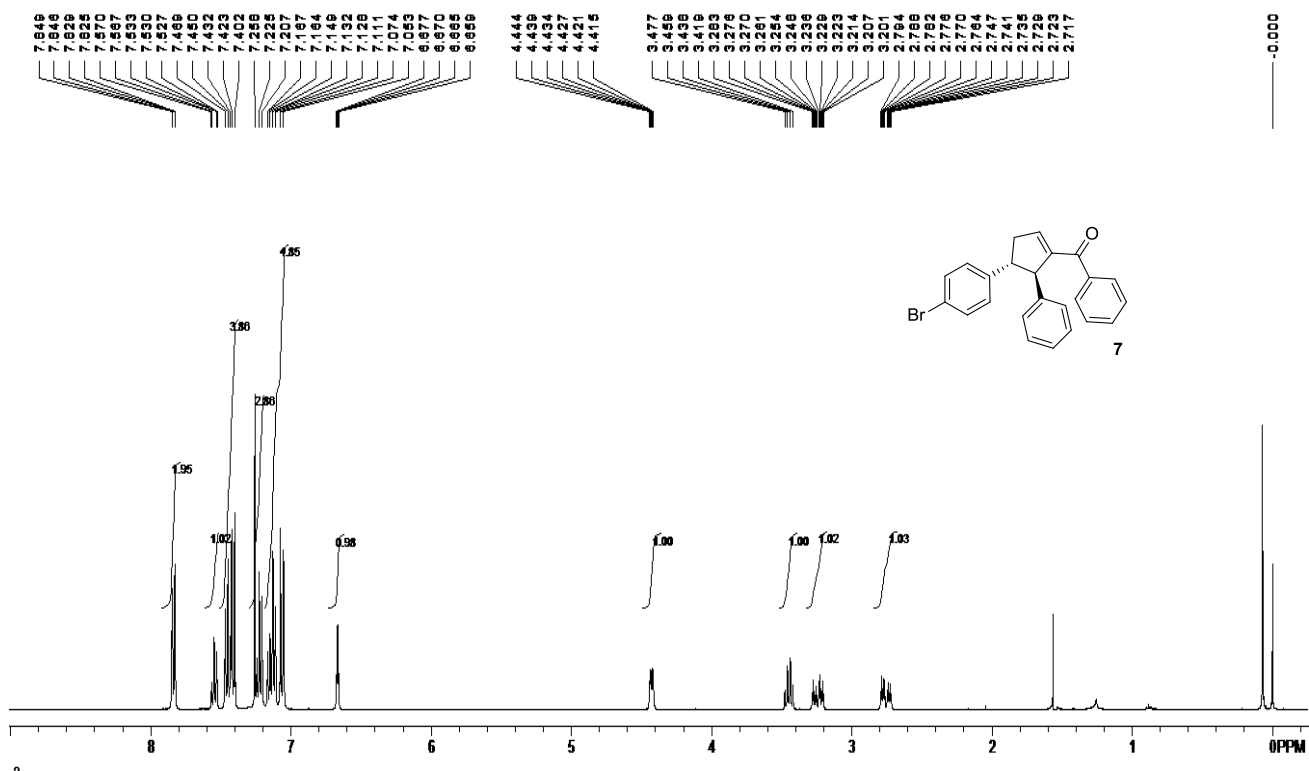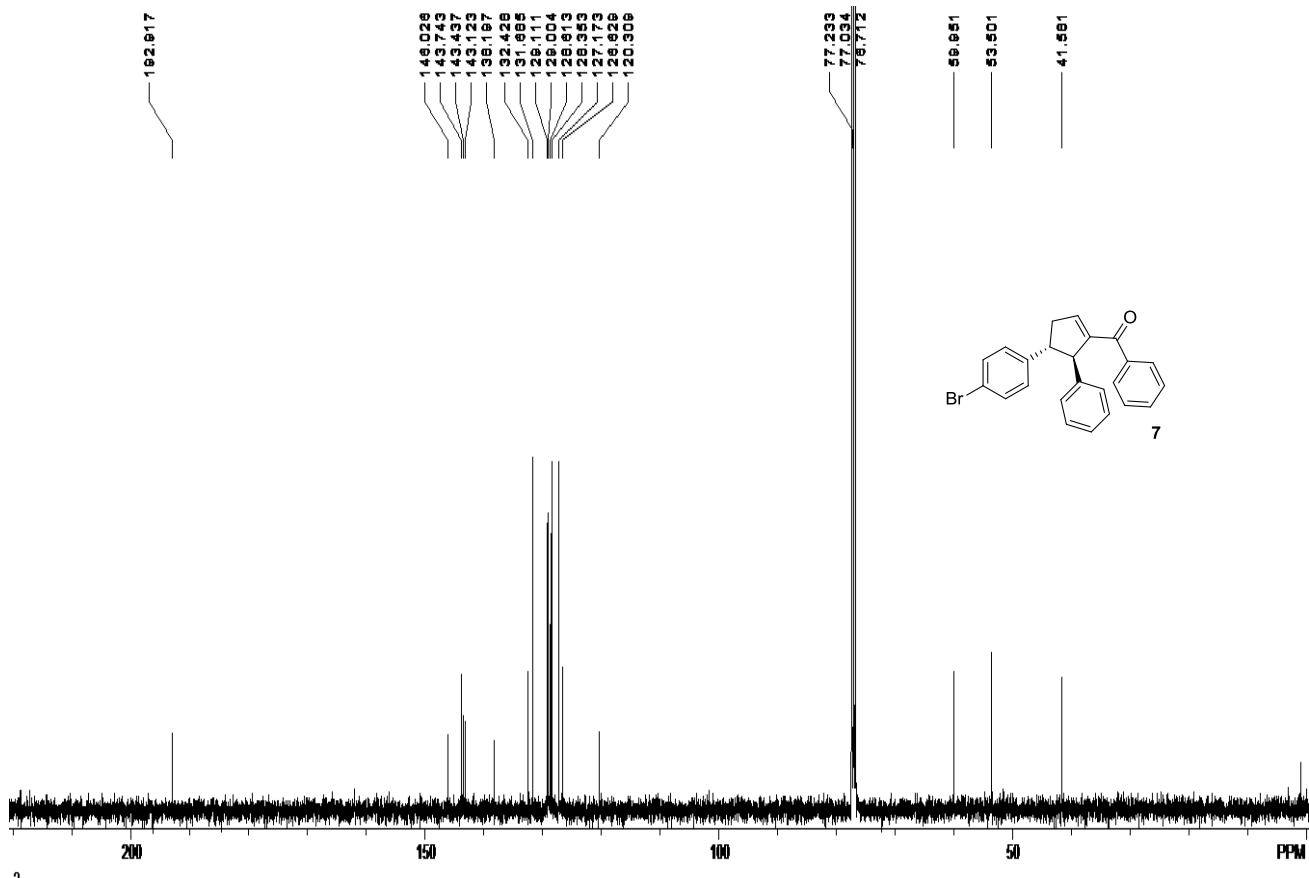

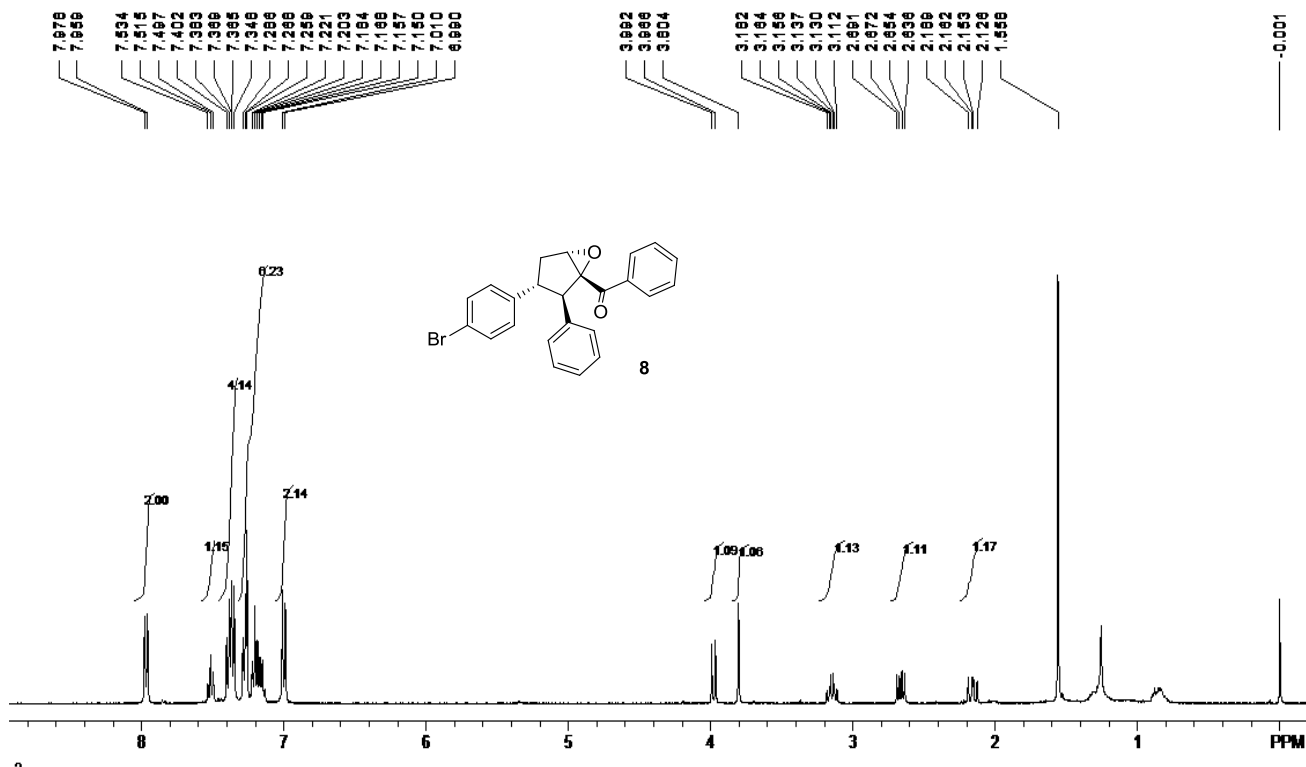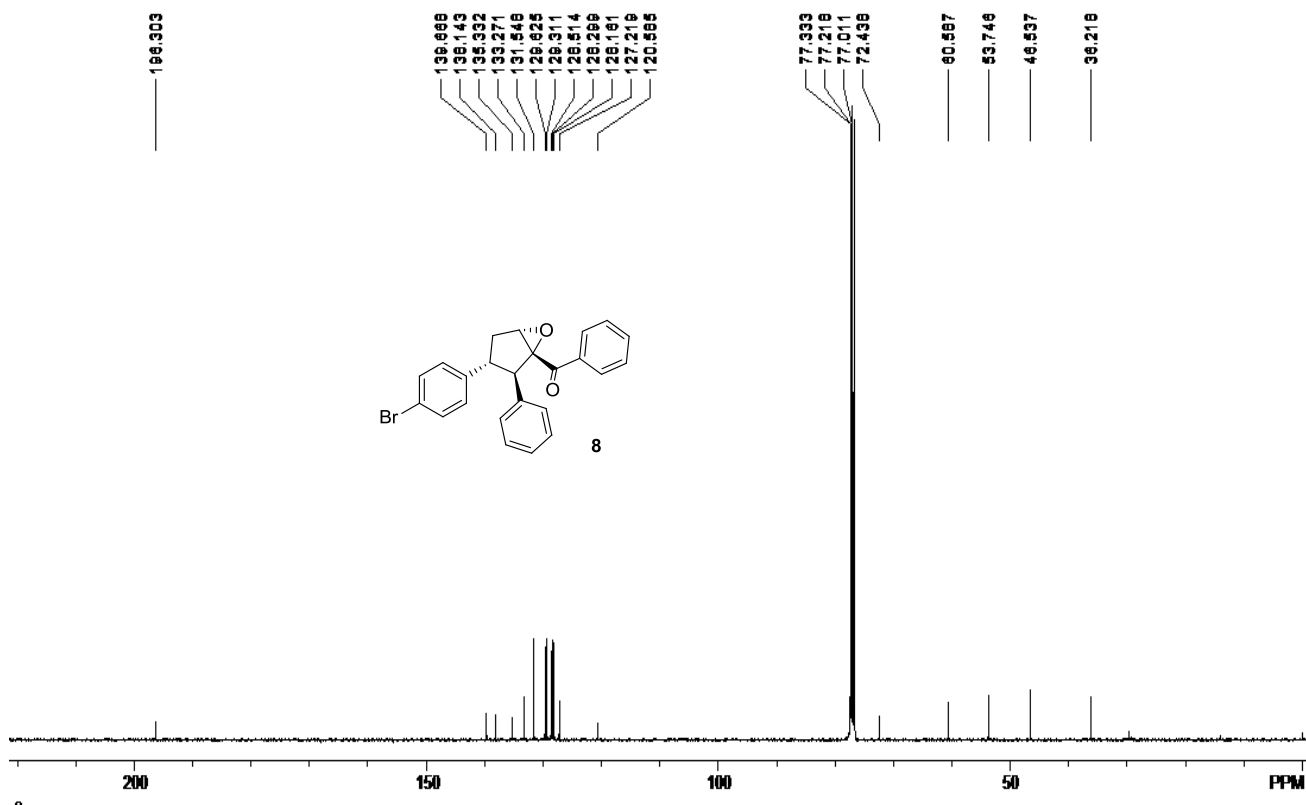

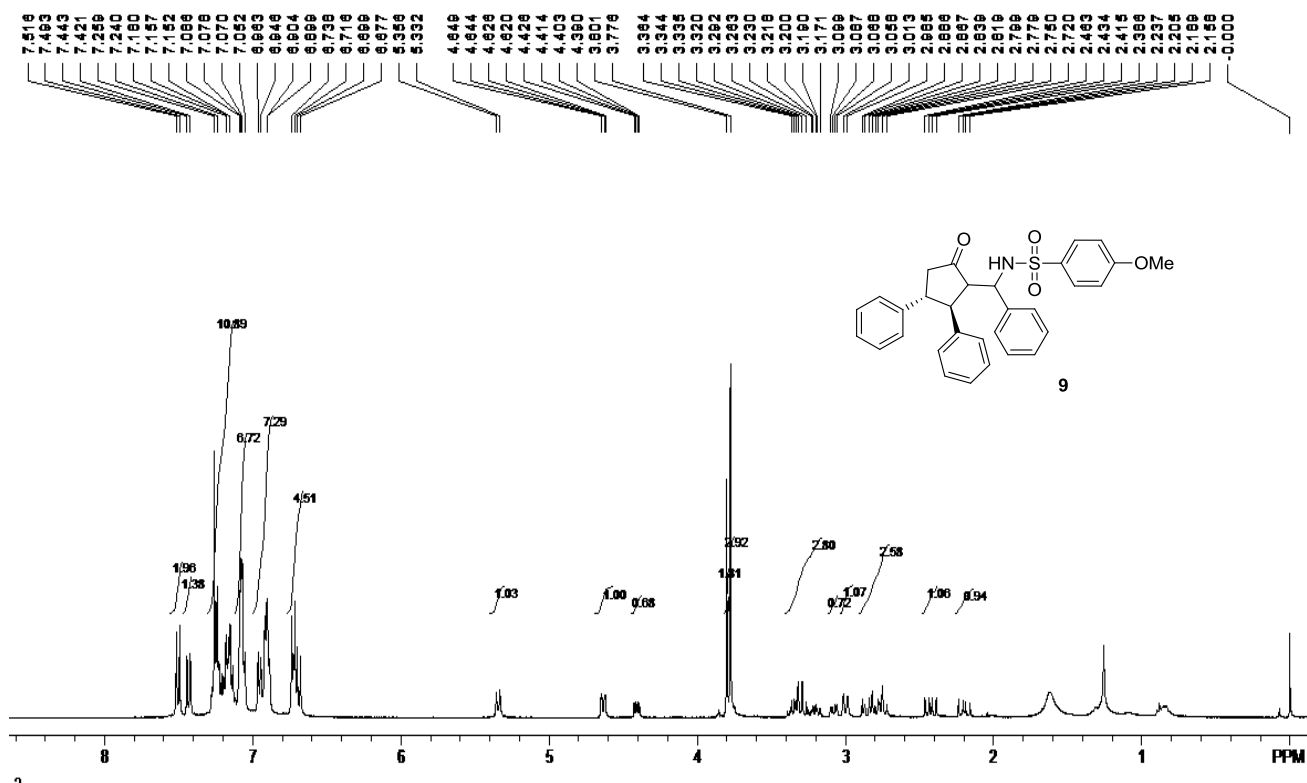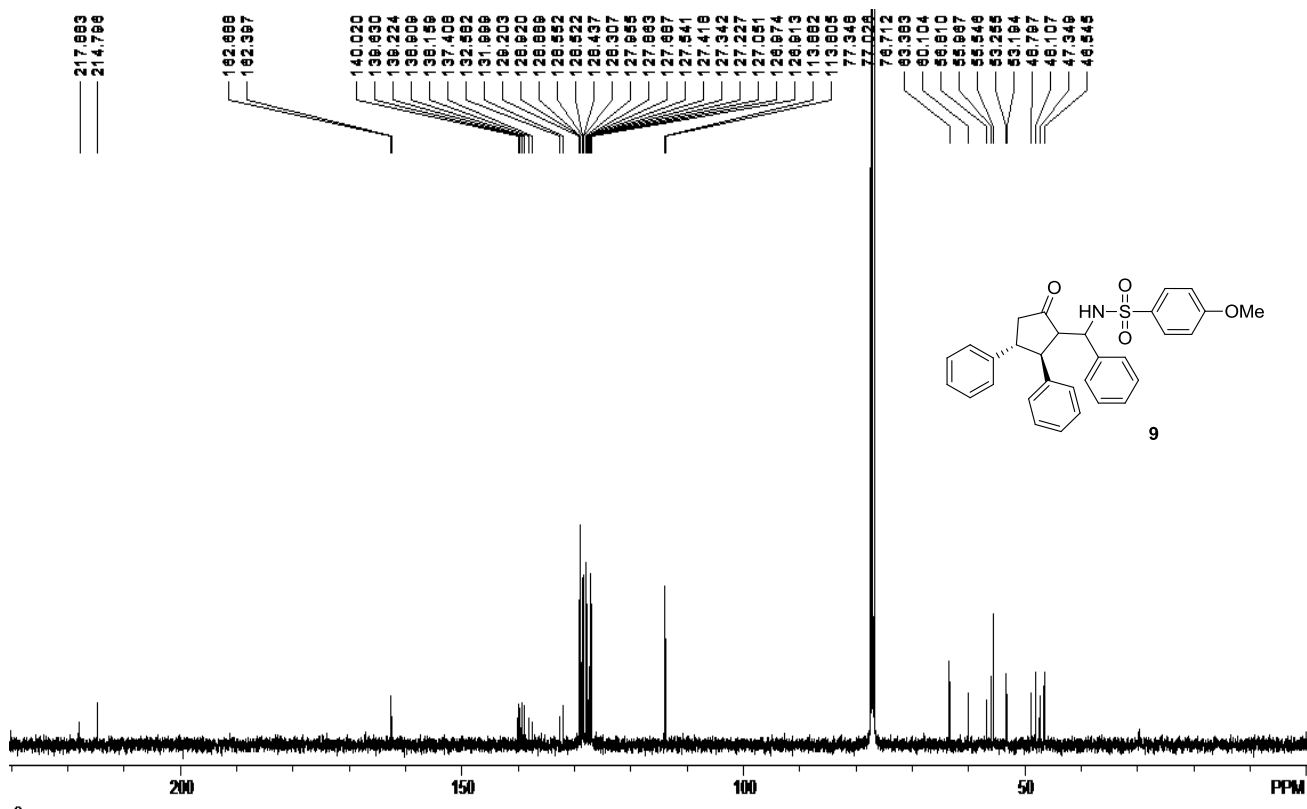

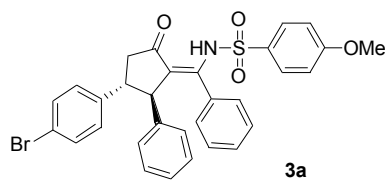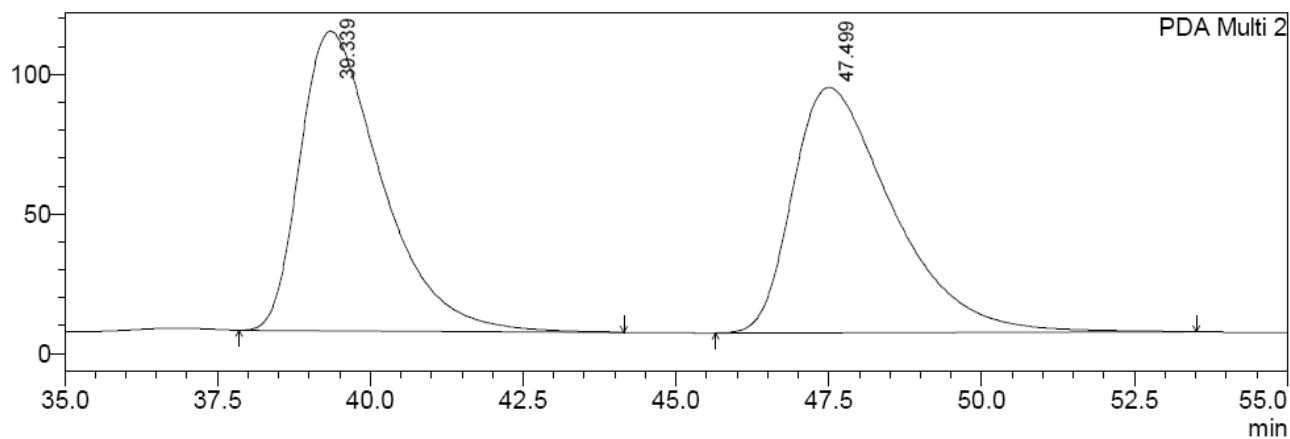

PDA Ch2 220nm 4mm

| Peak# | Ret. Time | Area     | Height | Area %  | Height % |
|-------|-----------|----------|--------|---------|----------|
| 1     | 39.339    | 9957784  | 107091 | 49.902  | 54.972   |
| 2     | 47.499    | 9996917  | 87721  | 50.098  | 45.028   |
| Total |           | 19954701 | 194812 | 100.000 | 100.000  |

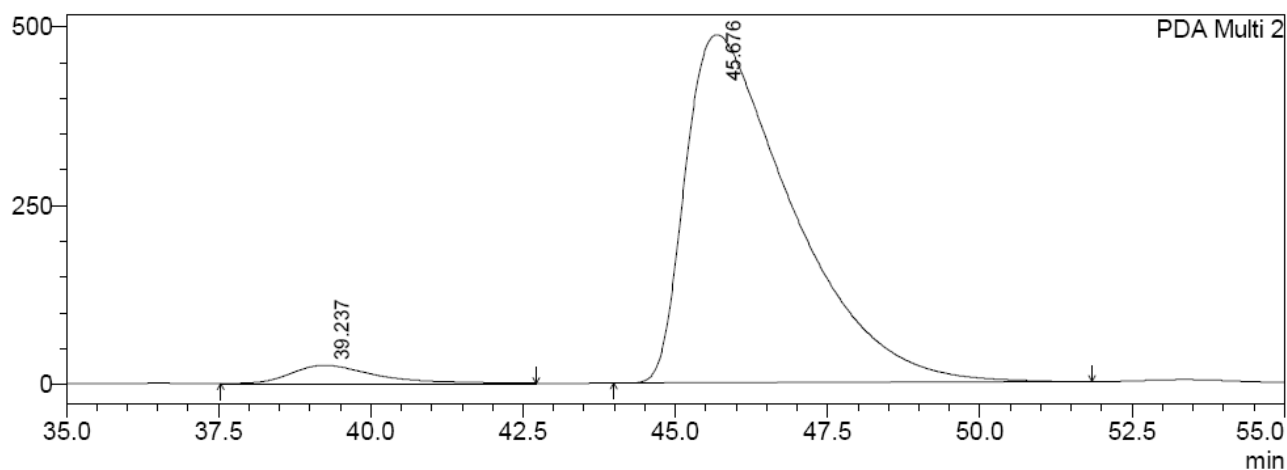

PDA Ch2 220nm 4mm

| Peak# | Ret. Time | Area     | Height | Area %  | Height % |
|-------|-----------|----------|--------|---------|----------|
| 1     | 39.237    | 2392067  | 25140  | 3.882   | 4.912    |
| 2     | 45.676    | 59233055 | 486657 | 96.118  | 95.088   |
| Total |           | 61625122 | 511797 | 100.000 | 100.000  |

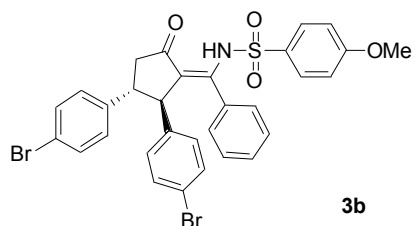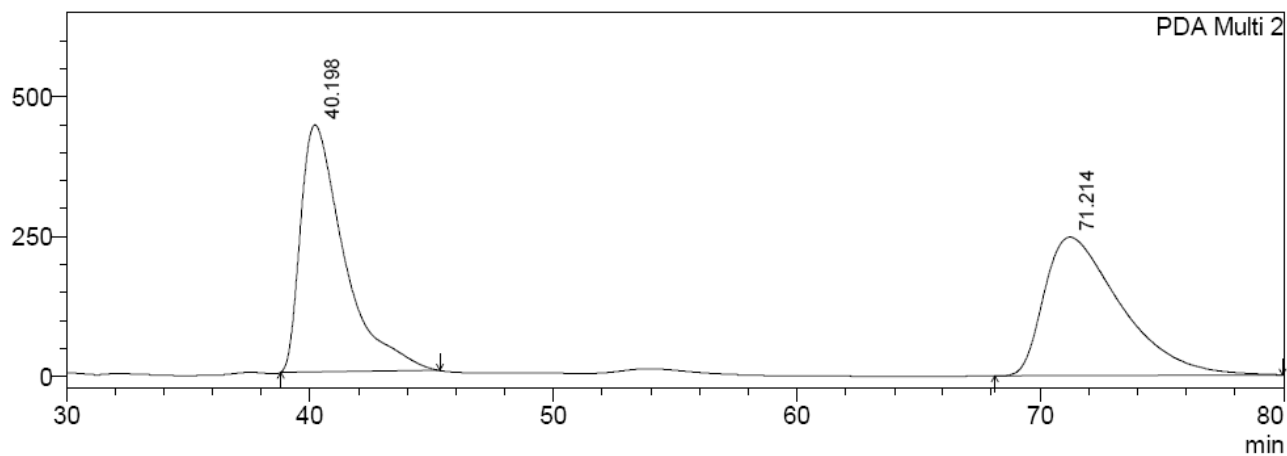

PDA Ch2 220nm 4nm

| Peak# | Ret. Time | Area      | Height | Area %  | Height % |
|-------|-----------|-----------|--------|---------|----------|
| 1     | 40.198    | 55071218  | 441181 | 50.445  | 64.093   |
| 2     | 71.214    | 54099806  | 247161 | 49.555  | 35.907   |
| Total |           | 109171024 | 688343 | 100.000 | 100.000  |

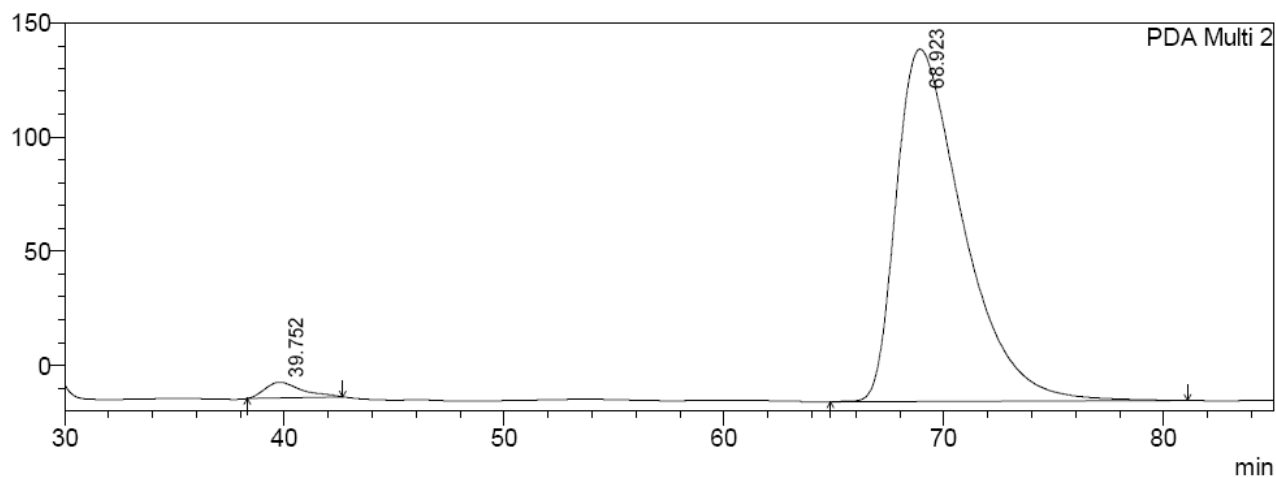

PDA Ch1 254nm 4nm

| Peak# | Ret. Time | Area     | Height | Area %  | Height % |
|-------|-----------|----------|--------|---------|----------|
| 1     | 39.747    | 266029   | 2192   | 2.470   | 4.229    |
| 2     | 68.926    | 10505512 | 49645  | 97.530  | 95.771   |
| Total |           | 10771540 | 51838  | 100.000 | 100.000  |



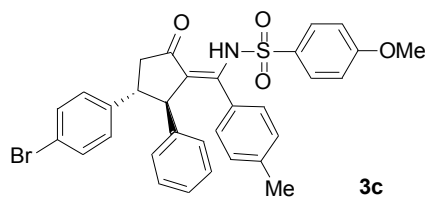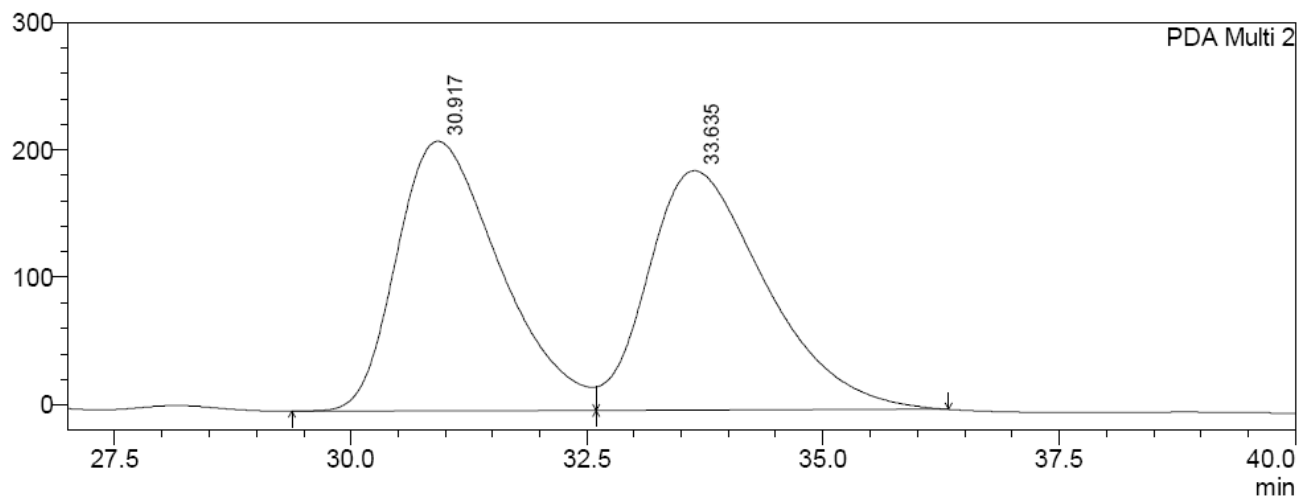

PDA Ch2 220nm 4mm

| Peak# | Ret. Time | Area     | Height | Area %  | Height % |
|-------|-----------|----------|--------|---------|----------|
| 1     | 30.917    | 16154163 | 211663 | 49.713  | 52.958   |
| 2     | 33.635    | 16340829 | 188015 | 50.287  | 47.042   |
| Total |           | 32494993 | 399678 | 100.000 | 100.000  |

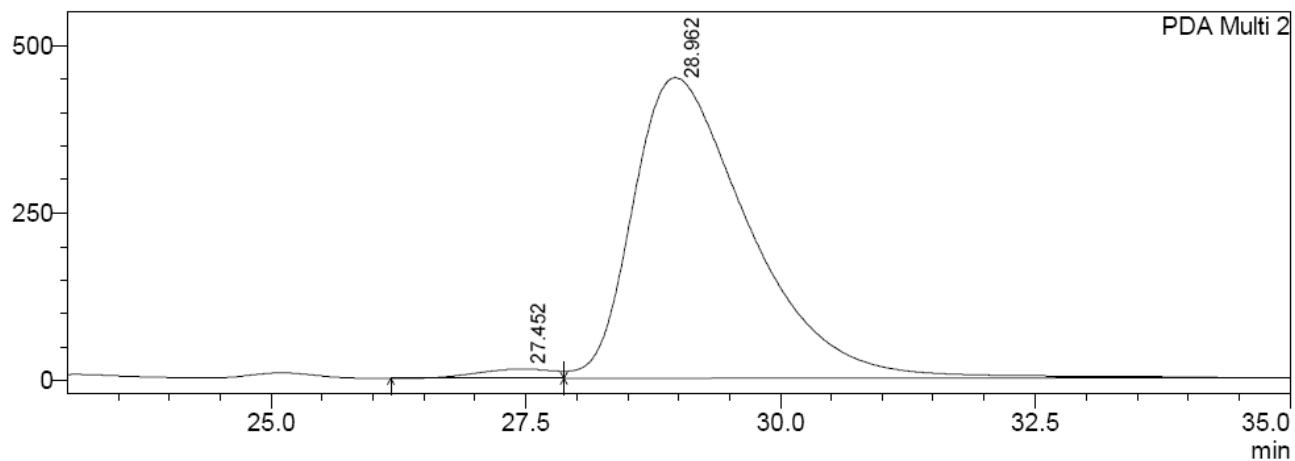

PDA Ch2 220nm 4mm

| Peak# | Ret. Time | Area     | Height | Area %  | Height % |
|-------|-----------|----------|--------|---------|----------|
| 1     | 27.452    | 731405   | 13768  | 2.000   | 2.976    |
| 2     | 28.962    | 35843807 | 448929 | 98.000  | 97.024   |
| Total |           | 36575212 | 462696 | 100.000 | 100.000  |

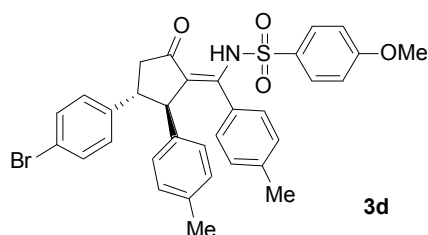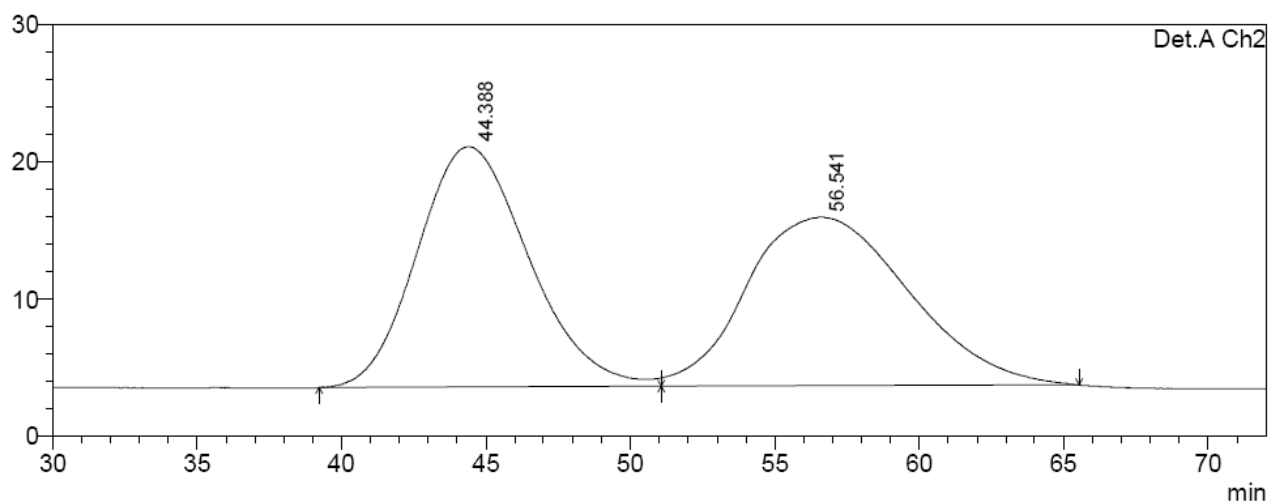

UV Detector Ch2 220nm

| Peak# | Ret. Time | Area    | Height | Area %  | Height % |
|-------|-----------|---------|--------|---------|----------|
| 1     | 44.388    | 4713645 | 17546  | 49.561  | 58.770   |
| 2     | 56.541    | 4797223 | 12309  | 50.439  | 41.230   |
| Total |           | 9510868 | 29855  | 100.000 | 100.000  |

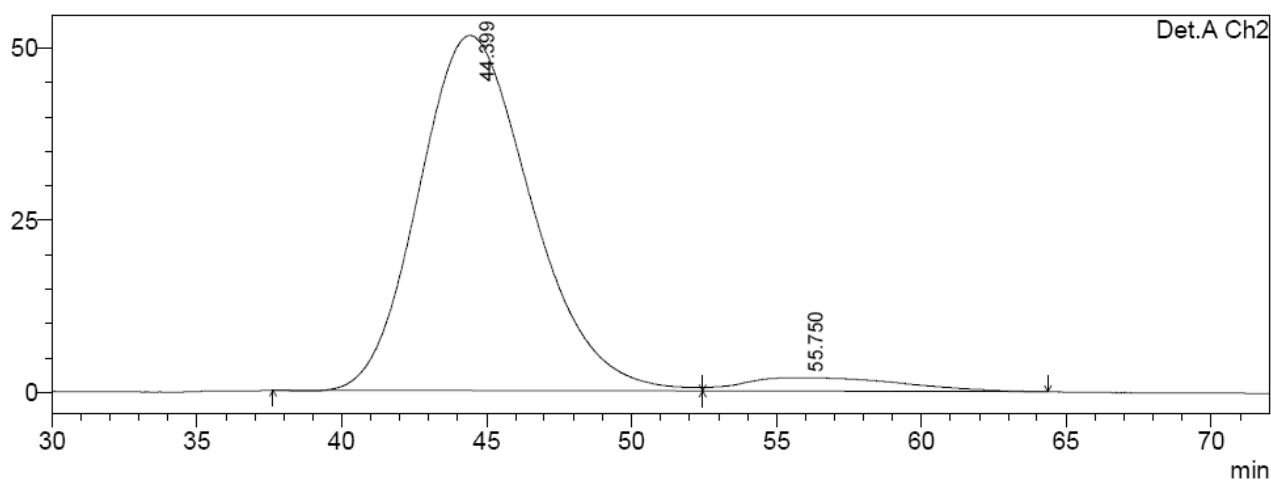

UV Detector Ch2 220nm

| Peak# | Ret. Time | Area     | Height | Area %  | Height % |
|-------|-----------|----------|--------|---------|----------|
| 1     | 44.399    | 13875250 | 51488  | 94.827  | 96.305   |
| 2     | 55.750    | 756853   | 1975   | 5.173   | 3.695    |
| Total |           | 14632103 | 53464  | 100.000 | 100.000  |

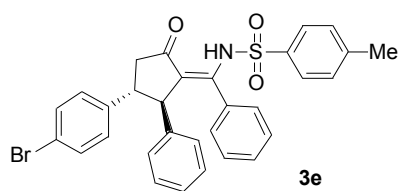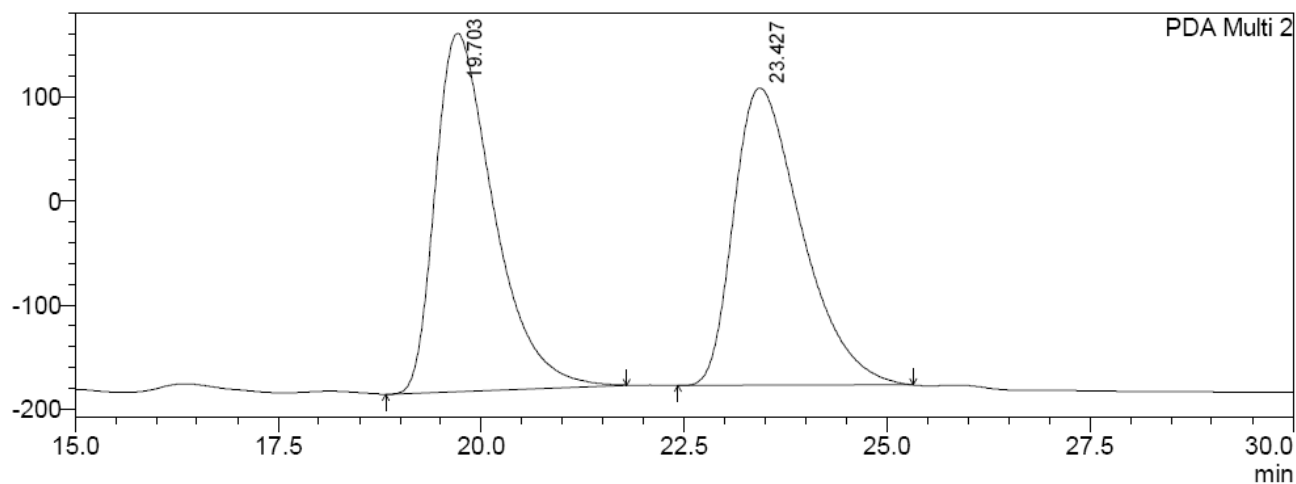

PDA Ch2 220nm 4mm

| Peak# | Ret. Time | Area     | Height | Area %  | Height % |
|-------|-----------|----------|--------|---------|----------|
| 1     | 19.703    | 17244035 | 344072 | 50.822  | 54.644   |
| 2     | 23.427    | 16686178 | 285595 | 49.178  | 45.356   |
| Total |           | 33930213 | 629667 | 100.000 | 100.000  |

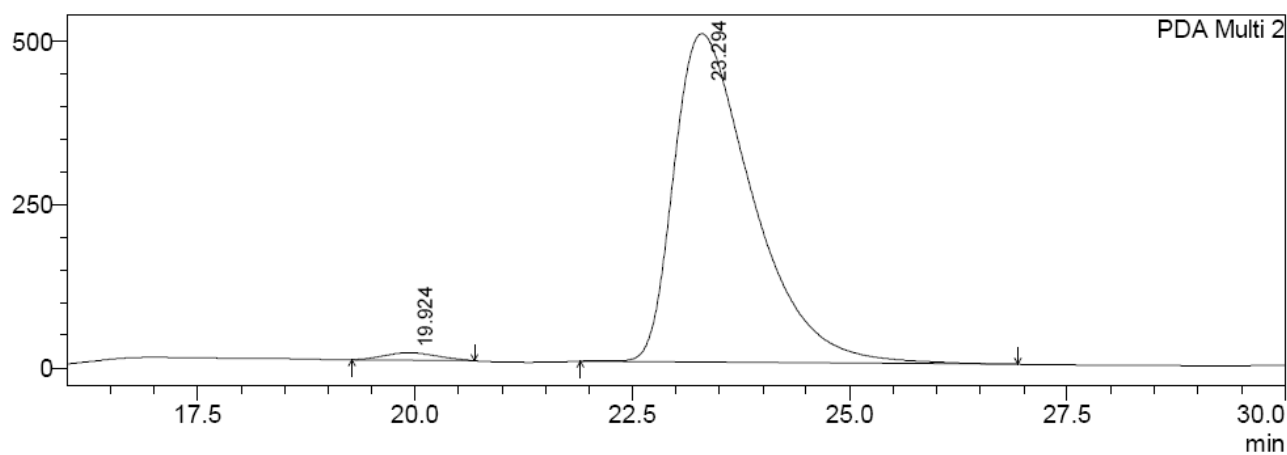

PDA Ch2 220nm 4mm

| Peak# | Ret. Time | Area     | Height | Area %  | Height % |
|-------|-----------|----------|--------|---------|----------|
| 1     | 19.924    | 482756   | 11251  | 1.498   | 2.189    |
| 2     | 23.294    | 31748848 | 502822 | 98.502  | 97.811   |
| Total |           | 32231604 | 514073 | 100.000 | 100.000  |

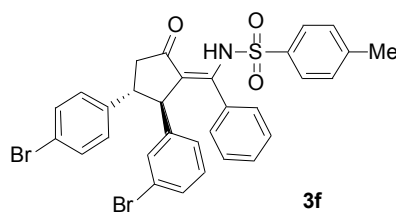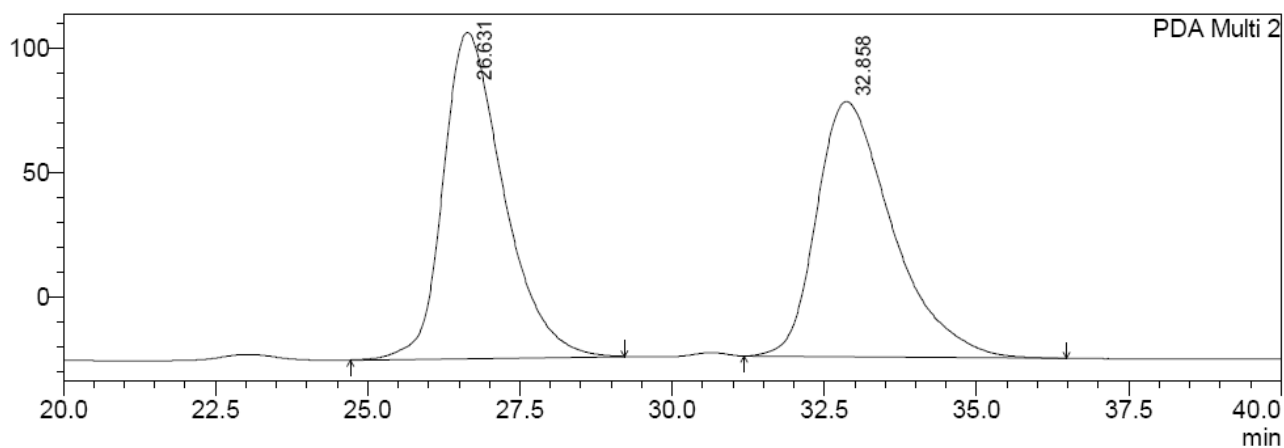

PDA Ch2 220nm 4mm

| Peak# | Ret. Time | Area     | Height | Area %  | Height % |
|-------|-----------|----------|--------|---------|----------|
| 1     | 26.631    | 9074398  | 131244 | 50.375  | 56.080   |
| 2     | 32.858    | 8939311  | 102788 | 49.625  | 43.920   |
| Total |           | 18013709 | 234032 | 100.000 | 100.000  |

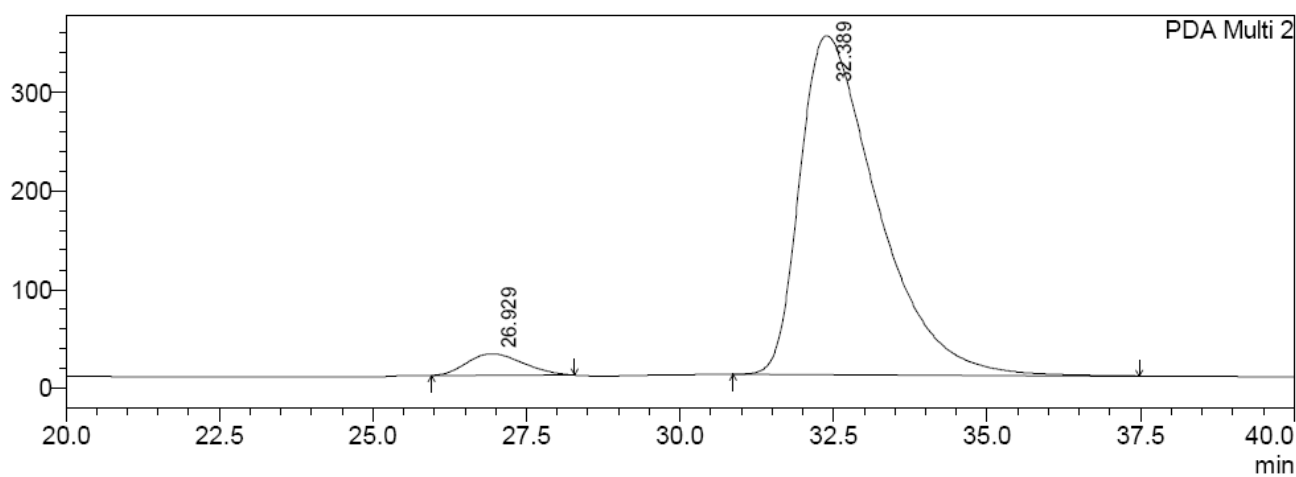

PDA Ch2 220nm 4mm

| Peak# | Ret. Time | Area     | Height | Area %  | Height % |
|-------|-----------|----------|--------|---------|----------|
| 1     | 26.929    | 1398315  | 21929  | 4.431   | 6.007    |
| 2     | 32.389    | 30159444 | 343159 | 95.569  | 93.993   |
| Total |           | 31557759 | 365088 | 100.000 | 100.000  |

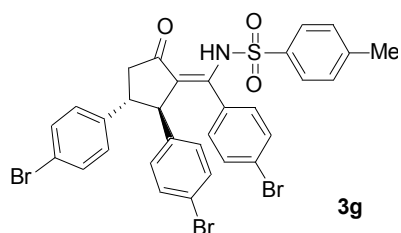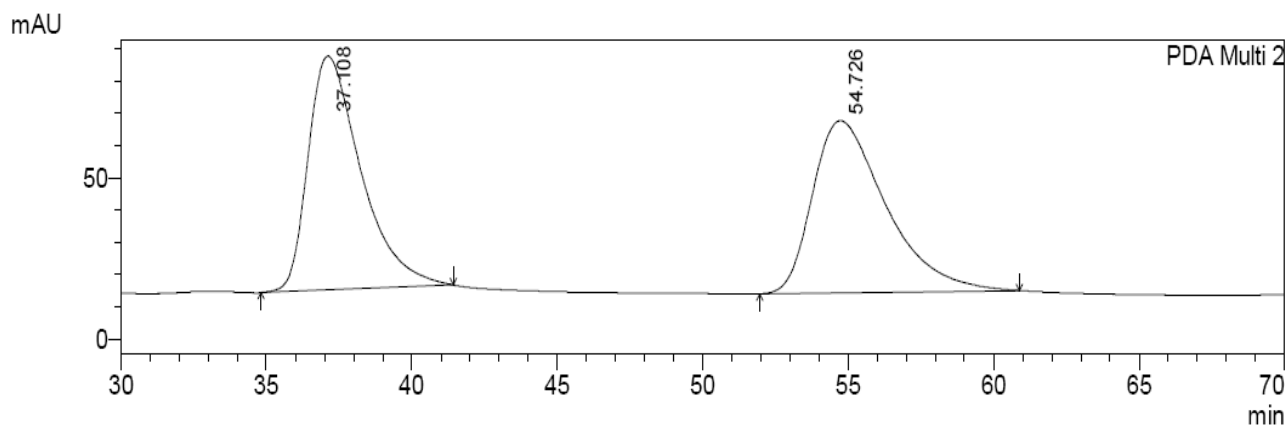

PeakTable

PDA Ch2 220nm 4mm

| Peak# | Ret. Time | Area     | Height | Area %  | Height % |
|-------|-----------|----------|--------|---------|----------|
| 1     | 37.108    | 9197731  | 72622  | 49.500  | 57.612   |
| 2     | 54.726    | 9383664  | 53430  | 50.500  | 42.388   |
| Total |           | 18581394 | 126052 | 100.000 | 100.000  |

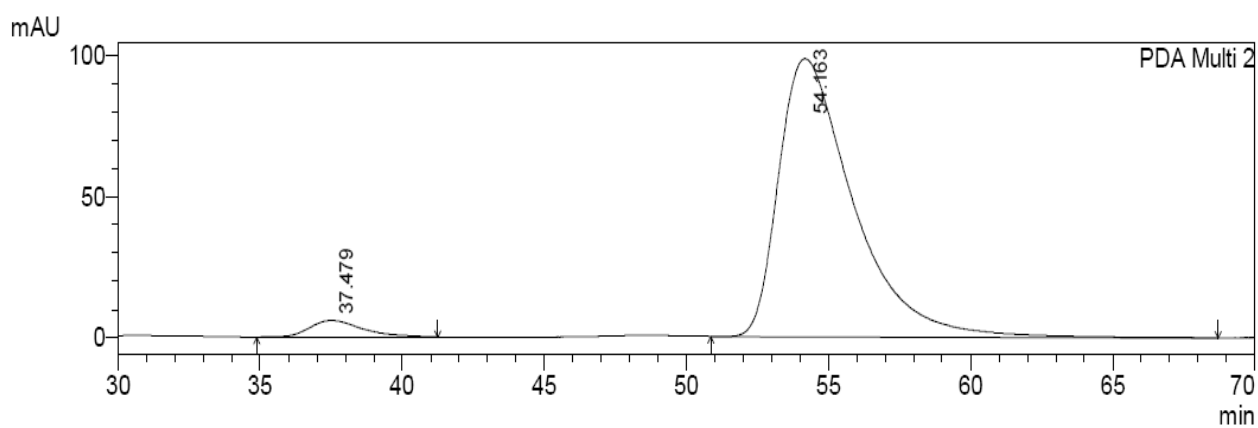

PeakTable

PDA Ch2 220nm 4mm

| Peak# | Ret. Time | Area     | Height | Area %  | Height % |
|-------|-----------|----------|--------|---------|----------|
| 1     | 37.479    | 774475   | 5941   | 4.125   | 5.684    |
| 2     | 54.163    | 17999234 | 98575  | 95.875  | 94.316   |
| Total |           | 18773709 | 104517 | 100.000 | 100.000  |

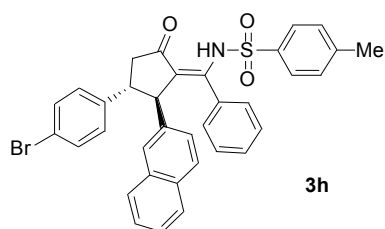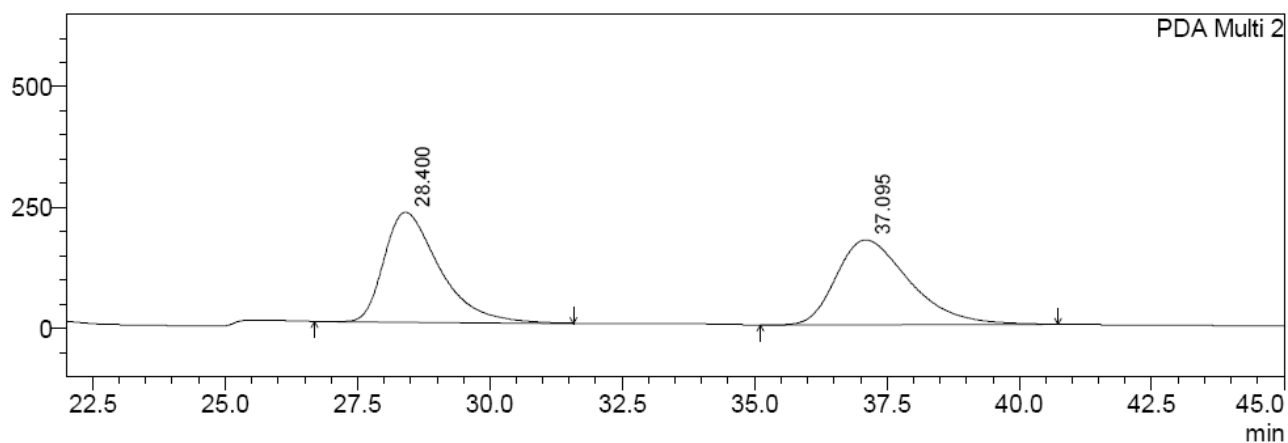

PDA Ch2 220nm 4nm

| Peak# | Ret. Time | Area     | Height | Area %  | Height % |
|-------|-----------|----------|--------|---------|----------|
| 1     | 28.400    | 16544280 | 227277 | 49.495  | 56.392   |
| 2     | 37.095    | 16881651 | 175755 | 50.505  | 43.608   |
| Total |           | 33425930 | 403032 | 100.000 | 100.000  |

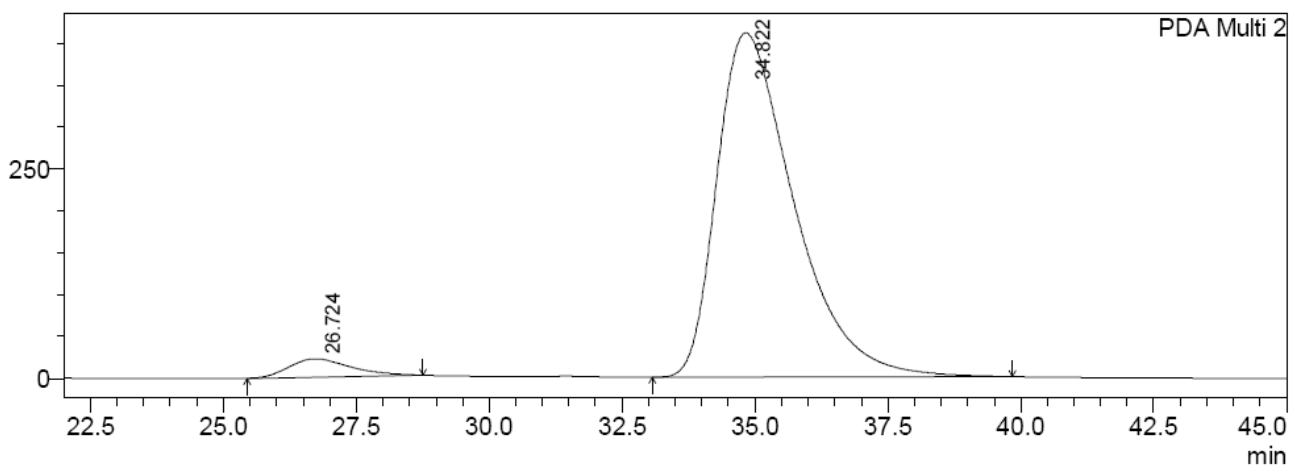

PDA Ch2 220nm 4nm

| Peak# | Ret. Time | Area     | Height | Area %  | Height % |
|-------|-----------|----------|--------|---------|----------|
| 1     | 26.724    | 1776916  | 21836  | 4.099   | 5.047    |
| 2     | 34.822    | 41570379 | 410857 | 95.901  | 94.953   |
| Total |           | 43347295 | 432693 | 100.000 | 100.000  |

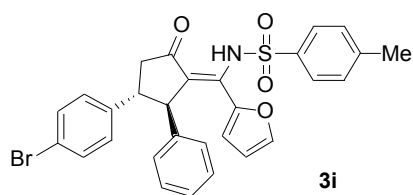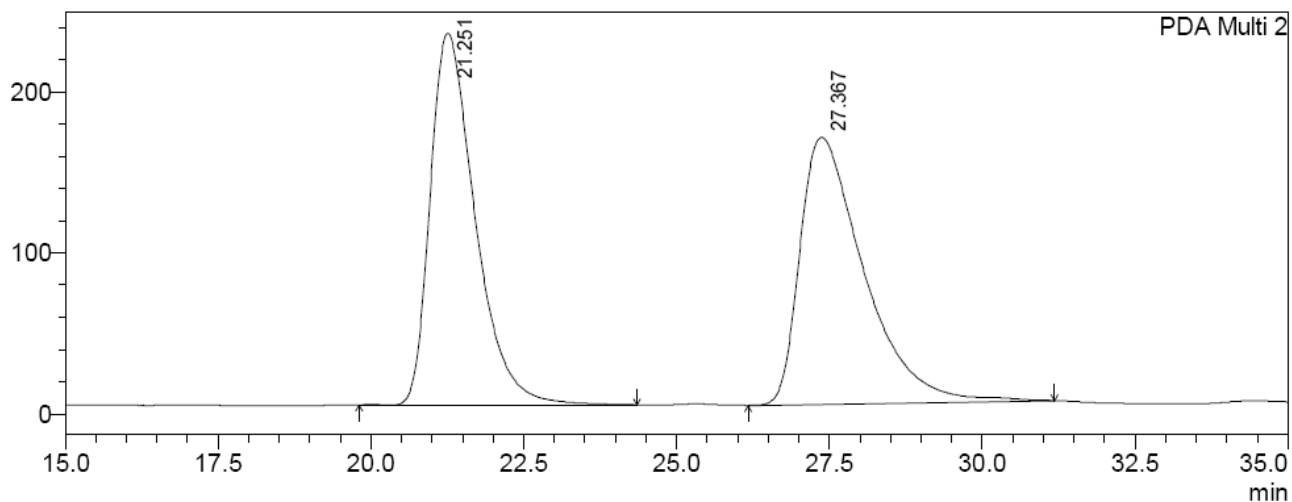

PDA Ch2 220mm 4mm

| Peak# | Ret. Time | Area     | Height | Area %  | Height % |
|-------|-----------|----------|--------|---------|----------|
| 1     | 21.251    | 11792799 | 230633 | 49.343  | 58.165   |
| 2     | 27.367    | 12106847 | 165881 | 50.657  | 41.835   |
| Total |           | 23899646 | 396514 | 100.000 | 100.000  |

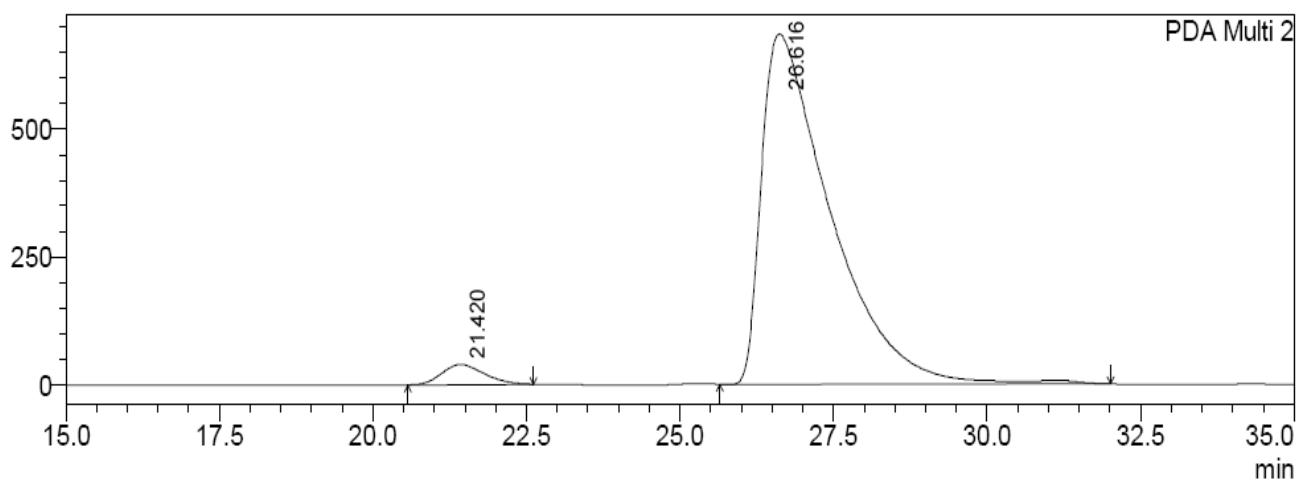

PDA Ch2 220mm 4mm

| Peak# | Ret. Time | Area     | Height | Area %  | Height % |
|-------|-----------|----------|--------|---------|----------|
| 1     | 21.420    | 1892251  | 39185  | 3.409   | 5.417    |
| 2     | 26.616    | 53609608 | 684195 | 96.591  | 94.583   |
| Total |           | 55501860 | 723380 | 100.000 | 100.000  |

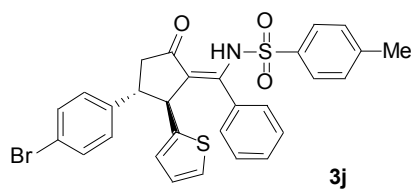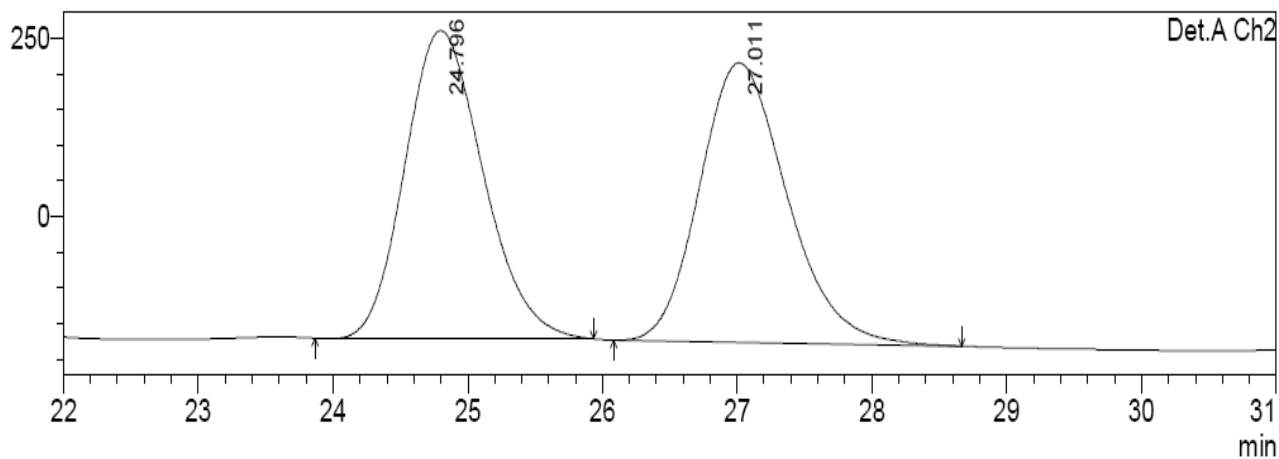

UV Detector Ch2 220nm

| Peak# | Ret. Time | Area     | Height | Area %  | Height % |
|-------|-----------|----------|--------|---------|----------|
| 1     | 24.796    | 17430568 | 432117 | 49.617  | 52.417   |
| 2     | 27.011    | 17699514 | 392267 | 50.383  | 47.583   |
| Total |           | 35130082 | 824384 | 100.000 | 100.000  |

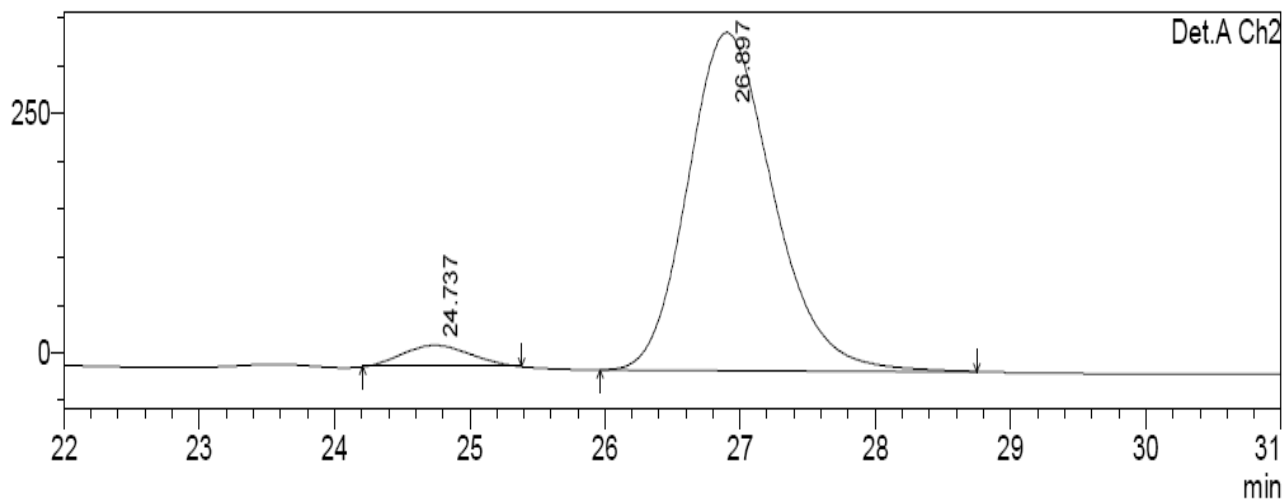

UV Detector Ch2 220nm

| Peak# | Ret. Time | Area     | Height | Area %  | Height % |
|-------|-----------|----------|--------|---------|----------|
| 1     | 24.737    | 781985   | 22086  | 4.788   | 5.892    |
| 2     | 26.897    | 15551524 | 352762 | 95.212  | 94.108   |
| Total |           | 16333509 | 374848 | 100.000 | 100.000  |



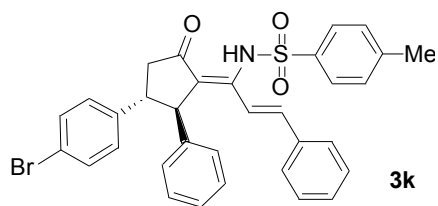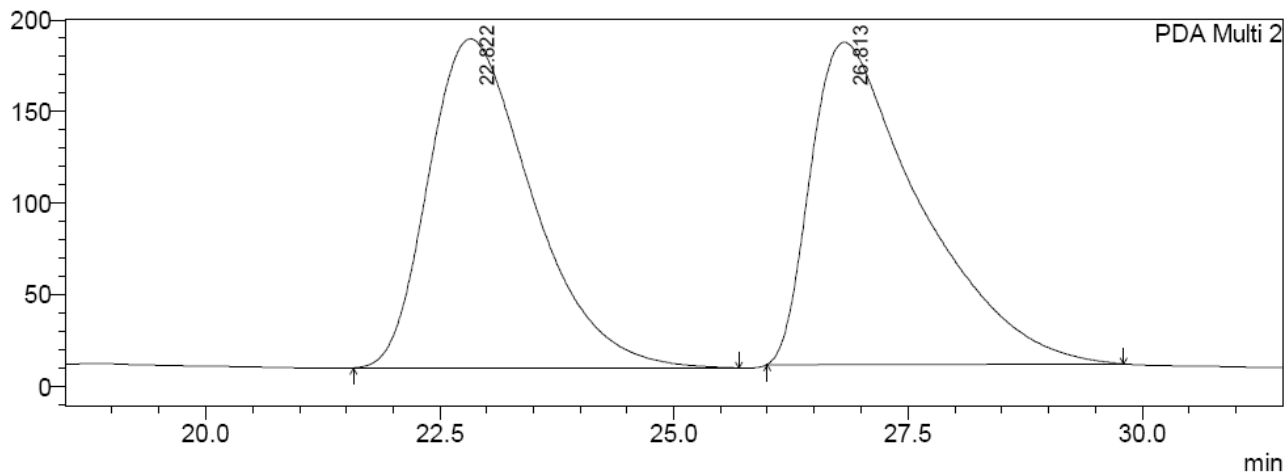

PDA Ch2 220nm 4mm

| Peak# | Ret. Time | Area     | Height | Area %  | Height % |
|-------|-----------|----------|--------|---------|----------|
| 1     | 22.822    | 13836994 | 179350 | 49.181  | 50.526   |
| 2     | 26.813    | 14297921 | 175618 | 50.819  | 49.474   |
| Total |           | 28134915 | 354968 | 100.000 | 100.000  |

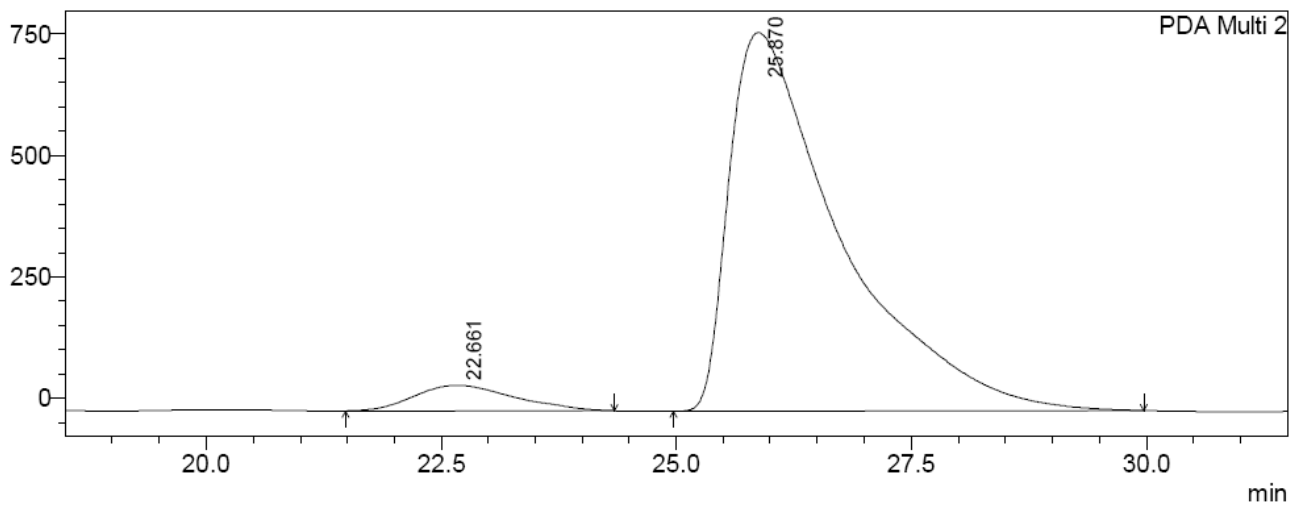

PDA Ch2 220nm 4mm

| Peak# | Ret. Time | Area     | Height | Area %  | Height % |
|-------|-----------|----------|--------|---------|----------|
| 1     | 22.661    | 3919285  | 52512  | 5.739   | 6.310    |
| 2     | 25.870    | 64372249 | 779750 | 94.261  | 93.690   |
| Total |           | 68291534 | 832262 | 100.000 | 100.000  |

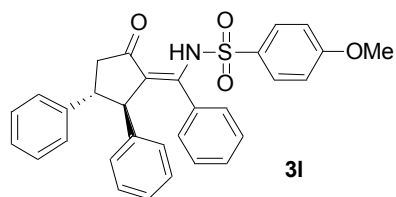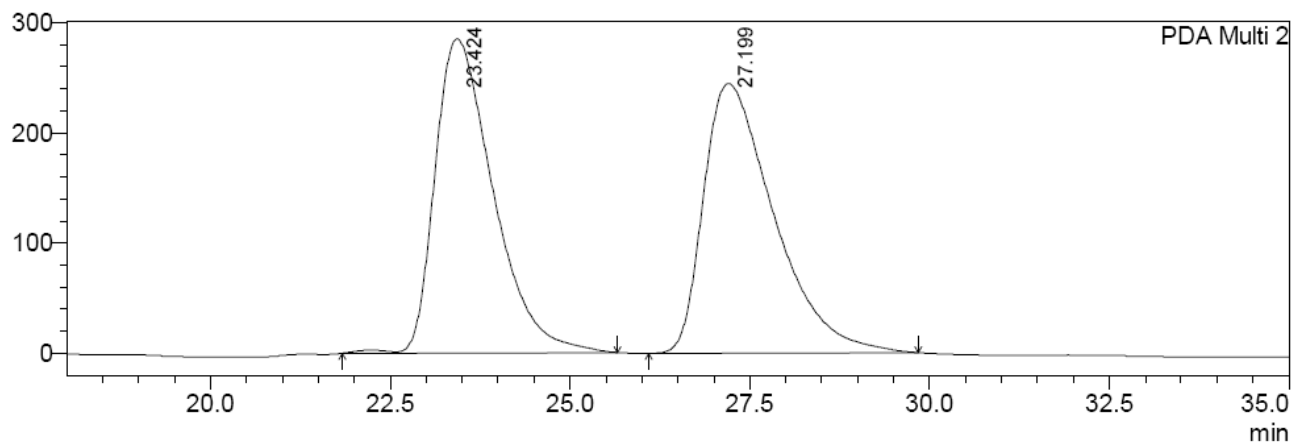

PDA Ch2 220nm 4mm

| Peak# | Ret. Time | Area     | Height | Area %  | Height % |
|-------|-----------|----------|--------|---------|----------|
| 1     | 23.424    | 16105192 | 284665 | 49.137  | 53.796   |
| 2     | 27.199    | 16671233 | 244487 | 50.863  | 46.204   |
| Total |           | 32776424 | 529152 | 100.000 | 100.000  |

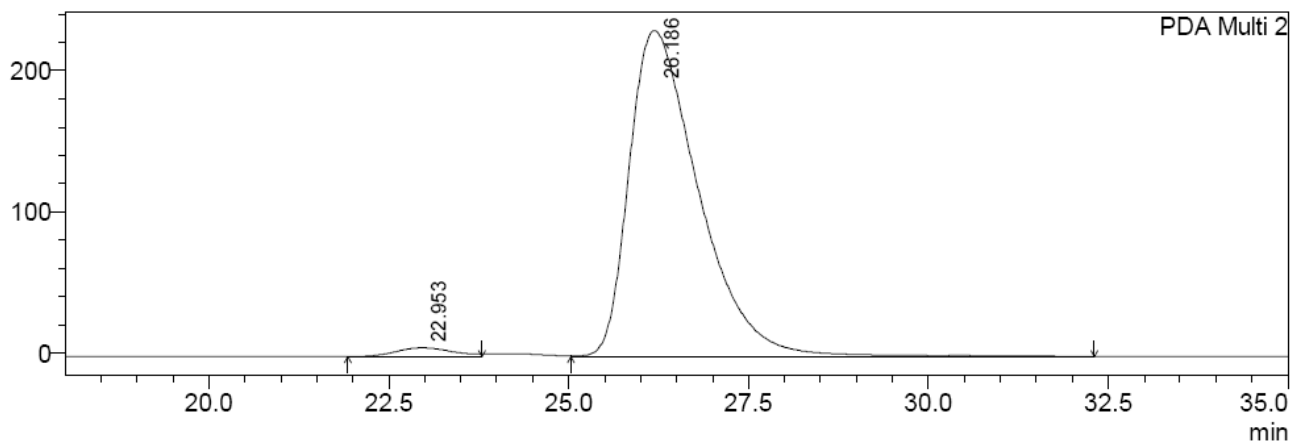

PDA Ch2 220nm 4mm

| Peak# | Ret. Time | Area     | Height | Area %  | Height % |
|-------|-----------|----------|--------|---------|----------|
| 1     | 22.953    | 340747   | 6175   | 2.141   | 2.604    |
| 2     | 26.186    | 15572491 | 230904 | 97.859  | 97.396   |
| Total |           | 15913238 | 237078 | 100.000 | 100.000  |

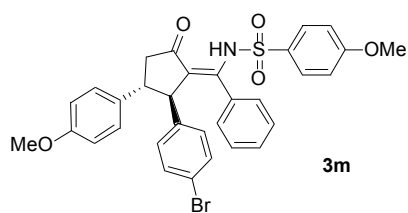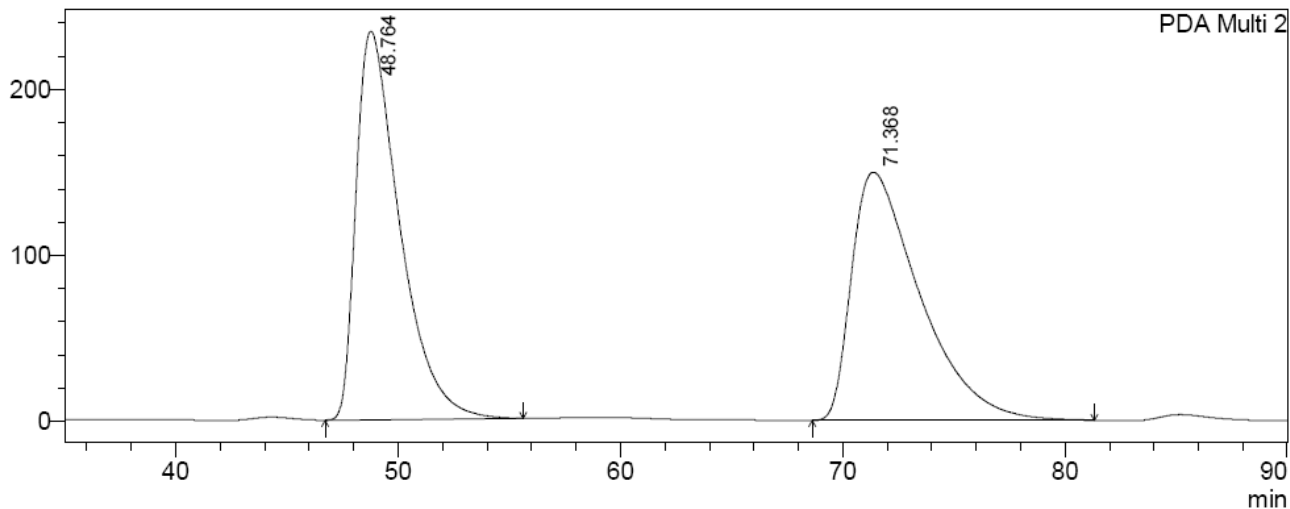

PDA Ch2 220mm 4mm

| Peak# | Ret. Time | Area     | Height | Area %  | Height % |
|-------|-----------|----------|--------|---------|----------|
| 1     | 48.764    | 32062734 | 234251 | 49.999  | 60.995   |
| 2     | 71.368    | 32063818 | 149796 | 50.001  | 39.005   |
| Total |           | 64126552 | 384047 | 100.000 | 100.000  |

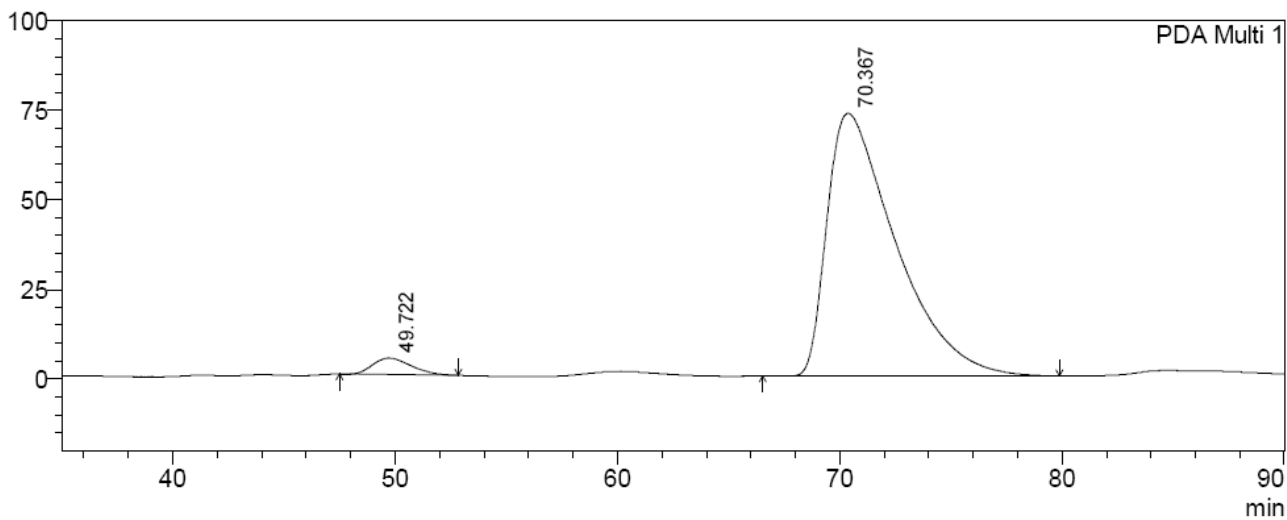

PDA Ch1 254nm 4mm

| Peak# | Ret. Time | Area     | Height | Area %  | Height % |
|-------|-----------|----------|--------|---------|----------|
| 1     | 49.722    | 561624   | 4622   | 3.436   | 5.922    |
| 2     | 70.367    | 15785013 | 73419  | 96.564  | 94.078   |
| Total |           | 16346637 | 78041  | 100.000 | 100.000  |

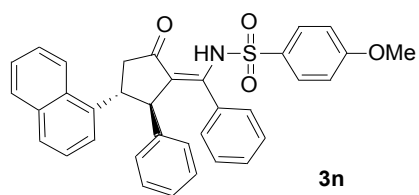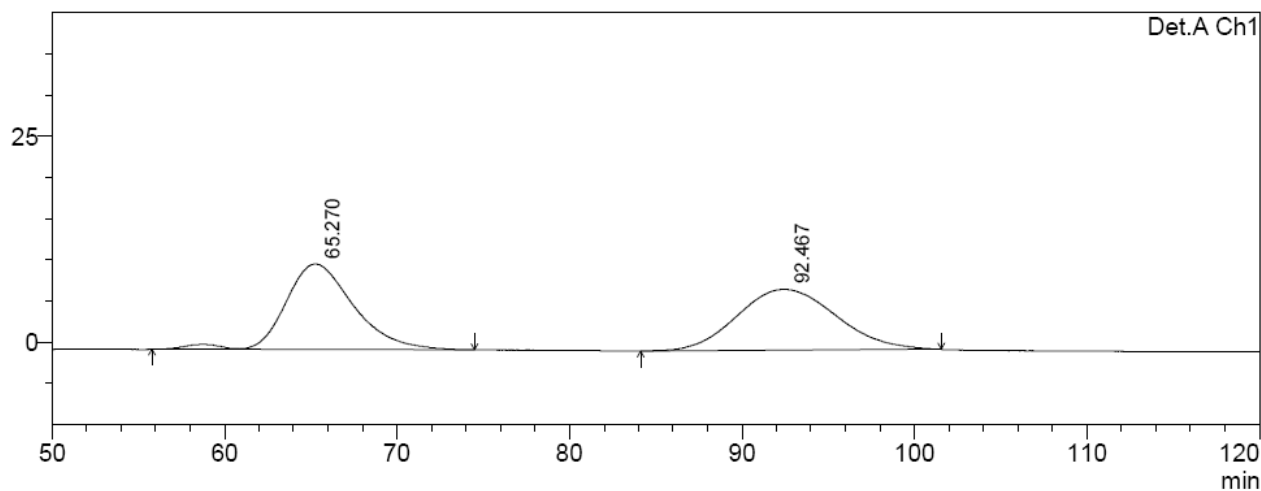

UV Detector Ch1 254nm

| Peak# | Ret. Time | Area    | Height | Area %  | Height % |
|-------|-----------|---------|--------|---------|----------|
| 1     | 65.270    | 2894021 | 10384  | 49.565  | 58.461   |
| 2     | 92.467    | 2944844 | 7378   | 50.435  | 41.539   |
| Total |           | 5838865 | 17762  | 100.000 | 100.000  |

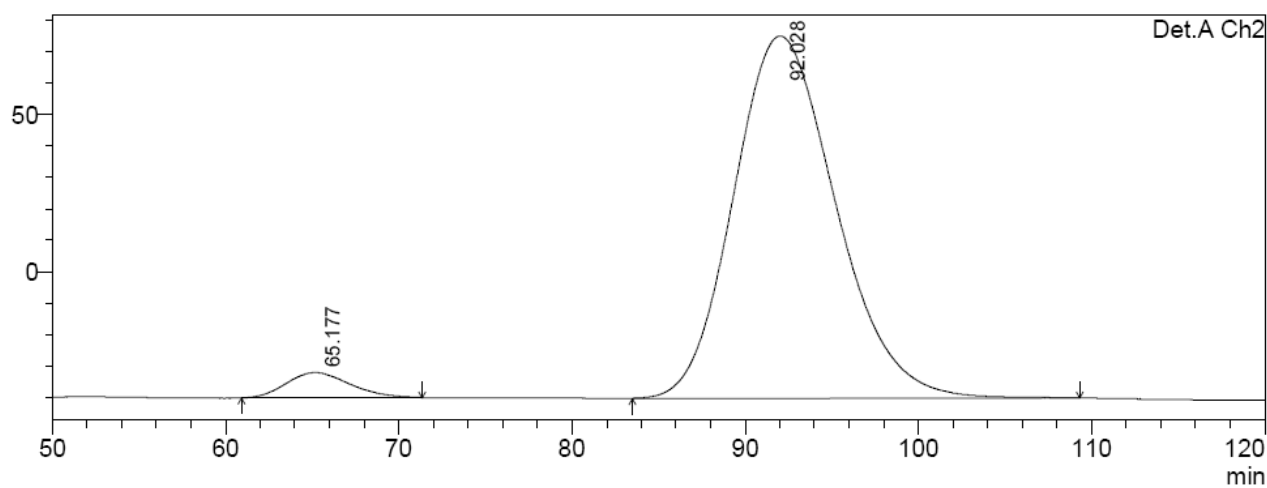

UV Detector Ch2 220nm

| Peak# | Ret. Time | Area     | Height | Area %  | Height % |
|-------|-----------|----------|--------|---------|----------|
| 1     | 65.177    | 2063359  | 8029   | 4.185   | 6.518    |
| 2     | 92.028    | 47234537 | 115156 | 95.815  | 93.482   |
| Total |           | 49297896 | 123185 | 100.000 | 100.000  |

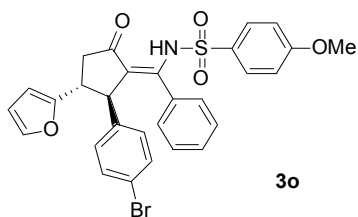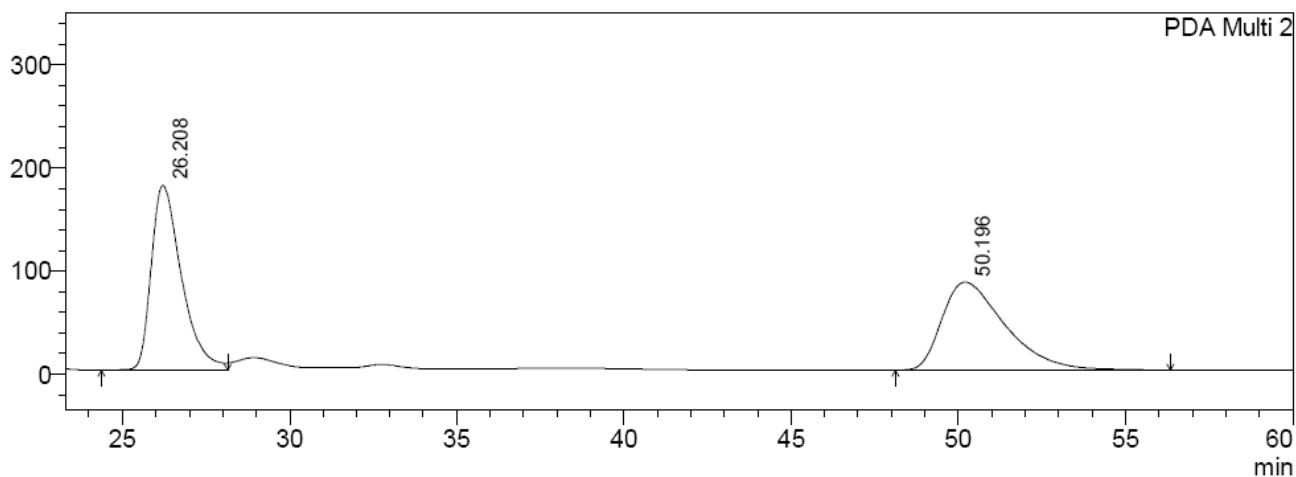

PDA Ch2 220nm 4mm

| Peak# | Ret. Time | Area     | Height | Area %  | Height % |
|-------|-----------|----------|--------|---------|----------|
| 1     | 26.208    | 11300438 | 179182 | 50.118  | 67.716   |
| 2     | 50.196    | 11247096 | 85426  | 49.882  | 32.284   |
| Total |           | 22547534 | 264608 | 100.000 | 100.000  |

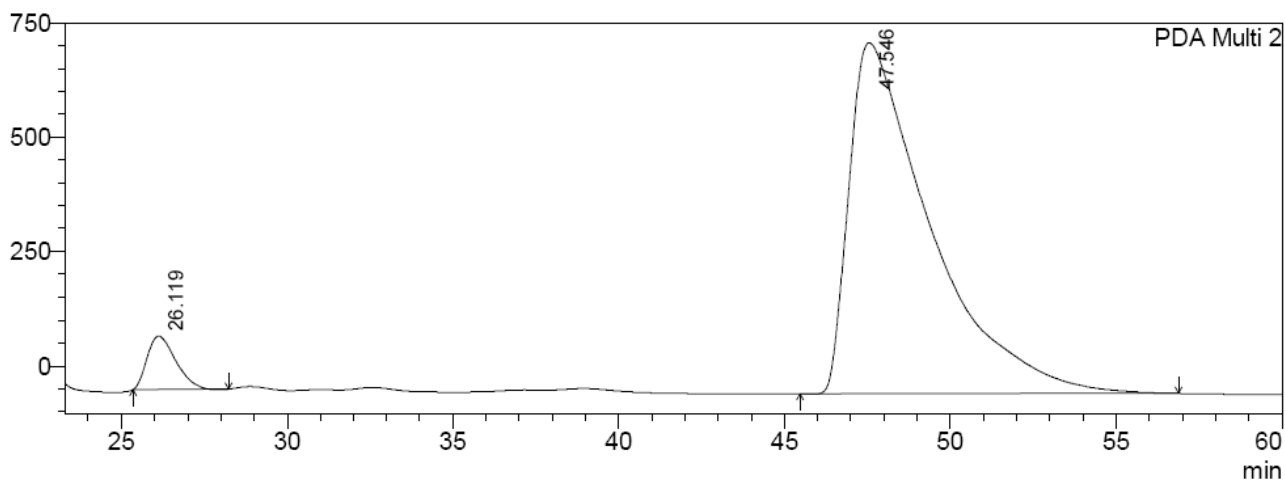

PDA Ch2 220nm 4mm

| Peak# | Ret. Time | Area      | Height | Area %  | Height % |
|-------|-----------|-----------|--------|---------|----------|
| 1     | 26.119    | 6946912   | 116838 | 5.039   | 13.214   |
| 2     | 47.546    | 130912789 | 767392 | 94.961  | 86.786   |
| Total |           | 137859702 | 884230 | 100.000 | 100.000  |

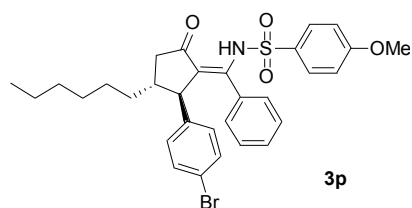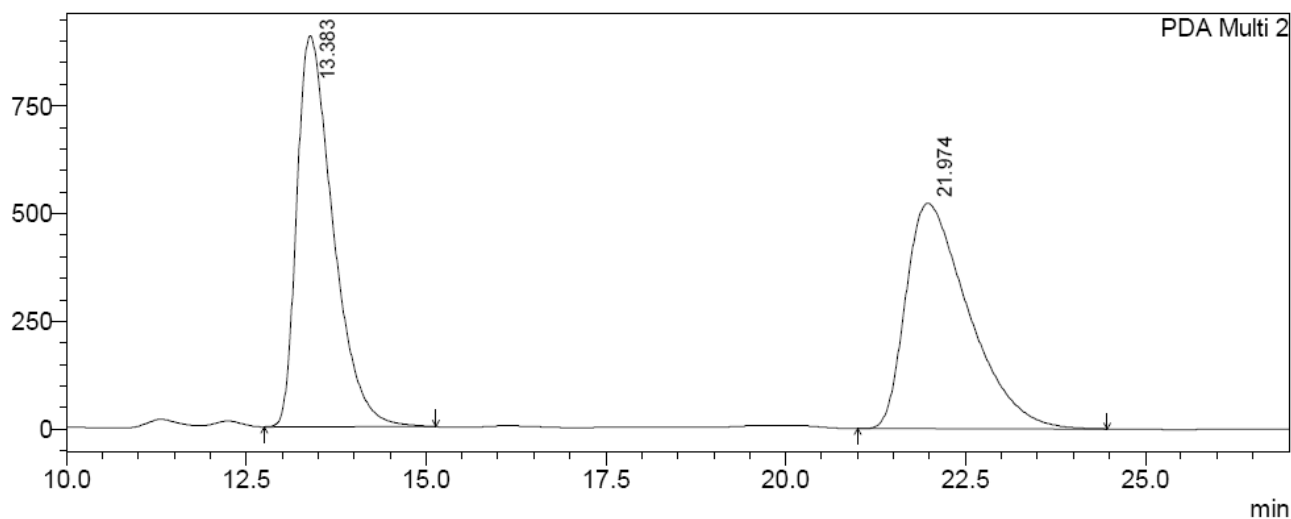

PDA Ch2 220nm 4nm

| Peak# | Ret. Time | Area     | Height  | Area %  | Height % |
|-------|-----------|----------|---------|---------|----------|
| 1     | 13.383    | 31827698 | 907224  | 50.014  | 63.427   |
| 2     | 21.974    | 31810462 | 523113  | 49.986  | 36.573   |
| Total |           | 63638160 | 1430337 | 100.000 | 100.000  |

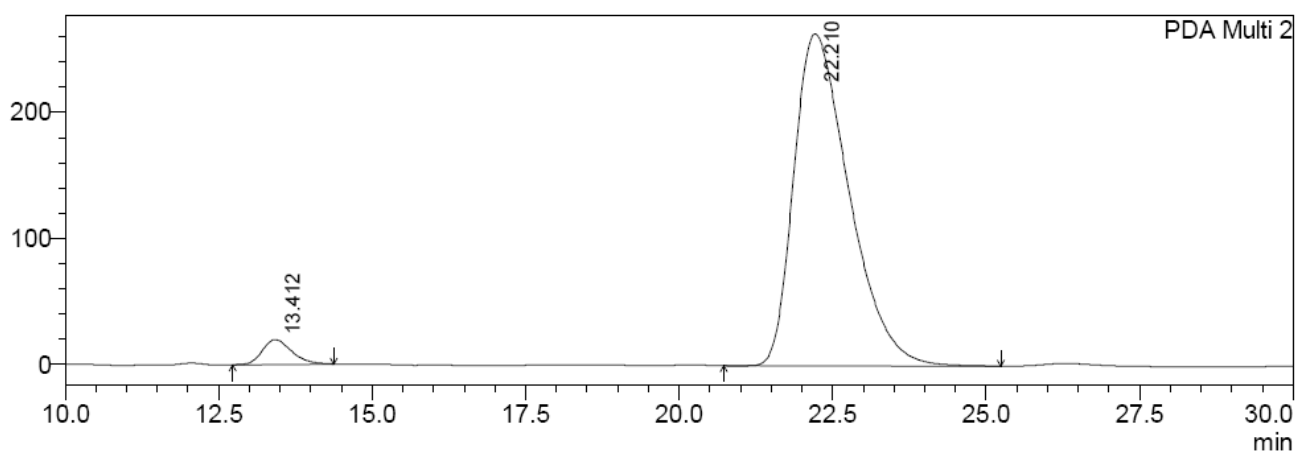

PDA Ch2 220nm 4nm

| Peak# | Ret. Time | Area     | Height | Area %  | Height % |
|-------|-----------|----------|--------|---------|----------|
| 1     | 13.412    | 656427   | 19658  | 3.817   | 6.935    |
| 2     | 22.210    | 16541195 | 263815 | 96.183  | 93.065   |
| Total |           | 17197622 | 283473 | 100.000 | 100.000  |

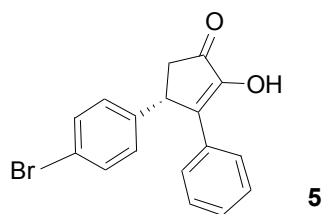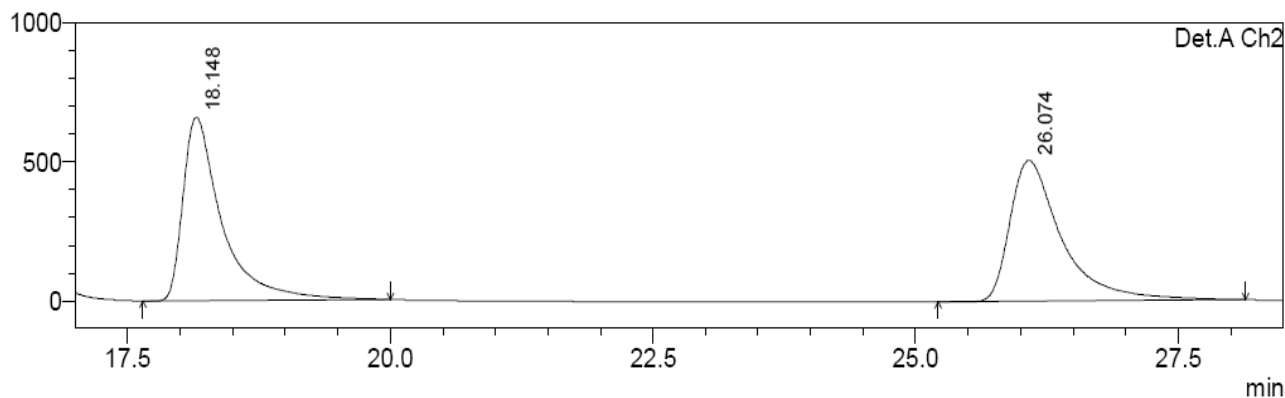

UV Detector Ch2 220nm

| Peak# | Ret. Time | Area     | Height  | Area %  | Height % |
|-------|-----------|----------|---------|---------|----------|
| 1     | 18.148    | 17026599 | 660299  | 49.522  | 56.564   |
| 2     | 26.074    | 17355297 | 507044  | 50.478  | 43.436   |
| Total |           | 34381896 | 1167343 | 100.000 | 100.000  |

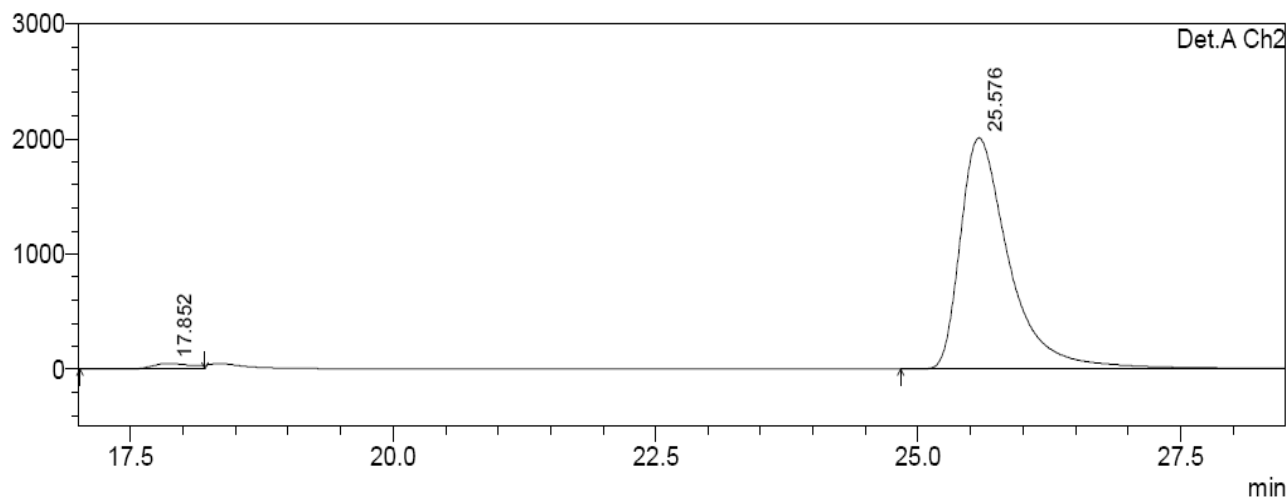

UV Detector Ch2 220nm

| Peak# | Ret. Time | Area     | Height  | Area %  | Height % |
|-------|-----------|----------|---------|---------|----------|
| 1     | 17.852    | 1357385  | 48892   | 2.035   | 2.379    |
| 2     | 25.576    | 65348183 | 2006227 | 97.965  | 97.621   |
| Total |           | 66705568 | 2055119 | 100.000 | 100.000  |

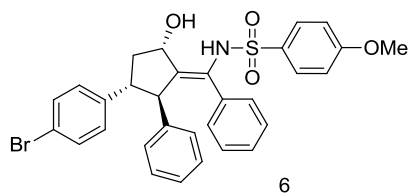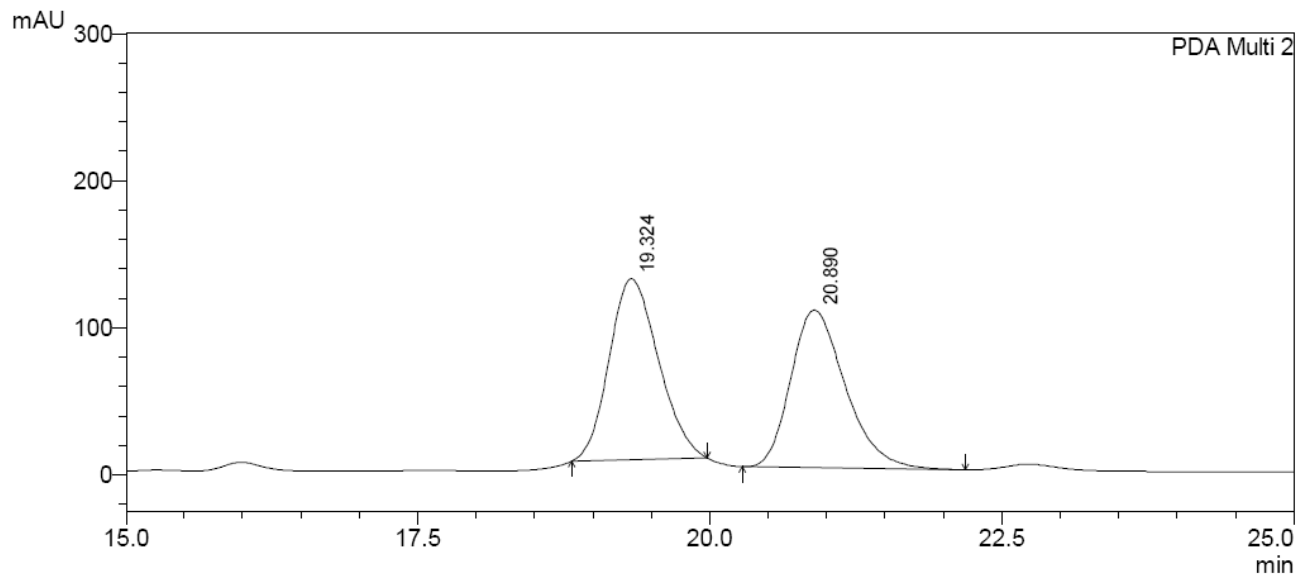

PDA Ch2 220nm 4mm

| Peak# | Ret. Time | Area    | Height | Area %  | Height % |
|-------|-----------|---------|--------|---------|----------|
| 1     | 19.324    | 3623827 | 123241 | 50.911  | 53.455   |
| 2     | 20.890    | 3494088 | 107311 | 49.089  | 46.545   |
| Total |           | 7117915 | 230552 | 100.000 | 100.000  |

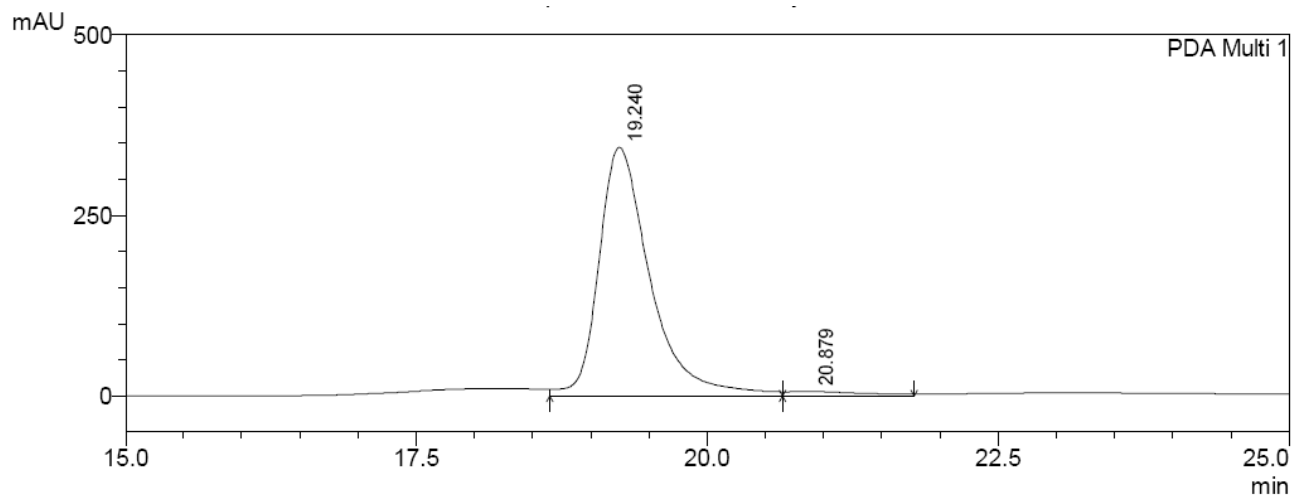

PDA Ch1 254nm 4mm

| Peak# | Ret. Time | Area     | Height | Area %  | Height % |
|-------|-----------|----------|--------|---------|----------|
| 1     | 19.240    | 10624722 | 344378 | 97.137  | 98.178   |
| 2     | 20.879    | 313151   | 6393   | 2.863   | 1.822    |
| Total |           | 10937873 | 350771 | 100.000 | 100.000  |



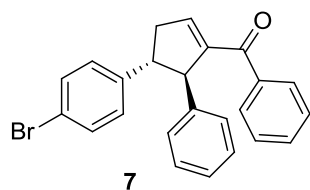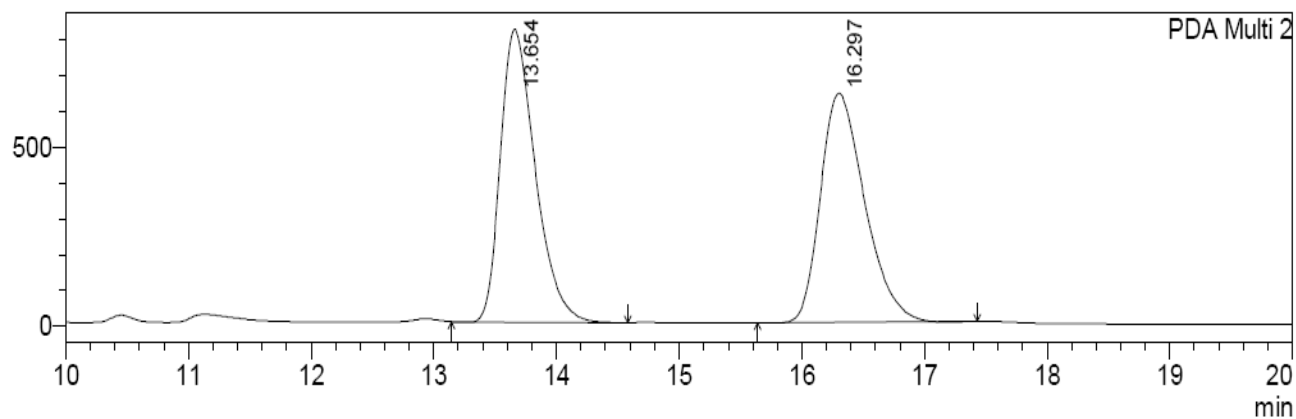

PDA Ch2 220mm 4mm

| Peak# | Ret. Time | Area     | Height  | Area %  | Height % |
|-------|-----------|----------|---------|---------|----------|
| 1     | 13.654    | 16177125 | 817683  | 50.271  | 56.093   |
| 2     | 16.297    | 16002559 | 640053  | 49.729  | 43.907   |
| Total |           | 32179684 | 1457736 | 100.000 | 100.000  |

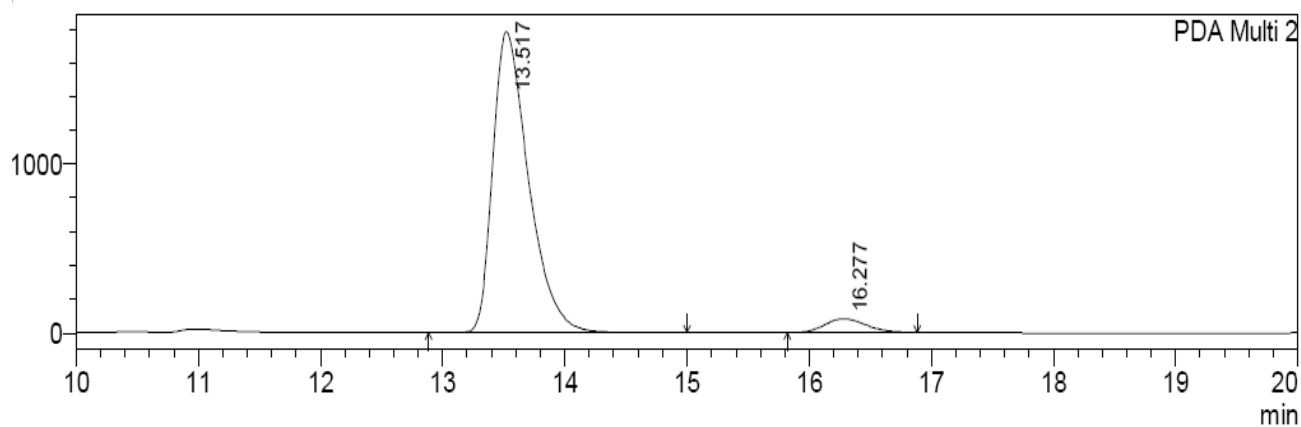

PDA Ch2 220mm 4mm

| Peak# | Ret. Time | Area     | Height  | Area %  | Height % |
|-------|-----------|----------|---------|---------|----------|
| 1     | 13.517    | 36328223 | 1781775 | 94.787  | 95.524   |
| 2     | 16.277    | 1997852  | 83492   | 5.213   | 4.476    |
| Total |           | 38326075 | 1865268 | 100.000 | 100.000  |

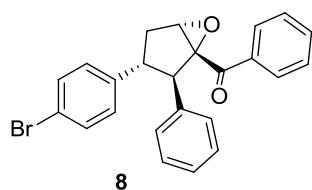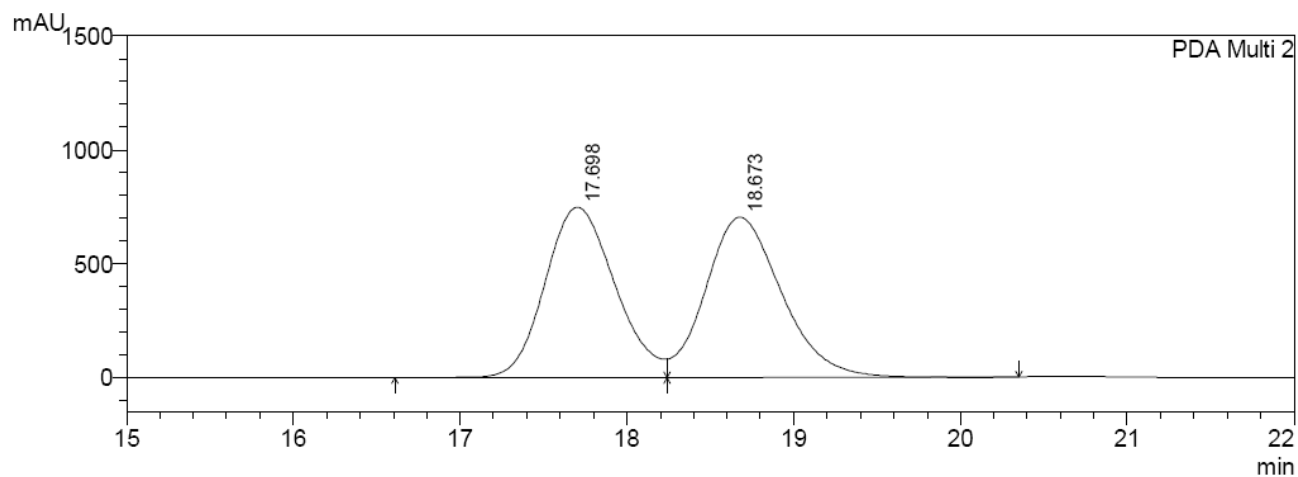

PDA Ch2 220nm 4nm

| Peak# | Ret. Time | Area     | Height  | Area %  | Height % |
|-------|-----------|----------|---------|---------|----------|
| 1     | 17.698    | 21812339 | 747755  | 49.701  | 51.577   |
| 2     | 18.673    | 22074373 | 702023  | 50.299  | 48.423   |
| Total |           | 43886712 | 1449777 | 100.000 | 100.000  |

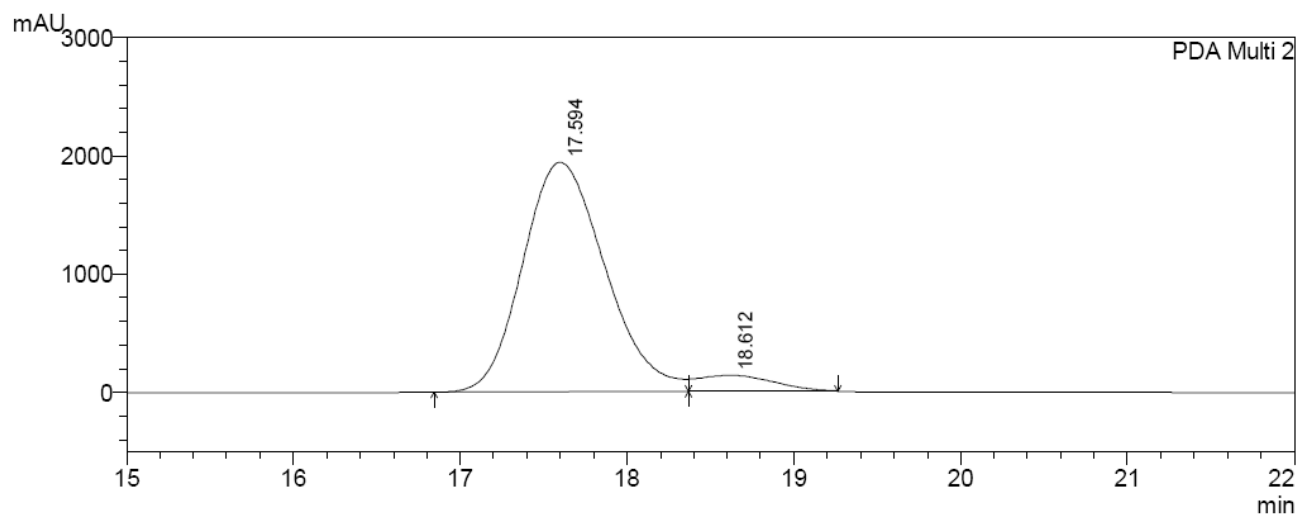

PDA Ch2 220nm 4nm

| Peak# | Ret. Time | Area     | Height  | Area %  | Height % |
|-------|-----------|----------|---------|---------|----------|
| 1     | 17.594    | 66748312 | 1940332 | 93.963  | 93.470   |
| 2     | 18.612    | 4288378  | 135560  | 6.037   | 6.530    |
| Total |           | 71036690 | 2075892 | 100.000 | 100.000  |

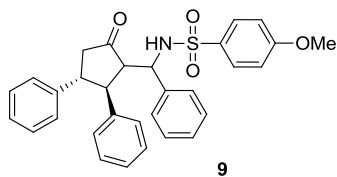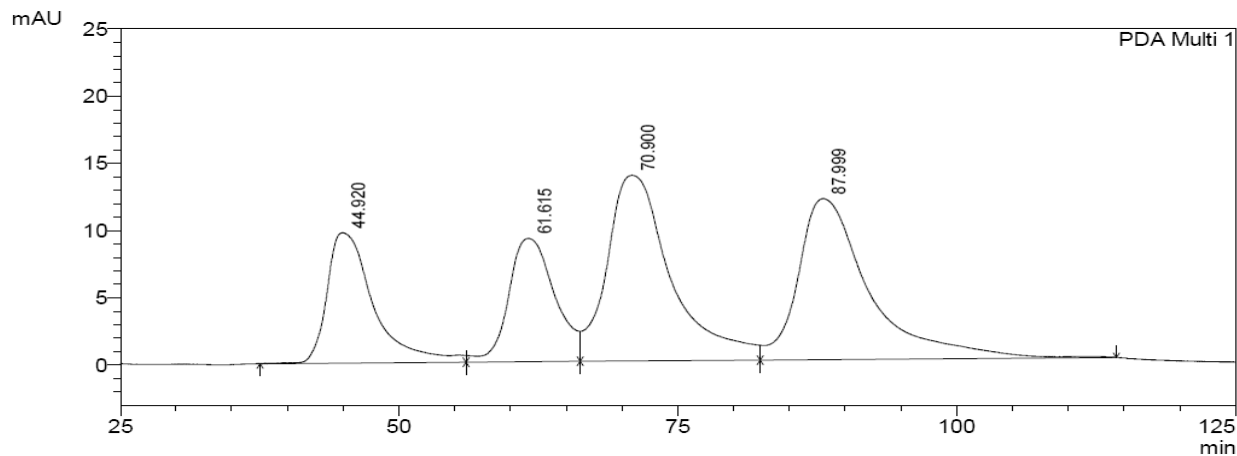

PDA Ch1 254nm 4nm

| Peak# | Ret. Time | Area     | Height | Area %  | Height % |
|-------|-----------|----------|--------|---------|----------|
| 1     | 44.920    | 2819073  | 9712   | 17.260  | 21.721   |
| 2     | 61.615    | 2651294  | 9184   | 16.233  | 20.540   |
| 3     | 70.900    | 5518406  | 13833  | 33.788  | 30.937   |
| 4     | 87.999    | 5343868  | 11984  | 32.719  | 26.802   |
| Total |           | 16332641 | 44713  | 100.000 | 100.000  |

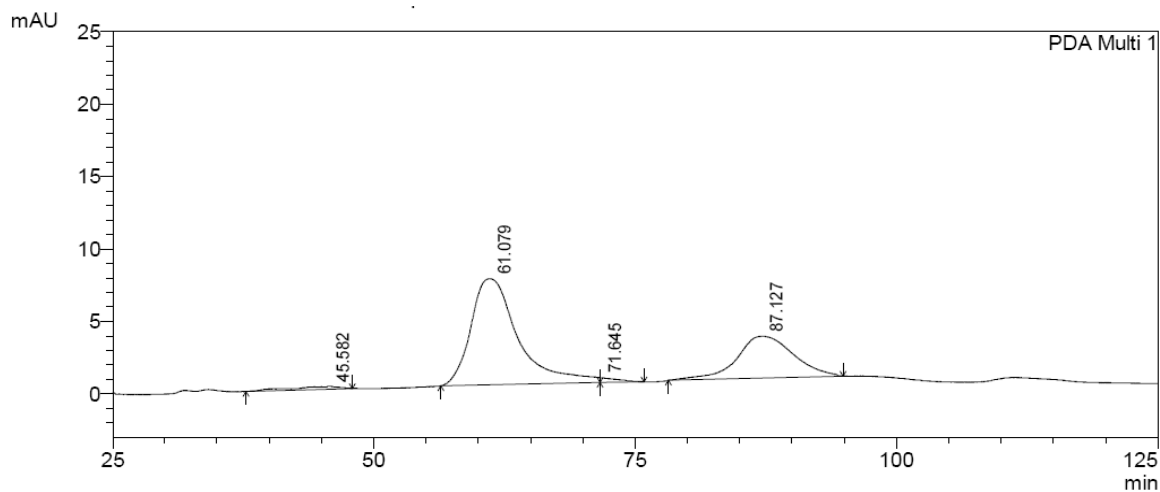

PDA Ch1 254nm 4nm

| Peak# | Ret. Time | Area    | Height | Area %  | Height % |
|-------|-----------|---------|--------|---------|----------|
| 1     | 45.582    | 69823   | 199    | 1.996   | 1.847    |
| 2     | 61.079    | 2299988 | 7331   | 65.765  | 68.015   |
| 3     | 71.645    | 38085   | 349    | 1.089   | 3.235    |
| 4     | 87.127    | 1089380 | 2900   | 31.149  | 26.904   |
| Total |           | 3497275 | 10779  | 100.000 | 100.000  |
